# Supplementary material
Source: PubMed Central journal article supplement (PMC2687331)
Supplement: supp_77_6_2576__1.pdf [file supp_77_6_2576__1.pdf]

## Day 7

| Group                      | AST (U/L)                | ALT (U/L)     | GGT (U/L)                 | LDH (U/L)   | ALP (U/L)  |
|----------------------------|--------------------------|---------------|---------------------------|-------------|------------|
| Control                    | 28.0 ± 8.4 <sup>a</sup>  | 38.0 ± 2.8    | 40.0 ± 8.4 <sup>ab</sup>  | 407 ± 188   | 199 ± 11   |
| 100 ug/kg ATRA             | 29.3 ± 11.1 <sup>a</sup> | 52.0 ± 35.5   | 31.0 ± 1.7 <sup>ab</sup>  | 571 ± 187   | 158 ± 19   |
| 1,000 ug/kg ATRA           | 33.3 ± 4.0 <sup>a</sup>  | 31.3 ± 3.8    | 25.7 ± 8.1 <sup>a</sup>   | 466 ± 79    | 165 ± 48   |
| Infected                   | 29.9 ± 5.9 <sup>a</sup>  | 34.0 ± 1.7    | 49.3 ± 31.3 <sup>ab</sup> | 418 ± 96    | 196 ± 55   |
| Infected, 100 ug/kg ATRA   | 54.0 ± 4.0 <sup>b</sup>  | 52.0 ± 21.0   | 25.0 ± 7.6 <sup>a</sup>   | 656 ± 182   | 144 ± 16   |
| Infected, 1,000 ug/kg ATRA | 28.0 ± 8.2 <sup>a</sup>  | 36.7 ± 3.0    | 55.7 ± 6.6 <sup>b</sup>   | 452 ± 31    | 139 ± 11   |
|                            | TBili (mg/dL)            | DBili (mg/dL) | Total Protein (g/dL)      | Glob (g/dL) | ALB (g/dL) |
|                            | 0.20 ± 0.00              | 0.10 ± 0.00   | 5.8 ± 0.4 <sup>a</sup>    | 3.2 ± 0.1   | 2.6 ± 0.3  |
|                            | 0.20 ± 0.10              | 0.20 ± 0.10   | 6.0 ± 0.2 <sup>ab</sup>   | 3.5 ± 0.3   | 2.5 ± 0.2  |
|                            | 0.27 ± 0.12              | 0.20 ± 0.10   | 5.9 ± 0.2 <sup>ab</sup>   | 3.3 ± 0.5   | 2.6 ± 0.3  |
|                            | 0.23 ± 0.01              | 0.20 ± 0.00   | 6.5 ± 0.2 <sup>b</sup>    | 3.7 ± 0.5   | 2.8 ± 0.5  |
|                            | 0.23 ± 0.01              | 0.20 ± 0.00   | 6.0 ± 0.7 <sup>ab</sup>   | 3.5 ± 0.6   | 2.6 ± 0.1  |
|                            | 0.20 ± 0.00              | 0.13 ± 0.06   | 5.9 ± 0.1 <sup>a</sup>    | 3.4 ± 0.3   | 2.5 ± 0.3  |

## Day 14

| Group                      | AST (U/L)     | ALT (U/L)     | GGT (U/L)            | LDH (U/L)   | ALP (U/L)              |
|----------------------------|---------------|---------------|----------------------|-------------|------------------------|
| Control                    | 28.0 ± 6.9    | 34.0 ± 7.4    | 36.0 ± 6.8           | 420 ± 53    | 195 ± 41 <sup>a</sup>  |
| 100 ug/kg ATRA             | 38.3 ± 6.7    | 40.7 ± 5.1    | 38.7 ± 23.7          | 448 ± 61    | 166 ± 55 <sup>ab</sup> |
| 1,000 ug/kg ATRA           | 33.3 ± 14.2   | 37.0 ± 13.2   | 31.3 ± 7.7           | 430 ± 21    | 181 ± 22 <sup>ab</sup> |
| Infected                   | 20.0 ± 7.7    | 29.0 ± 9.9    | 30.0 ± 2.8           | 417 ± 134   | 143 ± 5 <sup>ab</sup>  |
| Infected, 100 ug/kg ATRA   | 30.0 ± 9.0    | 38.7 ± 10.7   | 33.0 ± 5.2           | 521 ± 92    | 159 ± 26 <sup>ab</sup> |
| Infected, 1,000 ug/kg ATRA | 29.0 ± 4.3    | 34.0 ± 1.0    | 28.3 ± 14.4          | 423 ± 32    | 125 ± 15 <sup>a</sup>  |
|                            | TBili (mg/dL) | DBili (mg/dL) | Total Protein (g/dL) | Glob (g/dL) | ALB (g/dL)             |

| ALB (g/dL) | ALB/Glob Ratio |
|------------|----------------|
| 2.7 ± 0.4  | 0.8 ± 0.2      |
| 2.7 ± 0.2  | 0.8 ± 0.1      |
| 2.6 ± 0.5  | 0.9 ± 0.4      |
| 3.0 ± 0.3  | 0.8 ± 0.0      |
| 2.6 ± 0.3  | 0.8 ± 0.3      |
| 2.8 ± 0.2  | 1.0 ± 0.5      |
