# Supplementary material
Source: PubMed Central journal article supplement (PMC2687331)
Supplement: supp_77_6_2576__2.pdf [file supp_77_6_2576__2.pdf]

| Gene     | Forward Primer                 |        |
|----------|--------------------------------|--------|
| ALOX15   | GACGCTGGAGACGGTGATG            | 900 nM |
| ALOX5    | GTGGGCATGTGCAGATGGT            | 900 nM |
| ALOX5AP  | AATGGGCGGAGCTTCCA              | 900 nM |
| ARG1     | TACTGGGCGGAGACCACAGT           | 300 nM |
| BCL6     | GAAAATAATATTGCTTCTTCTCCTATGTGT | 900 nM |
| BDKRB2   | GCGCAGCTGGATGGTGTT             | 100 nM |
| BLR1     | ATCTCTCTGGGCTTCCACAAGA         | 900 nM |
| C19orf10 | CTTGGACAGCTCAGCCTTGAA          | 900 nM |
| CCL11    | TCTCCACAGCCCTTCTGTGTCT         | 900 nM |
| CCL16    | GGGCTACAAAAGGCCTTCA            | 900 nM |
| CCL17    | AGGATGCCCATGCAGCTC             | 900 nM |
| CCL19    | TACTGGCCCTCAGCCTGCTA           | 900 nM |
| CCL2     | GCGGCTGATGAGCTACAGAAG          | 300 nM |
| CCL20    | GCTCCTGGCTGCTTTGATG            | 900 nM |
| CCL21    | GTTGCCCATCCCAGCTAT             | 200 nM |
| CCL22    | CCCTCGTCCTCCTTGCTATG           | 900 nM |
| CCL23    | GCATTTCTGAACTTGCTCGTCAT        | 900 nM |
| CCL24    | GCAGCTGTGGGTCCAGAAGT           | 900 nM |
| CCL25    | TGCTATCCATGCTCAAGGTGC          | 900 nM |
| CCL26    | CCCAGCAGGCTGTGATATTCA          | 900 nM |
| CCL27    | TGGAAGTGCAGGAAGCTGATG          | 900 nM |
| CCL28    | TGAATACATGTGCGCTTCAGAGA        | 900 nM |
| CCL3     | CCTGTCACCTCCACAGCTACCT         | 900 nM |
| CCL4     | TCTGCTCTCCAGCGCTCTC            | 900 nM |
| CCL5     | TGGCAGCAGTCGTCTTTATCA          | 300 nM |
| CCL8     | CCTTCAAGAACTGGAGAGCTACAC       | 900 nM |
| CCR1     | AACCCCGTGCCAGAAGGTA            | 900 nM |
| CCR10    | AGGGATGGAGTATGGGAAGTGTC        | 900 nM |
| CCR2     | CAGGGCTGTATCACATTGGTTATT       | 900 nM |
| CCR3     | ACAATGTTCTGCATCTGACCTAAAAT     | 900 nM |
| CCR4     | TTCACTTCCAGGGCTTTTGTTT         | 900 nM |
| CCR5     | GCACAGCTCAGCTGGTCAGA           | 900 nM |
| CCR6     | CCTGCACTGCTGCCTCAA             | 900 nM |
| CCR7     | CGACACGTACCTGCTCAACTTG         | 900 nM |
| CCR8     | TGCGACTTTTCTGGAATATTTCTG       | 900 nM |
| CD274    | TCAGATCACAGATGTGAAATTGCA       | 900 nM |
| CD276    | CCCTTGACCGGCAACGT              | 900 nM |
| CD28     | AAGGGATGCCCGGAACTC             | 300 nM |
| CD38     | TGTCCAAAAGTTTTGCAGAAAAT        | 900 nM |
| CD4      | ACCTCTCGCCTCGATTCTGA           | 300 nM |
| CD40     | CCACCTGGAATAGAGAGAAACTGT       | 900 nM |
| CD40LG   | GAAATGCACAAAGGCGATCA           | 300 nM |
| CD69     | GGATACCAGACGAAATGCTATTTTATT    | 900 nM |
| CD80     | ATGGAGAAGAATTAATGCTACCAACAC    | 900 nM |
| CD86     | TGGGTCGCACAAGCTTTGA            | 900 nM |
| CD8A     | GAGCAACTCGTTTTGTATTTTCTG       | 300 nM |
| CD8B1    | GGCTGAGTGTGGTTGATGTCTTT        | 300 nM |
| CFTR     | CCCTATGTCAACCCTCAACACA         | 900 nM |

|         |                              |        |
|---------|------------------------------|--------|
| CHI3L1  | TGGAATGATGTGACGCTCTATGA      | 900 nM |
| CHI3L2  | TCTGCAAGGCGCCAAGAT           | 900 nM |
| CHIA    | TGGTTTCCACTGCGGAGAA          | 900 nM |
| CHIT1   | CTGGACCGGTCCAGGTAATAG        | 900 nM |
| CLCA1   | CATTGATACTGTGGTTGAATTCTGTAAA | 900 nM |
| CLEC10A | CTCGGAGGAGCATTTCAGAGTAG      | 900 nM |
| CMA1    | GACCGTCGGATGCAAAGC           | 900 nM |
| CMKOR1  | CCTGGAGGTTTTATATGGTGATTTG    | 900 nM |
| CTLA4   | TGAGTTGACCTTCCTTGATGACTCTA   | 900 nM |
| CX3CL1  | CTCAGTACTTCCATCCCCGACT       | 900 nM |
| CX3CR1  | TGCACTCTTTCTCCTCCCTTA        | 900 nM |
| CXCL10  | TTGAAATGATTCTGCAAGTCAA       | 900 nM |
| CXCL11  | TTCAAGGCTTCCCCATGTTC         | 900 nM |
| CXCL12  | TCCTGCCATGGGTGTCAAG          | 900 nM |
| CXCL14  | TCATCACCACCAAGAGCATGTC       | 900 nM |
| CXCL16  | TCATCCCCACCAGTGAAACC         | 900 nM |
| CXCL2   | AAGGCATAATGCCTTGTTTAGAGTTAA  | 900 nM |
| CXCL5   | CGTTGCATGTGTTAAACCACCA       | 900 nM |
| CXCL9   | ATTTGCCCAAGCCCTTCT           | 900 nM |
| CXCR3   | TCTTCCTATGACTATGGAGAGAATGAGA | 900 nM |
| CXCR4   | CATCTTCTTAAGTGGCATAGTGGGTAA  | 900 nM |
| CXCR6   | CCACAGCATGACCAGCTTCTACTA     | 900 nM |
| CYP26A1 | CTGGCTGCCTCTCCAACCT          | 900 nM |
| CYSLTR1 | CCGCAATCAAGTATATTCCACCTT     | 900 nM |
| CYSLTR2 | TGTCAACATGTACAGCAGCATTTATT   | 900 nM |
| DEF6    | TGGAGAAGAGCGGCAAGGT          | 900 nM |
| EBI3    | CACATCTTTCATTGCCACGTACA      | 900 nM |
| EPX     | TGGCCTCCCAGGGTACAAT          | 900 nM |
| ETS1    | CCCGGCAGTGGACAGAGA           | 900 nM |
| ETS2    | TTGGCAAGGAGCGCTTTC           | 900 nM |
| FCER1A  | ACTATTACTGGCTACAGCTTCATATCCC | 900 nM |
| FCGR3B  | TGGGACCGGTTGCTTGAG           | 900 nM |
| FOXP3   | CCCTGCCCTTCTCATCCA           | 900 nM |
| GATA3   | TCTAGCAAATCCAAAAAGTGCAAA     | 900 nM |
| GCNT1   | CACAAAATTGAAATGCTTGACAGACT   | 900 nM |
| GPR44   | CTCCCTGCCCTTCTTACCTA         | 900 nM |
| HAVCR2  | TCTTCAGAACCCATGTTTTACA       | 900 nM |
| HDC     | GGACAGCATCTTTGGAGACATAGAG    | 900 nM |
| HLX1    | TTGCTCCTTCCCCCTGG            | 900 nM |
| HMBS    | GCACGGCCATGTCTGGTAAC         | 900 nM |
| HNMT    | AAGCATTGGAGACACAAATTCTGA     | 900 nM |
| ICOS    | CACGGGCATGAACCAAGTC          | 300 nM |
| IFNG    | TGGTAGCTCTGGGAAACTGAATG      | 300 nM |
| IGHA1*  | CTTGGAACAAAGGAGAGACATTCTC    | 900 nM |
| IGHE    | ACCACCAGGCCCCACAA            | 900 nM |
| IGHG1*  | GGGAGCCGCAGGTGTACA           | 900 nM |
| IGHG2A* | TCCAAGACTCCGGGTAAATGA        | 900 nM |
| IGHG2B* | TCCAAGACTCCGGGTAAATGA        | 900 nM |
| IGHG3*  | GGTGGACAAGCGTGTTGGA          | 200 nM |

|          |                               |        |
|----------|-------------------------------|--------|
| IGHG4*   | GGGAGCCGCAGGTGTACA            | 300 nM |
| IGHM     | GCACAAAGGGCTGAACTACGA         | 900 nM |
| IGJ      | TGTAAGTGTGCCCGGATTACTTC       | 900 nM |
| IL10     | TGAGAACAGCTGCATCCACTTC        | 300 nM |
| IL12B    | TCTTGGGAGGGTCTGGTTTG          | 300 nM |
| IL13     | CTGACCACCAGCATGCAGTACT        | 50 nM  |
| IL13RA1  | CGAGTCTGCTGTTACTGAGCTACAA     | 300 nM |
| IL13RA2  | ATTTTAAGGAATGCACAGTAGAGTATGAA | 900 nM |
| IL18     | CGTGTTTGAGGATATGCCTGATT       | 300 nM |
| IL18R1   | CAGAGAATGGAGAGGAGTATACCTTTG   | 900 nM |
| IL1A     | CTGAAGAAGAGACGGTTGAGTTTAAA    | 900 nM |
| IL1B     | TTGAATTCGAGTCTGCCCTGT         | 900 nM |
| IL2      | ACAGTTGCTTTTGAAGGAAGTTAAGAA   | 300 nM |
| IL22     | ATACGGCATTGGCTTAGCTTTT        | 900 nM |
| IL23A    | GAGAAGAGGGAGATGATGAGACTACA    | 900 nM |
| IL2RA    | AAGCGAGTTTACCACTTCATGGA       | 50 nM  |
| IL4      | GCCGGCCTCGACTGT               | 300 nM |
| IL4R     | GCAGCGGCATTGTCTATTCA          | 300 nM |
| IL5      | GACTGGTGGCAGAGACCTTGAC        | 300 nM |
| IL5RA    | CAAGGATGCCCTGAGGA             | 900 nM |
| IL6      | AATGTCGAGGCTGTGCAGATT         | 300 nM |
| IL8      | CCGTGTCAACATGACTTCCAA         | 300 nM |
| IL8RA    | GCCCTGCCCATCTTCATCTT          | 900 nM |
| IL8RB    | GCCCTGCCCATCTTCATCTT          | 900 nM |
| IL9      | CCTGTGAACAGCCATGCA            | 900 nM |
| INDO     | CTGGTTTTCGCTATTGGTGGAA        | 300 nM |
| IRF1     | ATCCAGCCCTGATACCTTCTCT        | 900 nM |
| ITGB1    | TGCCGGGTTTCACTTTGC            | 900 nM |
| ITK      | GGTTCGTCTTGATGACCAGTAC        | 900 nM |
| KIT      | CCCTAATGTCTGAACTCAAAGTCTTAAG  | 900 nM |
| KITLG    | AAAAAGATTCCAGAGTCAGTGCACA     | 900 nM |
| KLRB1    | TTTATAAACACTGGAATGACAGTCTAGCT | 900 nM |
| LILRB4   | GGAAGCCCAACTCCCTGGTA          | 900 nM |
| LTC4S    | TGAAGGACGAGGTGGCTCTT          | 900 nM |
| MAF      | CAGTTATAAAAATGGCATTACTGCACA   | 300 nM |
| MRC1     | GGATGGCTCTGGTGTGGAA           | 900 nM |
| MST1     | GGGCACTGTGGCCATCA             | 900 nM |
| MST1R    | CCCCACGAGCGGGTAGT             | 900 nM |
| MUC2     | GTGCAGGTGCAGGTCAACA           | 900 nM |
| MUC3A    | AGTGGTTCGAGATCTGGGATGA        | 900 nM |
| MUC5AC   | TGCTCCTGGTCCAAGTGGTT          | 900 nM |
| NFATC2IP | AAGCACCAGATGCTGGAAGTC         | 900 nM |
| NOS2A    | CGTTATGCCACCAACAATGG          | 300 nM |
| PDCD1LG2 | GGGCAGTATCGCTGCTTCA           | 900 nM |
| PF4      | GCTGCGTGTGTGTAAAGACCAT        | 900 nM |
| PIAS1    | GCTATATTAACACATCCCTCATCCAA    | 900 nM |
| PIAS2    | GAAGATGATCCGAGCTGCAGTT        | 900 nM |
| PIAS3    | GACCTACCCCGACCAAGAA           | 900 nM |
| PIAS4    | ACCTCACCCACCTCATGTACCT        | 900 nM |

|          |                                 |        |
|----------|---------------------------------|--------|
| PIGR     | AAGGGCCAGGGAGACTGAGA            | 900 nM |
| PPBP     | TCAGGGCAGGAGCTCACTGT            | 900 nM |
| PPIA     | GCCATGGAGCGCTTTGG               | 900 nM |
| PRF1     | TTCGCGGCCAGAAAGAC               | 900 nM |
| PTGS2    | CTGAACACCTCCGCTTTGC             | 900 nM |
| RAI17    | AATCCTGCCAACTTCCACAATG          | 900 nM |
| RETNLB   | GCCTTTCTATAGGATGAAGCCAACT       | 900 nM |
| RPL32    | TGGAAGAGACGTTGTGAGCAA           | 300 nM |
| RUNX1    | TGAGTCAGCCTTTCTCCTGTGTAG        | 900 nM |
| SCNN1G   | GCTGCCTACTCCCTGCAGATC           | 900 nM |
| SLC11A1  | GGCCGTGGGCATCGTT                | 900 nM |
| SOCS1    | TTCTTCGCCCTCAGTGTGAA            | 900 nM |
| SOCS2    | GGGTCTAACCGTGGACATTAC           | 900 nM |
| SOCS3    | CCCCTAGAAGAGCCTATTACATCTACTC    | 900 nM |
| SOCS5    | ATGTACCTGGAAAATAAACCTCTTGG      | 900 nM |
| SOCS7    | TCTTATATCCGAAAGTTCTACTACTATGATC | 900 nM |
| STAT1    | CACAGAAATCAATTCAGTCTTGATGTATC   | 300 nM |
| STAT4    | GAAAACCCTCTGAAGTACCTCTATCCT     | 300 nM |
| STAT6    | CCTGGGTTGGTGAAGACATGT           | 300 nM |
| TBX21    | TGGACCAACTGTCAATTGCT            | 300 nM |
| TFEC     | TGCCAACAAATTGACTCTGTCTCA        | 900 nM |
| TGFB1    | AGGGCTACCATGCCAATTTCT           | 300 nM |
| TMED1    | GCGGAAGCAATGTTTCTATCAGT         | 900 nM |
| TNF      | TGGCCCCTTGAGCATCA               | 300 nM |
| TNFRSF18 | GTCCCAGCTGCTCCCAGTTT            | 900 nM |
| TNFRSF4  | TGGACCAACTGCACCTTGGT            | 900 nM |
| TNFSF18  | TTGGAGGCTGAAGATACTTCAGAA        | 900 nM |
| TNFSF4   | AGGACGAAGACTCTTGAGGAACAA        | 900 nM |
| TNFSF8   | TTCCAAGTCACATGATCCAGGAT         | 900 nM |
| TNFSF8   | TTCCAAGTCACATGATCCAGGAT         | 900 nM |
| TPSAB1   | ACCGGCCTGGCATCTACAC             | 300 nM |
| TRA@     | CCTCCAAAACCTGTCAGTGATG          | 900 nM |
| TSLP     | GCATCAGGGAGACTCCAACCT           | 900 nM |
| TXK      | GTAGAGCTGAACGAGCCTTGAGT         | 900 nM |
| UBC      | GCGCACCTGTCTGACTACA             | 900 nM |
| VTCN1    | TTTGATAGAAAAGAATGCTTTGTTTCTAG   | 900 nM |
| XCL1     | CGAAGTCCTACACAAGAGCATCTG        | 900 nM |
| XCR1     | TCTTCTGCAAGCTTCTCAACATG         | 900 nM |

Reverse Primer

|                                     |        |
|-------------------------------------|--------|
| TGCTGACCTAGAGCCACCATAG              | 900 nM |
| GTAGGTGGGAATGTCTTCTTTGCT            | 900 nM |
| CAGAGCACCACGAGGAAGGT                | 900 nM |
| CCACCCAAATGACACAGAGATCT             | 300 nM |
| TTCCTCATTTTGCAGACTAAGTCAAG          | 900 nM |
| GCACGGTGCAGTAGGTGATG                | 300 nM |
| CTTCCTCTGGTTCATCTGAGTAGT            | 900 nM |
| CCTGAAAAGTGAGGAATTTGAAGTG           | 900 nM |
| GGGATCTTCTTTCTGGTCACATTA            | 900 nM |
| CATCAGGGTTGGTGCAGATCT               | 900 nM |
| GGAATGGCCCCTTTGAAGTAC               | 900 nM |
| GAAAGGCTCGAACCAGATTCC               | 900 nM |
| CCGCGATGGTCTTGAAGATC                | 900 nM |
| GGGTGAAGAATATGGTCTGTATATCG          | 900 nM |
| CAGATGGCGCATCAGTTCCT                | 200 nM |
| GCAGACACTGTCTCCACGTT                | 900 nM |
| TGAAAGATTATACTAACGACCAGTGA          | 900 nM |
| TGATCCTAGCGGAGGCTTTC                | 900 nM |
| GCAGGCGCCACTTAATGTG                 | 900 nM |
| CCCATGTTTCCTGCGGTTT                 | 900 nM |
| GCAGACACTGCGTCGAGACA                | 900 nM |
| TGAGGGCTGACACAGATTCTTCT             | 900 nM |
| CATTGAAAATAAATAACCTCAATTAATACTATAAA | 900 nM |
| CACGAAGTTGCGAGGAAGCT                | 900 nM |
| CCCGCACCCATTTCTTCTC                 | 900 nM |
| CGGCTTTGGTCTTGAAGATCA               | 900 nM |
| GCCGATCAGGCCAATGAC                  | 900 nM |
| CGCGATGGCCACGTATC                   | 900 nM |
| GAACACAGCGTGGACGATAGC               | 900 nM |
| AGAATGGAAAGAACCAGCTCTGTCT           | 900 nM |
| CCTTCCATCTTGTGGAGTTGAAA             | 900 nM |
| CGTCGTTTGATAATCCATTTTGC             | 900 nM |
| TTCAGAAAGTAGCTCCGGA                 | 900 nM |
| ACTTGGCCGCGCTGTATG                  | 900 nM |
| TGCTGTGTGAACCCTATAATCTATGC          | 900 nM |
| TTTTGCGATATGGAGCATTGAC              | 900 nM |
| ACGCTGCGCACATCGAA                   | 900 nM |
| GCCATACTTGTGGTGAACGA                | 300 nM |
| TGGTTTTATCAAAGGCGTTACTGA            | 900 nM |
| CCCGGAGTCGGTACTTCAAG                | 300 nM |
| CACACAAGTGGTGTCTGTTTTCG             | 900 nM |
| TGCTGTTTTACTACTGGCCTCG              | 300 nM |
| TGGTGTGGAGCAGAAGCTTT                | 900 nM |
| GCCTGTCACATTGAAATCCAGTT             | 300 nM |
| TGAGCCCTTGTCTTGATTTG                | 50 nM  |
| GCTTGGGTGGTGGCGTAGT                 | 300 nM |
| TGGTAATCGGCATATTTTCTTCTTG           | 300 nM |
| TAAGAGGCAGGAGATCATCCAAAA            | 900 nM |

|                                   |        |
|-----------------------------------|--------|
| AAAGTTCCATCCTCCAACAGACA           | 900 nM |
| ACCCACTGGTTCCTTGAC                | 900 nM |
| CCCATACTGGCGCAGAAATT              | 900 nM |
| CATTTGCAAGAGGAGCTGAACAC           | 900 nM |
| GTTTTCTTAAAGTCTTCAGAATCTTGGA      | 900 nM |
| AGCCACACACAGGGCACTGT              | 900 nM |
| AGTCCAGGGCCCGTCATG                | 900 nM |
| GCCTTATACCTCCCATAACAATATTTAAAATA  | 900 nM |
| TTGGATGGTGAGGTTCACTTTG            | 900 nM |
| TGCAGACTCTGGTAGGCAAACA            | 900 nM |
| GTAATGAGTAAAATTGCTGCTCAGAATAC     | 900 nM |
| GACATCTTTTCTCCCCATTCTTTT          | 900 nM |
| CTTTCTCAATATCTGCCACTTTCACT        | 900 nM |
| AACGTGGCTCTCAAAGAATCG             | 900 nM |
| CTCATTCCAGGCGTTGTACCA             | 900 nM |
| TCCCTGGCCTCAGACTTAGC              | 900 nM |
| TTATTTGTAAAATTACATCAATAAATATCCAAA | 900 nM |
| TCACTTCTGCCTTGGAGCACT             | 900 nM |
| GCTGACCTGTTTCTCCCACTCT            | 900 nM |
| AGCACGAAGAGGAGGCTGTAGA            | 900 nM |
| CCGTCATGCTTCTCAGTTTCTTC           | 900 nM |
| GTCTTTCACAAGTTTCCAGAAGTTCTT       | 900 nM |
| GCTGAAGGCCTGCATAATCAC             | 900 nM |
| GGTATGCTGACTTCTCATGATATGTTTT      | 900 nM |
| CCGGAAGGGGTGAACAGTT               | 900 nM |
| ATGAGGGATGTGCAGGACTGT             | 900 nM |
| ACCATGGAGAACATCAGGACATC           | 900 nM |
| CAGGAACTTCCTCGCCAAAG              | 900 nM |
| CTTTCAGGCTGAACTCATTGACA           | 900 nM |
| TGTCTTTTCTTGGTTTTCTTTGATCA        | 900 nM |
| CTGGGTTGAGATCAGTAGCCCT            | 300 nM |
| TTGAGATGAGGGTCCCATTCC             | 900 nM |
| GTGGCCCGGATGTGAAAA                | 900 nM |
| GGGTTGAACGAGCTGCTCTT              | 300 nM |
| CTGATTTTTTGTCCACGTGAATG           | 900 nM |
| GAAGAAGATGGAGGAGTGCAGCT           | 900 nM |
| ACGTAGGCCCTTCCAGAGAT              | 900 nM |
| GGGTAGTAGGCGTGCATATGG             | 900 nM |
| AGGATGTCCGCGATGCA                 | 900 nM |
| CCACCACACTGTCCGTTTGTAT            | 300 nM |
| CCTGGGTATTGAGCCCGTACT             | 900 nM |
| GGAGTCAAATCAAGTCCAGGAAATA         | 900 nM |
| GGCTTTGCGCTGGATCTG                | 300 nM |
| ACGTGTTCACTTTGGGTTTGG             | 300 nM |
| GATCACCTCGCAGGCAAATT              | 900 nM |
| TGCTCTTCCACTCAACATGGAT            | 900 nM |
| CCCGGGCGATATGTACACA               | 900 nM |
| GCCCGGGACGTATGTACACA              | 900 nM |
| GCCCGGCCACTTCACA                  | 200 nM |

|                                 |        |
|---------------------------------|--------|
| CTCCGGCTGTCCGTTTCTT             | 900 nM |
| GATGGCGAAGACGGTGATG             | 900 nM |
| TCTGATGTTTCTCTCCACAATGTCTT      | 900 nM |
| TCTGGTCCTTCGTTTTGAAAGAAA        | 300 nM |
| AAGCTGTTCACAAGCTCAAGTATGA       | 300 nM |
| GCTGCAGTCGGAGATGTTGA            | 900 nM |
| TCCAGGGAGCCAGGTACAC             | 900 nM |
| CCCATCTTTGTAATGTAGATTCTTAGTAATG | 900 nM |
| TGGTTACTGCCAGACCTCTAGTGA        | 300 nM |
| GGATCTCCTCAACAACAGCTCTTC        | 900 nM |
| AAGTTGTATTTTCATGTTGCTCTGGAA     | 900 nM |
| CCCAGGAAGACGGGCTTT              | 900 nM |
| CCTGCTTGGGCATGTAAAATTT          | 300 nM |
| GAGCGCTGCTACCTGGTGA             | 900 nM |
| GGTGGATCCTTTGCAAGCA             | 300 nM |
| GGCAGACCCATCCCTGAAC             | 300 nM |
| TCCGCTCAGGAGGCTCTTC             | 300 nM |
| TCTTCACAACAGCAGCTACAGCA         | 900 nM |
| CTTCAATGCATAGTTGGTGATTTGT       | 300 nM |
| TGCTGTATTCTTGGCATTCTTCA         | 900 nM |
| TGGTGGCTTTGTCTGGATTCT           | 900 nM |
| GCCTCACAGAGAGCTGCAGAA           | 900 nM |
| GTATTGGCGCCAGATCCT              | 900 nM |
| TTGTATTGGCGCCCATGTC             | 900 nM |
| GGAAACTTTCCAGGAGACTCCTC         | 900 nM |
| GCATCCAGGTCTTCACACTGTATT        | 300 nM |
| GGCCTGTTCAATGTCCAAGTC           | 900 nM |
| GTGACAATGTCCATCATTGGTAAA        | 900 nM |
| CTATAGCGATTGAAAGAGAAGACTTCTG    | 900 nM |
| ATCACCATAGCAACAATATTCTGTAAT     | 900 nM |
| CTGCTACTGCTGTCATTCCCTAAGG       | 900 nM |
| TGTATGAGTCTCAATTCCTCATTATCTTG   | 900 nM |
| GCATCACTGGGCTCTGACCT            | 900 nM |
| CCTGCGCGCCGAAAT                 | 900 nM |
| AACATTTACTGATTATTGCCTTGAAAAC    | 900 nM |
| AATGCTGGTCAGTGGATCTTTATTC       | 900 nM |
| CGGCAGAAGTTCTCCTCAA             | 900 nM |
| GATTCGATTCTGGCCTCATC            | 900 nM |
| AGAGGCCGTTGTAGGAGATGAG          | 900 nM |
| CCAAGGCCACATGGAGTT              | 900 nM |
| GGAGGATATTGCTGTAGGTCTCAAA       | 900 nM |
| TCCCATGGCCTCCTCGTA              | 900 nM |
| AGACCCGGAAGTCGTGCTT             | 300 nM |
| TCTTTATTTTCTTGTAGGAAGCTTTGACT   | 900 nM |
| GGTCCGGCCCCAATCA                | 900 nM |
| GGAAAGAAATCTAATCCTTGTAAGTCATAA  | 900 nM |
| TCATTAACAGACTACTCAGTACCATTCCA   | 900 nM |
| GGCTCCGTAGCACCGAAGA             | 900 nM |
| AAGTACAAGGCCACAGAGTAACTCTTG     | 900 nM |

|                              |        |
|------------------------------|--------|
| TTCACCATCCTTCACTGCTCTGT      | 900 nM |
| TTCTGGATCCAGGCAGATTTTC       | 900 nM |
| TTATTAGATTTGTCCACAGTCAGCAAT  | 900 nM |
| CTGTAGAAGCGACACTCCACTGA      | 900 nM |
| AAGCACATCGCACACTCTATTATGT    | 900 nM |
| TCCAGGTCTGAACCCTTGCT         | 900 nM |
| ACAAGGGAGTCTAAGGAACACTGAGA   | 900 nM |
| CGGAAGTTTCTGGTACACAATGTAA    | 300 nM |
| TGTAICTGGACAGCAAGCAGAT       | 900 nM |
| GCGGAGGCAGAGGCTTACT          | 900 nM |
| GTACATGTTGGCTTCTCGGATGT      | 900 nM |
| GGCCTGGAAGTGCACGC            | 900 nM |
| CCCCCATATCTGGAAGAAAA         | 300 nM |
| AGGTGGCCGTTGACTGTTTT         | 900 nM |
| TGGAGTTTCAAGTTACCTCTTTAAAACA | 900 nM |
| CCTCTTGCTTCTGTTTGGAAATG      | 900 nM |
| GAAAGTACTACTCCAGGCCAAAGGA    | 300 nM |
| TCACATGGCTGGGAGCTGTA         | 300 nM |
| GCCCCTCCAAGAGAAGCTTAG        | 300 nM |
| ACGGCTGGGAACGGGATA           | 300 nM |
| TGAAGTGTGACAAAGGATCAGAGAA    | 900 nM |
| CGGGTTGTGCTGGTTGTACA         | 300 nM |
| TGCGATCACCTGGTACTCAGTCT      | 900 nM |
| CGGGCTTATCTGAGGTTTGAGA       | 300 nM |
| GGCTGCACACGGCATTG            | 900 nM |
| TGTCCTCACAGACGGCATCT         | 900 nM |
| TTGCCCTTGTAAGCTGTGTT         | 900 nM |
| GATGTAGGTGAGACACAGGAGCAA     | 900 nM |
| TCACACCTTATCTCTCCTCATCTGA    | 900 nM |
| TCACACCTTATCTCTCCTCATCTGA    | 900 nM |
| AGGAGGTGACTGGCTTTGCA         | 300 nM |
| GGACCACAGCCGCAGTGT           | 900 nM |
| CTTCTCATTCCCAGTGCACATG       | 900 nM |
| CCATCAACGAAGGTTCCATGT        | 900 nM |
| AGATCTGCATCCCACCTCTGA        | 900 nM |
| TATAACAAAATGTAATACAGCCATGGTG | 900 nM |
| GCCCTCCTTGATGGTGTAGGT        | 900 nM |
| GGCTGACCACGGACAGGTA          | 900 nM |



| Probe                               |        |
|-------------------------------------|--------|
| TCCATCACTTGGCAGCTGGGCA              | 200 nM |
| AGGACCTGACCTATGCCTCCCTGTGCTT        | 200 nM |
| CCTTTGAGCGGGTCTACACTGCCAAC          | 200 nM |
| TGGCCATGCCAGGGTCCACC                | 150 nM |
| CGAACCATGTCAGCAAAGAGCAAATCA         | 200 nM |
| CGTGGGCTTCCTGCTGCCCT                | 200 nM |
| TCTCAGGCAGGGCCCCGGCTTC              | 200 nM |
| AAAACAGCAGTGTCCCACAGGCCTG           | 150 nM |
| ACCCAGGTGCTTGCTTAGCCAGCTTC          | 200 nM |
| TCATCTTCATACCAAACGGAACCGA           | 200 nM |
| AGGCAGCACTCCCGGCCA                  | 200 nM |
| CACAGACAGGCAGCAGTCTTCAGCATC         | 200 nM |
| TCACCAGCAGCAAGTGTCTAAAGAAGCA        | 200 nM |
| AGTCAGAAGCAGCAAGCAACTTTGACTGC       | 200 nM |
| CTCGCCCCGGAAGCGCTCTC                | 900 nM |
| CTTCAAGCAACTGAGGCAGGCCCTA           | 200 nM |
| TGTCATCTTCCTACCAAGAAGGGGC           | 200 nM |
| CCGCTTGGCGTCCAATTTCTTCATG           | 200 nM |
| TGAGGACTGCTGCCTGGCCTACCAC           | 200 nM |
| CACCAAAAAGGCCACAAAGTCTGTGCA         | 200 nM |
| CACCTCCAGGCCTTCGTGCTTCA             | 200 nM |
| ACTTGGCTGCTGTATCCTTCATGTCAA         | 200 nM |
| TTGCCAAACAGCCACTCTCTGGGACTC         | 200 nM |
| CCAATGGGCTCAGACCCTCCCAC             | 200 nM |
| TGGCACACACCTGGCGTTCTTTC             | 200 nM |
| TCACCAACAGCCAGTGTCCCCAGG            | 200 nM |
| TGGGCCCCAAAGGCCCTCTC                | 200 nM |
| CGCGATGGCCACGTATC                   | 200 nM |
| CGGAATCTTCTTCATCATCCTCCTGACAATC     | 200 nM |
| CAGCAGAGAGTTCTGCTCTCCCGTT           | 200 nM |
| CTGAGCGCAACCATACTACTGCAAAACC        | 200 nM |
| CCCTTCAAGAATCTCTCCCGGTCTG           | 200 nM |
| CCGGTGCTCTACGCCTTCATCGG             | 200 nM |
| CATCCTCTTCCTCCTGACCCTTCCCTTC        | 200 nM |
| AGGTGTTTCTTGAAGTCTCGCCCATGA         | 200 nM |
| CGCTTGTAGTCGGCACCACCATAGCT          | 200 nM |
| CCCTGCTCGTTGGCCATCTGC               | 200 nM |
| CAACCTTAGCTGCAAGTACACCTACAATCTTTCTC | 150 nM |
| CATTGAGAAACACCTGCACCATCCC           | 200 nM |
| CCATGGATCCTTCCCTGATCATCAA           | 200 nM |
| CAGCACAAATACTGCGACCCCAACC           | 150 nM |
| ATCCTCAAATTGCGGCACATGTCATAAG        | 200 nM |
| CCAAGAAAACAAAGAAGTGGACCTTGCC        | 150 nM |
| TCCAAGATCCTGAACTGAGCTCTACATGA       | 200 nM |
| CCACCTGGACCCTGAGACTCCACAAC          | 200 nM |
| CAGCAAAGCCCACCAAGACGCC              | 250 nM |
| CCACCACTGCCAGCCCACC                 | 250 nM |
| TGGAGAATCTATTAAGAATCCCACCTGCTTTCA   | 200 nM |

|                                        |        |
|----------------------------------------|--------|
| AACACACTCAAGAACAGGAACCCCAACCT          | 200 nM |
| CTCCAGGATCAGCAGGTTCCCTACGC             | 200 nM |
| CGCCAGACTTTTCATCACCTCAGTCATCA          | 150 nM |
| GGCTGTTCCAGCAAAGCTGCCC                 | 200 nM |
| CACTTCCCATGTGCTTCGGAGATTGC             | 200 nM |
| CACTGCCCATCTGTGTGTGCCAG                | 200 nM |
| CCCTGCTGTCTTCACCCGGATCTC               | 200 nM |
| CACTCTTGGCATACTTCCAGATGTATGTGAA        | 200 nM |
| TGCACTGGCACCTCCACCGAAA                 | 200 nM |
| CAAGGAAGGCCAGCAGCCCCA                  | 200 nM |
| CCCGCCTGCTCCTTTGTGATTGAG               | 200 nM |
| CTTGCCACATGTTGAGATCATTGCCAC            | 200 nM |
| CCAATGCAAAGACACCTTCCCGCTT              | 200 nM |
| CCTCGTGCTGACCGCGCTCTG                  | 200 nM |
| CCCAAGCTGCAGAGCACCAAGC                 | 200 nM |
| ACACATCCACTGTGGGCCACAGTCTG             | 200 nM |
| CCTCTCTATTTTCAGGACAGAGCGGAAACAC        | 200 nM |
| CCCGGATTCATCCCAAGATGATCA               | 200 nM |
| ATCCCCATTCTTCATTGTAGCAATGACTTCC        | 200 nM |
| CTTCGACCGGGCCTTCTCGCC                  | 200 nM |
| CTGGTAACCCATGACCAGGATGACCAATC          | 200 nM |
| CCTGCCTTAACCCTGTGCTCTATGCCTT           | 200 nM |
| ACTCCTCGCACAAGCAGCGCAAGA               | 150 nM |
| CACAAAGCCATTGCCGAAGAAACCC              | 200 nM |
| CCAGGAAACGCACAACACTCAGCAC              | 150 nM |
| CAGCTCAAGGTGCTGTCCCACAACC              | 200 nM |
| CCAGAGGCCACCAGCTGCACC                  | 200 nM |
| AGAGCCACAGAAGCGCCTCCAA                 | 200 nM |
| CCCACATCACCCAGTCCCGAACAT               | 250 nM |
| CCCAGAGAATGTCACCCACAAAGTCAGG           | 200 nM |
| TCCACAACAAACAGAATCGCCACCA              | 150 nM |
| CCCTGGCACTTCAGAGTCACAGAATCCT           | 200 nM |
| AGCCAGAGGACTTCTCAAGCACTGCC             | 200 nM |
| TCCTCCAGCGTGTCGTGCACCT                 | 150 nM |
| CTGAGGGCCATCTATATGCCTCAGAATTTCTATT     | 200 nM |
| CACGAGTGGCCACGGCCA                     | 200 nM |
| TCCTGCCCTTGCTGCTACTCCTCACA             | 200 nM |
| CAATGTACCACCCAGGCATGATGATTC            | 100 nM |
| CGCTGCCGTCAAGAAACCCTCCT                | 200 nM |
| CATCTTTGGGCTGTTTTCTTCCGCC              | 200 nM |
| TGCAGGTGAAATTGATCTTCAAATTCTCTCCA       | 200 nM |
| TCTCTCCAACCTCGAAGTGCAAGATTCCC          | 200 nM |
| CTTCGAAAAGCTGATTAATAATTCCGGTAGATAATCTC | 200 nM |
| AGCGCGCTAACCGCCACCATC                  | 150 nM |
| CCTCCTTCTTCGTCTACAGCCGCCT              | 150 nM |
| CTGTCCAGGAGCAAAGTCACGCTAACCT           | 200 nM |
| CCACTCGCTGCACCCCTCAAGC                 | 200 nM |
| TGCTCTTGGGTCCAAGAGCTCACCT              | 200 nM |
| CAAAGACCAAACCACCATGTCCCATATGC          | 900 nM |

|                                      |        |
|--------------------------------------|--------|
| CTGTCCAGGAGCAAAGTCACGCTAACCT         | 200 nM |
| CTCTCTGTGCACCTCCAATCCCAACTCT         | 100 nM |
| AGGATCATCCGCTCTGCTGAAGACCC           | 200 nM |
| CAACCAGCCTGCCCCACATGC                | 150 nM |
| ACCAGCAGCTTCTTCATCAGGGACATCA         | 200 nM |
| TGCCGCCCTGGAATCCCTCA                 | 150 nM |
| CGTTTGGCACAACCTGCGCTACATG            | 200 nM |
| CGAAACATTGATAGTGAAAGCTGGAAGACGA      | 200 nM |
| TGACTGTTCAGATAATGCACCTCAGACCGT       | 100 nM |
| CAAATGTTTCTCCAACACCCTGGGCA           | 200 nM |
| CAGAAGAAGAAATCATCAAGCCCAGATCAGC      | 200 nM |
| CAACTGGTACATCAGCACCTCTCAAGCAGAA      | 150 nM |
| CGAGAATGCTGATCTCTCCAGGATGCTC         | 150 nM |
| TGAACTTCACCCTTGAAGAAGTGCTGTTCC       | 200 nM |
| CTGAGGATCACAGCCATCCCCGC              | 100 nM |
| CAGACAGTTCGGTACCAGTGCCTCCC           | 100 nM |
| CTTCGGCACATCTACAGACACCACACG          | 200 nM |
| CTGCCACCTGTGCGGCCACC                 | 200 nM |
| CTGCTCTCCATTTCATCGAACTCTGCTGAT       | 200 nM |
| ACGCAGTATTTCTCTACTATAGGTACGGCTCTGTG  | 200 nM |
| AGCACTGATCCAGACCCTGAGGCAA            | 200 nM |
| CTGTTGCCTTCTTGGCAGTTTTCTGC           | 200 nM |
| CGTGAAGCCTACCATCCACCCTACTCC          | 200 nM |
| CGCAGGGCCATCCATCCACC                 | 200 nM |
| ACCACAGTAGGCAACACGCTCATCTTTCTG       | 200 nM |
| CTGCAATCAAGGTGATCCCCACTCTATTCA       | 150 nM |
| TGCCTGATGACCACAGCAGCTACACA           | 150 nM |
| AACAATGCCACCAAGTTTCCCATCTCC          | 200 nM |
| CCAGTTCCACAGGCACCAAATTCCC            | 200 nM |
| CCTGCACCATTGGAGGGCCCA                | 200 nM |
| CCATTTATGTTACCCCTGTTGCAGCC           | 200 nM |
| CTGTTCCACAAAAGAATCCAGTCTGCTGC        | 200 nM |
| TCTCCATAACAATACATGACTGAGGCCTACGC     | 200 nM |
| AGTCCTGCTGCAAGCCTACTTCTCCCTG         | 200 nM |
| AGTTACAGAAAATCCAGTTTCTGCACCACAATACAA | 150 nM |
| TGCCCTCAAATTTCAATGGACAATATCCAAAT     | 200 nM |
| ACCACAAGTACACGCCACACTCCG             | 200 nM |
| TGACCGAGTCATTGGCAAAGGCCA             | 200 nM |
| CATCAACTACGTGGTGGACATCCCCG           | 200 nM |
| CCATCTTTAACTGTTCTGTCTCCTCAAAAACC     | 200 nM |
| CGTGGACTTCCCGTCCCCCG                 | 200 nM |
| CTCCTCTCAAGACCCTCATGTCCCGC           | 200 nM |
| ATCAGGTTCGGCCATCACCGTG               | 200 nM |
| CGCCTGGGACTACAAGTACCTGACTCTGAA       | 200 nM |
| TCAGCCCCAAGCATATCTCCAGCCTA           | 200 nM |
| CATCCTTTCCACATGACACCCATGCC           | 900 nM |
| CTCCTGGCAAATCTGATGACATGCTTGATA       | 200 nM |
| CTACCTGGAAGCAAAGGAGTCCTGACATC        | 200 nM |
| CTCGGCCACCAACCGCATCACT               | 200 nM |

|                                      |        |
|--------------------------------------|--------|
| TCCTGGATCCCAGCCTCATTGCA              | 150 nM |
| TCATTCTTCAGCGTGGCTATCACTTCGAC        | 200 nM |
| TGATCTTCTTGCTGGTCTTGCCATTCT          | 200 nM |
| CACCAGGACCAGTACCGCTTCAGCC            | 200 nM |
| CAGACCAGGCACCAGACCAAAGACCTC          | 200 nM |
| CACCGTCAAACAGCCCATCAGGC              | 200 nM |
| CCTCATCCTCCTTCTTCAGTTGATAATCGCA      | 200 nM |
| ATTTGTTGCACATTAGCAGCACTTCAAGCTC      | 200 nM |
| CCAGCAGAACAGAGACATTGCCAACC           | 200 nM |
| CGCACCCACATTTCTCCACCATCTT            | 200 nM |
| CGCCATCATCATGCCCAACAAC               | 150 nM |
| TTCGGGCCCCACAAGCATCC                 | 150 nM |
| TCTCCCTTCTACCATGTAGAACCCTTTGGC       | 150 nM |
| CTGGTGTTGAGCCGGCCCTC                 | 150 nM |
| TGCTTGATATATAGTCTTTCTCCAAAAATCAGTACC | 200 nM |
| AGCTGCGCTTCCTTTAGAGACAGGTATACCT      | 200 nM |
| CCTTTAGGGCCGTCAAGTTCCATAGGTTT        | 100 nM |
| ACATTCCTCAAAGACAAAGCCTTCGGTAAACA     | 200 nM |
| TGCTGCCTCCCACTGAACAGGACCT            | 200 nM |
| ACCACTACTCTCCTCTCCTCCCCAACCAGT       | 150 nM |
| CAAGCCCTGAGCTCTGTGATCAAGCTATG        | 200 nM |
| CCTAGACACTCAGTACAGCAAGGTCCTGGC       | 200 nM |
| CGCCGGCCAACGCAAGCCT                  | 200 nM |
| CCCTCTGGCCCAAGGACTCAGATCA            | 150 nM |
| CACGTTCCCTGGGAACAAGACGC              | 200 nM |
| CGCCTGCAGCGTTCGCTTCC                 | 150 nM |
| CTTGATTTAATTTATGGCCAAGTGGCTCCCA      | 900 nM |
| CCCAGACCCTGAATTACGGAGGCC             | 150 nM |
| CCCATCTCTGTTCCAAGAAGGATTCTCCC        | 200 nM |
| CCCATCTCTGTTCCAAGAAGGATTCTCCC        | 200 nM |
| CGCGTCACCCACTACTTGGACTGGAT           | 200 nM |
| CATCATCCTCCTGAAAATGGTTGGGTTTAAAC     | 200 nM |
| AGCCCATATTCACCCATGTTGTTGCCT          | 200 nM |
| CATCACTTTAGCCTCTTCAATGAAATCCTCTTCA   | 200 nM |
| AGTCCACCCTGCACCTGGTCCTCC             | 200 nM |
| CCACTGCCTCCCTGGCACTTTGG              | 200 nM |
| TCTAACTACCCGGCGACTGCCAGTAAA          | 200 nM |
| TCTTCTCCATCAGCCTCTACAGCAGCATC        | 200 nM |
