# Supplementary material
Source: PubMed Central journal article supplement (PMC2687331)
Supplement: supp_77_6_2576__3.pdf [file supp_77_6_2576__3.pdf]

Table S3 Liver 7 DA vs Control

|                            | Gene         | 1000 locuses |          | 3000 locuses |          | Control |          | 1000 locuses |          | 3000 locuses |          |
|----------------------------|--------------|--------------|----------|--------------|----------|---------|----------|--------------|----------|--------------|----------|
|                            |              | FC           | p-value  | FC           | p-value  | FC      | p-value  | FC           | p-value  | FC           | p-value  |
| Alternatively Activated M2 | ADAM1        | 0.4          | p < 0.01 | 2.0          |          | 2.2     |          | 2.1          |          | 2.3          |          |
|                            | CD88         | -0.2         | p < 0.01 | -1.5         |          | -0.2    |          | -1.6         | p < 0.01 | -0.5         | p < 0.01 |
|                            | CD74 (M2C)   | 1.8          |          | 1.2          |          | 1.2     |          | 1.8          |          | 1.3          |          |
|                            | IL6          | 1.2          | p < 0.01 | 2.2          |          | 2.1     |          | 1.8          |          | 2.0          |          |
|                            | IL13 (M2C)   | 1.0          |          | 1.8          |          | 1.8     |          | 2.4          |          | 1.1          |          |
|                            | IL6          | 1.8          |          | 2.1          |          | 2.0     |          | 2.1          |          | 2.1          |          |
| Chemokines                 | KCCL1 (M2C)  | 1.8          |          | 1.8          |          | 1.8     |          | 1.8          |          | 1.8          |          |
|                            | KCCL2 (M2C)  | 1.8          |          | 1.8          |          | 1.8     |          | 1.8          |          | 1.8          |          |
|                            | KCCL3 (M2C)  | 1.2          |          | 1.2          |          | 1.2     |          | 1.2          |          | 1.2          |          |
|                            | KCCL4 (M2C)  | -0.2         |          | -0.2         | p < 0.01 | -0.2    |          | -0.2         | p < 0.01 | -0.2         | p < 0.01 |
|                            | KCCL5 (M2C)  | 2.0          |          | 1.8          |          | 1.8     |          | 2.0          | p < 0.01 | 1.3          |          |
|                            | KCCL6 (M2C)  | 0.8          |          | 1.2          |          | 0.8     |          | 0.8          | p < 0.01 | 0.8          | p < 0.01 |
|                            | KCCL7 (M2C)  | 1.8          |          | 1.2          |          | 1.2     |          | 1.4          |          | 1.8          |          |
|                            | KCCL8 (M2C)  | 2.2          |          | 1.8          |          | 1.1     |          | 2.1          | p < 0.01 | 1.2          |          |
|                            | KCCL9 (M2C)  | 1.7          |          | 1.8          |          | 1.4     |          | 1.7          |          | 1.7          |          |
|                            | KCCL10 (M2C) | 2.1          |          | 2.0          |          | 1.7     |          | 2.0          |          | 1.7          |          |
|                            | KCCL11 (M2C) | 1.2          |          | 1.2          |          | 1.2     |          | 1.2          | p < 0.01 | 1.2          |          |
|                            | KCCL12 (M2C) | 1.2          |          | 1.2          |          | 1.2     |          | 1.2          | p < 0.01 | 1.2          |          |
|                            | KCCL13 (M2C) | 1.2          |          | 1.2          |          | 1.2     |          | 1.2          | p < 0.01 | 1.2          |          |
|                            | KCCL14 (M2C) | 1.1          |          | 1.1          |          | 1.0     |          | 1.2          |          | 1.1          |          |
|                            | KCCL15 (M2C) | 1.1          |          | 1.1          |          | 1.1     |          | 1.1          |          | 1.1          |          |
|                            | KCCL16 (M2C) | 1.1          |          | 1.1          |          | 1.2     |          | 1.2          | p < 0.01 | 1.1          | p < 0.01 |
|                            | KCCL17 (M2C) | 1.8          | p < 0.01 | 1.1          |          | 1.8     |          | 1.8          | p < 0.01 | 1.7          | p < 0.01 |
|                            | KCCL18 (M2C) | 1.8          |          | 1.8          |          | 1.8     | p < 0.01 | 1.7          | p < 0.01 | 1.4          |          |
|                            | CCL          | CCL1         | 1.2      |              | 1.2      |         | 1.1      |              | 1.2      |              | 1.2      |
| CCL2 (M2C)                 |              | 1.2          |          | 1.2          |          | 1.1     |          | 1.2          |          | 1.2          |          |
| CCL3                       |              | 1.2          |          | 1.2          |          | 1.2     | p < 0.01 | 1.2          | p < 0.01 | 1.2          |          |
| CCL4 (M2C)                 |              | 1.2          |          | 1.2          |          | 1.2     |          | 1.2          |          | 1.2          |          |
| CCL5 (M2C)                 |              | 1.2          |          | 1.2          |          | 1.2     |          | 1.2          | p < 0.01 | 1.2          |          |
| CCL6 (M2C)                 |              | 1.2          |          | 1.2          |          | 1.2     |          | 1.2          |          | 1.2          |          |
| CCL7 (M2C)                 |              | 1.2          |          | 1.2          |          | 1.2     |          | 1.2          |          | 1.2          |          |
| CCL8 (M2C)                 |              | 1.2          |          | 1.2          |          | 1.2     |          | 1.2          |          | 1.2          |          |
| CCL9 (M2C)                 |              | 1.2          |          | 1.2          |          | 1.2     |          | 1.2          |          | 1.2          |          |
| CCL10 (M2C)                |              | 1.2          |          | 1.2          |          | 1.2     |          | 1.2          |          | 1.2          |          |
| XCL                        | XCL1         | 1.2          |          | 1.2          |          | 1.2     |          | 1.2          |          | 1.2          |          |
| Chemokine Receptors        | CCR1         | 2.0          | p < 0.01 | 1.1          | p < 0.01 | 2.0     | p < 0.01 | 1.8          | p < 0.01 | 1.8          | p < 0.01 |
|                            | CCR2         | 1.2          |          | 1.2          |          | 1.2     |          | 1.2          |          | 1.2          |          |
|                            | CCR3         | 1.2          |          | 1.2          |          | 1.2     |          | 1.2          |          | 1.2          |          |
|                            | CCR4         | 1.2          |          | 1.2          |          | 1.2     |          | 1.2          |          | 1.2          |          |
|                            | CCR5         | 2.8          | p < 0.01 | 1.8          |          | 2.5     | p < 0.01 | 2.9          | p < 0.01 | 2.1          |          |

Table S3 LMER 7 (M) vs Control

|                                  | 1000 locules |                     | 10000 locules |                     | Control |                     | 100 locules |                     | 10000 locules |                     |
|----------------------------------|--------------|---------------------|---------------|---------------------|---------|---------------------|-------------|---------------------|---------------|---------------------|
|                                  | Mean         | SE                  | Mean          | SE                  | Mean    | SE                  | Mean        | SE                  | Mean          | SE                  |
| <b>Chemokine Receptors</b>       |              |                     |               |                     |         |                     |             |                     |               |                     |
| CXCR2                            | 3.2          |                     | 3.2           |                     | 3.2     |                     | 3.2         |                     | 3.2           |                     |
| CXCR3                            | 3.2          |                     | 3.1           |                     | 3.2     |                     | 3.2         |                     | 3.2           |                     |
| CXCR4                            | 3.1          |                     | 3.1           |                     | 3.2     |                     | 3.3         |                     | 3.3           |                     |
| <b>CCR</b>                       |              |                     |               |                     |         |                     |             |                     |               |                     |
| CCR1 (CCR1)                      | 2.5          | <i>p &lt; 0.001</i> | 1.7           | <i>p &lt; 0.001</i> | 1.7     | <i>p &lt; 0.001</i> | 1.6         | <i>p &lt; 0.001</i> | 1.6           | <i>p &lt; 0.001</i> |
| CCR2 (CCR2)                      | 1.8          | <i>p &lt; 0.001</i> | 1.1           | <i>p &lt; 0.001</i> | 1.1     | <i>p &lt; 0.001</i> | 1.1         | <i>p &lt; 0.001</i> | 1.0           | <i>p &lt; 0.001</i> |
| CCR3                             | 1.8          | <i>p &lt; 0.001</i> | 1.2           | <i>p &lt; 0.001</i> | 1.2     | <i>p &lt; 0.001</i> | 1.2         | <i>p &lt; 0.001</i> | 1.2           |                     |
| CCR4                             | 1.2          |                     | 1.2           |                     | 1.2     |                     | 1.2         |                     | 1.2           |                     |
| CCR5 (CCR5)                      | 1.2          |                     | 1.2           |                     | 1.2     |                     | 1.2         |                     | 1.2           |                     |
| CCR6                             | 1.2          |                     | 1.2           |                     | 1.2     |                     | 1.2         |                     | 1.2           |                     |
| CCR7 (CCR7)                      | 1.2          |                     | 1.2           |                     | 1.2     |                     | 1.2         |                     | 1.2           |                     |
| <b>XCR</b>                       |              |                     |               |                     |         |                     |             |                     |               |                     |
| XCR1                             | 1.5          |                     | 1.2           |                     | 1.5     |                     | 1.5         |                     | 1.4           |                     |
| <b>CCR2C</b>                     |              |                     |               |                     |         |                     |             |                     |               |                     |
| CCR2C                            | 2.0          | <i>p &lt; 0.001</i> | 2.1           |                     | 1.4     |                     | 1.2         |                     | 1.5           |                     |
| <b>Chitinase and FIZZ Family</b> |              |                     |               |                     |         |                     |             |                     |               |                     |
| CHI3                             | 1.1          |                     | 1.0           |                     | 1.0     |                     | 1.0         |                     | 1.0           |                     |
| CHI3L1 (CHI3L1)                  | 1.1          |                     | 1.0           | <i>p &lt; 0.001</i> | 1.0     |                     | 1.0         |                     | 1.0           |                     |
| CHI3L2 (CHI3L2)                  | 1.0          |                     | 1.0           |                     | 1.0     |                     | 1.0         |                     | 1.0           |                     |
| <b>CTL/NK Cell Associated</b>    |              |                     |               |                     |         |                     |             |                     |               |                     |
| KIR2DL4                          | 1.2          |                     | 1.2           |                     | 1.2     |                     | 1.0         | <i>p &lt; 0.001</i> | 1.0           |                     |
| KIR3DL1                          | 1.2          |                     | 1.2           |                     | 1.2     |                     | 1.2         |                     | 1.2           |                     |
| KIR3DL2                          | 1.2          |                     | 1.2           |                     | 1.2     |                     | 1.2         |                     | 1.2           |                     |
| KIR3DL3                          | 1.2          | <i>p &lt; 0.001</i> | 1.2           | <i>p &lt; 0.001</i> | 1.0     |                     | 1.1         | <i>p &lt; 0.001</i> | 1.1           |                     |
| <b>Eosinophil Associated</b>     |              |                     |               |                     |         |                     |             |                     |               |                     |
| EBI3                             | 1.1          |                     | 1.1           |                     | 10.2    | <i>p &lt; 0.001</i> | 0.7         | <i>p &lt; 0.001</i> | 0.7           |                     |
| <b>Immunoglobulin Associated</b> |              |                     |               |                     |         |                     |             |                     |               |                     |
| IGHA1                            | 1.2          |                     | 1.2           |                     | 1.1     |                     | 1.2         | <i>p &lt; 0.001</i> | 1.2           |                     |
| IGHB                             | 1.0          |                     | 1.0           | <i>p &lt; 0.001</i> | 1.0     | <i>p &lt; 0.001</i> | 1.0         | <i>p &lt; 0.001</i> | 1.0           | <i>p &lt; 0.001</i> |
| IGKC                             | 1.0          | <i>p &lt; 0.001</i> | 1.0           | <i>p &lt; 0.001</i> | 1.0     | <i>p &lt; 0.001</i> | 1.0         | <i>p &lt; 0.001</i> | 1.0           | <i>p &lt; 0.001</i> |
| IGLC1                            | 1.0          |                     | 1.0           |                     | 1.0     |                     | 1.0         |                     | 1.0           | <i>p &lt; 0.001</i> |
| IGLC2                            | 1.0          |                     | 1.0           |                     | 1.0     |                     | 1.0         |                     | 1.0           |                     |
| IGLC3                            | 1.0          |                     | 1.0           |                     | 1.0     |                     | 1.0         |                     | 1.0           |                     |
| IGLC4                            | 1.0          |                     | 1.0           |                     | 1.0     |                     | 1.0         |                     | 1.0           |                     |
| IGLC5                            | 1.0          |                     | 1.0           |                     | 1.0     |                     | 1.0         |                     | 1.0           |                     |
| IGLC6                            | 1.0          |                     | 1.0           |                     | 1.0     |                     | 1.0         |                     | 1.0           |                     |
| IGLC7                            | 1.0          |                     | 1.0           |                     | 1.0     |                     | 1.0         |                     | 1.0           |                     |
| IGLC8                            | 1.0          |                     | 1.0           |                     | 1.0     |                     | 1.0         |                     | 1.0           |                     |
| IGLC9                            | 1.0          |                     | 1.0           |                     | 1.0     |                     | 1.0         |                     | 1.0           |                     |
| IGLC10                           | 1.0          |                     | 1.0           |                     | 1.0     |                     | 1.0         |                     | 1.0           |                     |
| <b>Inflammation</b>              |              |                     |               |                     |         |                     |             |                     |               |                     |
| IL1A                             | 1.0          |                     | 1.0           | <i>p &lt; 0.001</i> | 1.0     |                     | 1.0         |                     | 1.0           | <i>p &lt; 0.001</i> |
| IL1B                             | 1.0          |                     | 1.0           |                     | 1.0     |                     | 1.0         | <i>p &lt; 0.001</i> | 1.0           | <i>p &lt; 0.001</i> |
| IL2                              | 1.0          | <i>p &lt; 0.001</i> | 1.0           |                     | 1.0     |                     | 1.0         | <i>p &lt; 0.001</i> | 1.0           |                     |
| IL6                              | 1.0          | <i>p &lt; 0.001</i> | 1.0           |                     | 1.0     |                     | 1.1         | <i>p &lt; 0.001</i> | 1.1           |                     |
| IL8                              | 1.0          |                     | 1.0           |                     | 1.0     |                     | 1.0         |                     | 1.0           |                     |
| <b>Mast Cell Associated</b>      |              |                     |               |                     |         |                     |             |                     |               |                     |
| CD44                             | 1.2          |                     | 1.1           |                     | 1.2     |                     | 1.2         |                     | 1.1           |                     |
| CD44L                            | 1.0          | <i>p &lt; 0.001</i> | 1.0           |                     | 1.0     | <i>p &lt; 0.001</i> | 1.0         | <i>p &lt; 0.001</i> | 1.0           | <i>p &lt; 0.001</i> |
| CD47                             | 1.0          | <i>p &lt; 0.001</i> | 1.0           |                     | 1.1     | <i>p &lt; 0.001</i> | 1.1         | <i>p &lt; 0.001</i> | 1.2           | <i>p &lt; 0.001</i> |
| CD63                             | 1.0          |                     | 1.0           |                     | 1.0     |                     | 1.0         |                     | 1.0           |                     |
| TPSAB1 (MC-Trypt)                | 1.0          |                     | 1.4           |                     | 5.0     | <i>p &lt; 0.001</i> | 17.5        | <i>p &lt; 0.001</i> | 5.7           | <i>p &lt; 0.001</i> |



Table S5. LMER 7 DM vs Control

|                          |              | 1000 locules | 10000 locules | Control | 1000 locules | 10000 locules |
|--------------------------|--------------|--------------|---------------|---------|--------------|---------------|
|                          | Gene         | FCR          | FCR           | FCR     | FCR          | FCR           |
| Surface Receptors        | GLY1         | 2.0          | 2.0           | 2.0     | 2.0          | 2.0           |
|                          | MAP2K22BCL1  | 2.0          | 2.0           | 2.0     | 2.0          | 2.0           |
|                          |              | 2.0          | 2.0           | 2.0     | 2.0          | 2.0           |
| SOC1/FRAS                | MAP2K1       | 2.0          | 2.0           | 2.0     | 2.0          | 2.0           |
|                          | MAP2K3       | 2.0          | 2.0           | 2.0     | 2.0          | 2.0           |
|                          | MAP2K4       | 2.0          | 2.0           | 2.0     | 2.0          | 2.0           |
|                          | MAP2K5       | 2.0          | 2.0           | 2.0     | 2.0          | 2.0           |
| Intracellular Signaling  | MAP          | 2.0          | 2.0           | 2.0     | 2.0          | 2.0           |
|                          | MAP          | 2.0          | 2.0           | 2.0     | 2.0          | 2.0           |
|                          |              | 2.0          | 2.0           | 2.0     | 2.0          | 2.0           |
| Transcription Factors    | MYB1         | 2.0          | 2.0           | 2.0     | 2.0          | 2.0           |
|                          | MYB2         | 2.0          | 2.0           | 2.0     | 2.0          | 2.0           |
|                          | MYB3         | 2.0          | 2.0           | 2.0     | 2.0          | 2.0           |
|                          | MYB4         | 2.0          | 2.0           | 2.0     | 2.0          | 2.0           |
|                          | MYB5         | 2.0          | 2.0           | 2.0     | 2.0          | 2.0           |
|                          | MYB6         | 2.0          | 2.0           | 2.0     | 2.0          | 2.0           |
| TH2-Associated Cytokines | CD201/IL21R1 | 2.0          | 2.0           | 2.0     | 2.0          | 2.0           |
|                          | IL2          | 2.0          | 2.0           | 2.0     | 2.0          | 2.0           |
|                          | IL3          | 2.0          | 2.0           | 2.0     | 2.0          | 2.0           |
|                          | IL4          | 2.0          | 2.0           | 2.0     | 2.0          | 2.0           |
|                          | IL5          | 2.0          | 2.0           | 2.0     | 2.0          | 2.0           |
|                          | IL6          | 2.0          | 2.0           | 2.0     | 2.0          | 2.0           |
|                          | IL7          | 2.0          | 2.0           | 2.0     | 2.0          | 2.0           |
|                          | IL12         | 2.0          | 2.0           | 2.0     | 2.0          | 2.0           |
|                          | IL13         | 2.0          | 2.0           | 2.0     | 2.0          | 2.0           |
|                          | IL17         | 2.0          | 2.0           | 2.0     | 2.0          | 2.0           |
| Cytokine Receptors       | IL2R         | 2.0          | 2.0           | 2.0     | 2.0          | 2.0           |
|                          | IL3R1        | 2.0          | 2.0           | 2.0     | 2.0          | 2.0           |
|                          | IL3R2        | 2.0          | 2.0           | 2.0     | 2.0          | 2.0           |
|                          | IL6R         | 2.0          | 2.0           | 2.0     | 2.0          | 2.0           |
| Miscellaneous            | MAP2K4/SH2B3 | 2.0          | 2.0           | 2.0     | 2.0          | 2.0           |
|                          | MAP2K4/SH2B3 | 2.0          | 2.0           | 2.0     | 2.0          | 2.0           |
| SOC1/FRAS                | MAP1         | 2.0          | 2.0           | 2.0     | 2.0          | 2.0           |
|                          | MAP2         | 2.0          | 2.0           | 2.0     | 2.0          | 2.0           |
|                          | MAP3         | 2.0          | 2.0           | 2.0     | 2.0          | 2.0           |
|                          | MAP4         | 2.0          | 2.0           | 2.0     | 2.0          | 2.0           |
| Surface Receptors        | CD204/CD204L | 2.0          | 2.0           | 2.0     | 2.0          | 2.0           |
|                          | CD204/CD204L | 2.0          | 2.0           | 2.0     | 2.0          | 2.0           |

Table S3. LMER 7 DM vs Control

| Gene                  | 1000 locuses |            | 10000 locuses |            | Control |            | 1000 locuses |            | 10000 locuses |            |
|-----------------------|--------------|------------|---------------|------------|---------|------------|--------------|------------|---------------|------------|
|                       | beta         | sigma      | beta          | sigma      | beta    | sigma      | beta         | sigma      | beta          | sigma      |
| TH2-Associated        |              |            |               |            |         |            |              |            |               |            |
| Transcription Factors |              |            |               |            |         |            |              |            |               |            |
| STAT2                 | 1.2          |            | 1.2           |            | 1.2     |            | 1.1          |            | 1.1           |            |
| STAT3                 | -1.3         | beta (0.2) | -1.5          |            | -1.5    |            | -1.6         |            | -1.1          |            |
| STAT4                 | 1.3          | beta (0.2) | 1.3           |            | 1.3     |            | 1.2          |            | 1.4           |            |
| STAT5A                | 1.2          | beta (0.2) | 1.2           |            | 1.2     |            | 1.2          | beta (0.2) | 1.3           | beta (0.2) |
| STAT5B                | 1.1          |            | 1.1           |            | 1.1     |            | 1.1          |            | 1.1           |            |
| STAT6                 | 1.1          | beta (0.2) | 1.1           | beta (0.2) | 1.1     |            | 1.1          | beta (0.2) | 1.1           | beta (0.2) |
| TH2 Associated        |              |            |               |            |         |            |              |            |               |            |
| STAT1                 | 1.3          |            | 1.3           |            | 1.3     |            | 1.1          | beta (0.2) | 1.2           |            |
| STAT2                 | 1.2          | beta (0.2) | 1.1           | beta (0.2) | 1.2     | beta (0.2) | 1.2          | beta (0.2) | 1.2           | beta (0.2) |
| STAT3                 | -1.2         |            | -1.2          |            | -1.2    |            | -1.2         |            | -1.2          |            |
| STAT4                 | 1.1          | beta (0.2) | 1.2           |            | 1.2     | beta (0.2) | 1.2          | beta (0.2) | 1.2           |            |
| STAT5A                | 1.2          |            | 1.2           |            | 1.2     |            | 1.2          |            | 1.2           |            |
| STAT5B                | 1.2          |            | 1.2           |            | 1.2     |            | 1.2          |            | 1.2           |            |
| STAT6                 | 1.2          |            | 1.2           |            | 1.2     |            | 1.2          |            | 1.2           |            |
| VA Regulated          |              |            |               |            |         |            |              |            |               |            |
| STAT1                 | 1.2          |            | 1.2           |            | 1.2     |            | 1.2          |            | 1.2           |            |
| STAT2                 | 1.2          |            | 1.2           |            | 1.2     |            | 1.2          |            | 1.2           |            |
| STAT3                 | 1.2          |            | 1.2           |            | 1.2     |            | 1.2          |            | 1.2           |            |
| STAT4                 | 1.2          |            | 1.2           |            | 1.2     |            | 1.2          |            | 1.2           |            |
| STAT5A                | 1.2          |            | 1.2           |            | 1.2     |            | 1.2          |            | 1.2           |            |
| STAT5B                | 1.2          |            | 1.2           |            | 1.2     |            | 1.2          |            | 1.2           |            |

Table S3: Liver 7 DAJ vs Infected

|                             |                 | 1000000 reads | 1000000 reads |
|-----------------------------|-----------------|---------------|---------------|
|                             | Probe           | Probe         | Probe         |
| <b>Alarmin/Activated Mo</b> |                 |               |               |
|                             | CD3E            | -1.0          | -1.0          |
|                             | CD8A            | -1.9          | -1.9          |
|                             | CD8B.1 (CD8A.1) | -1.4          | -1.2          |
|                             | CD8B            | -1.2          | -1.1          |
|                             | CD8A.6 (CD8A.1) | -1.6          | -1.6          |
|                             | CD8A            | -1.5          | -1.5          |
| <b>Chemokine</b>            |                 |               |               |
| <b>CCL Chemokines</b>       |                 |               |               |
|                             | CCL2 (MIP1A)    | -1.2          | -1.1          |
|                             | CCL3 (MIP1B)    | -1.2          | -1.2          |
|                             | CCL4 (MIP1D)    | -1.1          | -1.0          |
|                             | CCL5 (RANTES)   | -1.9          | -2.0          |
|                             | CCL6 (MIP2)     | -1.7          | -1.5          |
|                             | CCL7 (MIP3)     | -1.1          | -1.0          |
|                             | CCL8 (MIP1C)    | -1.1          | -1.0          |
|                             | CCL9 (MIP1E)    | -1.9          | -1.7          |
|                             | CCL10 (MIP3B)   | -1.8          | -1.1          |
|                             | CCL11 (MIP1F)   | -1.8          | -1.9          |
|                             | CCL12 (MIP1G)   | -1.6          | -1.6          |
|                             | CCL13 (MIP1H)   | -1.5          | -1.6          |
|                             | CCL14 (MIP1I)   | -1.5          | -1.5          |
|                             | CCL15 (MIP1J)   | -1.6          | -1.6          |
|                             | CCL16 (MIP1K)   | -1.5          | -1.4          |
|                             | CCL17 (MIP1L)   | -1.2          | -1.2          |
|                             | CCL18 (MIP1M)   | -1.9          | -1.9          |
|                             | CCL19 (MIP1N)   | -2.0          | -1.9          |
|                             | CCL20 (MIP1O)   | -2.0          | -1.9          |
|                             | CCL21 (MIP1P)   | -1.6          | -1.6          |
|                             | CCL22 (MIP1Q)   | -1.6          | -1.6          |
|                             | CCL23 (MIP1R)   | -1.5          | -1.5          |
|                             | CCL24 (MIP1S)   | -1.5          | -1.5          |
|                             | CCL25 (MIP1T)   | -1.5          | -1.5          |
|                             | CCL26 (MIP1U)   | -1.8          | -1.6          |
|                             | CCL27 (MIP1V)   | -1.6          | -1.6          |
|                             | CCL28 (MIP1W)   | -1.1          | -1.1          |
| <b>CXC</b>                  |                 |               |               |
|                             | CXCL2           | -1.8          | -1.1          |
|                             | CXCL3 (MIP2)    | -1.1          | -1.1          |
|                             | CXCL4           | -1.4          | -1.4          |
|                             | CXCL5 (MIP3A)   | -1.9          | -1.9          |
|                             | CXCL6 (MIP3C)   | -1.9          | -1.9          |
|                             | CXCL7 (MIP3D)   | -1.4          | -1.4          |
|                             | CXCL8 (MIP3E)   | -1.9          | -1.9          |
|                             | CXCL9 (MIP3F)   | -1.4          | -1.4          |
|                             | CXCL10 (MIP3G)  | -1.5          | -1.6          |
|                             | CXCL11 (MIP3H)  | -1.5          | -1.6          |
|                             | CXCL12 (MIP3I)  | -1.6          | -1.6          |
|                             | CXCL13 (MIP3J)  | -1.8          | -1.1          |
|                             | CXCL14 (MIP3K)  | -1.9          | -1.9          |
|                             | CXCL15 (MIP3L)  | -1.9          | -1.9          |
| <b>XCL</b>                  |                 |               |               |
|                             | XCCL1           | -1.1          | -1.1          |
| <b>Chemokine Receptors</b>  |                 |               |               |
| <b>CCR</b>                  |                 |               |               |
|                             | CCR2            | -1.1          | -1.0          |
|                             | CCR3            | -1.1          | -1.0          |
|                             | CCR4            | -1.1          | -1.2          |
|                             | CCR5            | -1.1          | -1.1          |
|                             | CCR6            | -1.1          | -1.1          |
|                             | CCR7            | -1.2          | -1.1          |

Liver 7 DAJ vs Non-Infected ATRA Control

|                             | 1000000 reads   | 1000000 reads |      |
|-----------------------------|-----------------|---------------|------|
|                             | Probe           | Probe         |      |
| <b>Alarmin/Activated Mo</b> |                 |               |      |
|                             | CD3E            | -2.1          | -1.1 |
|                             | CD8A            | -2.0          | -1.3 |
|                             | CD8B.1 (CD8A.1) | -1.1          | -1.2 |
|                             | CD8B            | -1.2          | -1.2 |
|                             | CD8A.6 (CD8A.1) | -2.4          | -1.2 |
|                             | CD8A            | -1.0          | -1.0 |
| <b>Chemokine</b>            |                 |               |      |
| <b>CCL Chemokines</b>       |                 |               |      |
|                             | CCL2 (MIP1A)    | -1.1          | -1.0 |
|                             | CCL3 (MIP1B)    | -1.0          | -1.1 |
|                             | CCL4 (MIP1D)    | -1.0          | -1.1 |
|                             | CCL5 (RANTES)   | -1.2          | -1.2 |
|                             | CCL6 (MIP2)     | -1.2          | -1.1 |
|                             | CCL7 (MIP3)     | -1.3          | -1.1 |
|                             | CCL8 (MIP1C)    | -1.3          | -1.2 |
|                             | CCL9 (MIP1E)    | -1.6          | -1.1 |
|                             | CCL10 (MIP3B)   | -1.1          | -1.1 |
|                             | CCL11 (MIP1F)   | -1.1          | -1.1 |
|                             | CCL12 (MIP1G)   | -1.2          | -1.2 |
|                             | CCL13 (MIP1H)   | -1.2          | -1.2 |
|                             | CCL14 (MIP1I)   | -1.2          | -1.2 |
|                             | CCL15 (MIP1J)   | -1.2          | -1.2 |
|                             | CCL16 (MIP1K)   | -1.2          | -1.2 |
|                             | CCL17 (MIP1L)   | -1.2          | -1.2 |
|                             | CCL18 (MIP1M)   | -1.2          | -1.2 |
|                             | CCL19 (MIP1N)   | -1.2          | -1.2 |
|                             | CCL20 (MIP1O)   | -1.2          | -1.2 |
|                             | CCL21 (MIP1P)   | -1.1          | -1.1 |
|                             | CCL22 (MIP1Q)   | -1.1          | -1.1 |
|                             | CCL23 (MIP1R)   | -1.1          | -1.1 |
|                             | CCL24 (MIP1S)   | -1.1          | -1.1 |
|                             | CCL25 (MIP1T)   | -1.1          | -1.1 |
|                             | CCL26 (MIP1U)   | -1.1          | -1.1 |
|                             | CCL27 (MIP1V)   | -1.1          | -1.1 |
|                             | CCL28 (MIP1W)   | -1.1          | -1.1 |
| <b>CXC</b>                  |                 |               |      |
|                             | CXCL2           | -1.0          | -1.5 |
|                             | CXCL3 (MIP2)    | -1.0          | -1.0 |
|                             | CXCL4           | -1.0          | -1.0 |
|                             | CXCL5 (MIP3A)   | -1.0          | -1.0 |
|                             | CXCL6 (MIP3C)   | -1.0          | -1.0 |
|                             | CXCL7 (MIP3D)   | -1.0          | -1.0 |
|                             | CXCL8 (MIP3E)   | -1.0          | -1.0 |
|                             | CXCL9 (MIP3F)   | -1.0          | -1.0 |
|                             | CXCL10 (MIP3G)  | -1.0          | -1.0 |
|                             | CXCL11 (MIP3H)  | -1.0          | -1.0 |
|                             | CXCL12 (MIP3I)  | -1.0          | -1.0 |
|                             | CXCL13 (MIP3J)  | -1.0          | -1.0 |
|                             | CXCL14 (MIP3K)  | -1.0          | -1.0 |
|                             | CXCL15 (MIP3L)  | -1.0          | -1.0 |
|                             | CXCL16 (MIP3M)  | -1.0          | -1.0 |
| <b>XCL</b>                  |                 |               |      |
|                             | XCCL1           | -1.0          | -1.0 |
| <b>Chemokine Receptors</b>  |                 |               |      |
| <b>CCR</b>                  |                 |               |      |
|                             | CCR2            | -1.3          | -1.3 |
|                             | CCR3            | -1.3          | -1.3 |
|                             | CCR4            | -1.3          | -1.3 |
|                             | CCR5            | -1.3          | -1.3 |
|                             | CCR6            | -1.3          | -1.3 |
|                             | CCR7            | -1.3          | -1.3 |

| Table S3 Lister 7 DA vs Infected |                   | 1000 control |               | 10000 control |             | Lister 7 DA vs Non-Infected ATRA Control |  | 1000 control |               | 10000 control |             |
|----------------------------------|-------------------|--------------|---------------|---------------|-------------|------------------------------------------|--|--------------|---------------|---------------|-------------|
|                                  | Gene              | FC           | p-value       | FC            | p-value     |                                          |  | FC           | p-value       | FC            | p-value     |
| Chemokine Receptors              | CCR1              | 2.0          |               | 2.0           | $p < 0.001$ |                                          |  | 2.0          |               | 2.1           |             |
|                                  | CCR2              | 1.2          |               | 1.0           |             |                                          |  | 1.0          |               | 1.1           |             |
|                                  | CCR3              | 1.1          |               | 1.1           |             |                                          |  | 1.2          |               | 1.2           |             |
| CCR                              | CCR1 (p < 0.05)   | 2.1          |               | 2.0           |             |                                          |  | 2.1          |               | 2.1           |             |
|                                  | CCR2 (p < 0.05)   | 1.1          |               | 1.1           |             |                                          |  | 1.1          |               | 1.1           |             |
|                                  | CCR3              | 1.2          |               | 1.2           |             |                                          |  | 1.2          |               | 1.2           |             |
|                                  | CCR4              | 1.2          |               | 1.1           |             |                                          |  | 1.2          |               | 1.2           |             |
|                                  | CCR5              | 1.2          |               | 1.1           |             |                                          |  | 1.2          |               | 1.2           |             |
|                                  | CCR6              | 1.2          |               | 1.1           |             |                                          |  | 1.2          | $p < 0.001$   | 1.2           |             |
| CCR                              | CCR1-CCR2         | 1.1          |               | 1.1           |             |                                          |  | 1.1          |               | 1.1           |             |
|                                  | CCR2              | 1.2          |               | 1.2           |             |                                          |  | 1.2          |               | 1.2           |             |
| CCR                              | CCR2              | 1.2          |               | 1.2           |             |                                          |  | 1.2          | $p < 0.001$   | 1.2           |             |
|                                  | CCR3              | 1.2          |               | 1.1           |             |                                          |  | 1.2          |               | 1.2           |             |
| Chitinase and FIZZ Family        | CHI3L1            | 1.1          |               | 1.1           |             |                                          |  | 1.0          |               | 1.0           |             |
|                                  | CHI3L1 (p < 0.05) | 1.1          |               | 1.1           |             |                                          |  | 1.0          |               | 1.0           |             |
|                                  | CHI3L2            | 1.1          |               | 1.1           |             |                                          |  | 1.0          |               | 1.0           |             |
|                                  | CHI3L3            | 1.1          |               | 1.1           |             |                                          |  | 1.0          |               | 1.0           |             |
| CTL/NK Cell Associated           | CD8A              | 1.0          | $p < 0.001$   | 1.0           |             |                                          |  | 1.0          | $p < 0.001$   | 1.0           |             |
|                                  | CD8B              | 1.0          |               | 1.0           |             |                                          |  | 1.1          |               | 1.0           |             |
|                                  | CD8A (p < 0.05)   | 1.1          |               | 1.1           |             |                                          |  | 1.1          |               | 1.1           |             |
| Eosinophil Associated            | EBI1              | 1.1          |               | 1.1           |             |                                          |  | 1.1          |               | 1.1           |             |
|                                  | EBI2              | 1.1          |               | 1.1           |             |                                          |  | 1.1          |               | 1.1           |             |
|                                  | EBI3              | 1.1          |               | 1.1           |             |                                          |  | 1.1          | $p < 0.001$   | 1.1           |             |
| Immunoglobulin Associated        | IGHA1             | 1.1          | $p < 0.00001$ | 1.1           |             |                                          |  | 1.1          | $p < 0.00001$ | 1.1           |             |
|                                  | IGHB              | 1.1          |               | 1.1           |             |                                          |  | 1.1          |               | 1.1           |             |
|                                  | IGHG1             | 1.0          |               | 1.0           | $p < 0.001$ |                                          |  | 1.0          | $p < 0.00001$ | 1.0           | $p < 0.001$ |
|                                  | IGHG2             | 1.0          |               | 1.0           |             |                                          |  | 1.0          | $p < 0.001$   | 1.0           |             |
|                                  | IGHG3             | 1.0          |               | 1.0           |             |                                          |  | 1.0          | $p < 0.00001$ | 1.0           |             |
|                                  | IGHG4             | 1.0          |               | 1.0           |             |                                          |  | 1.0          | $p < 0.00001$ | 1.0           |             |
|                                  | IGHG5             | 1.0          |               | 1.0           |             |                                          |  | 1.0          | $p < 0.00001$ | 1.0           |             |
|                                  | IGHM              | 1.0          |               | 1.0           | $p < 0.001$ |                                          |  | 1.0          | $p < 0.00001$ | 1.0           | $p < 0.001$ |
|                                  | IGHX              | 1.0          |               | 1.0           | $p < 0.001$ |                                          |  | 1.0          | $p < 0.001$   | 1.0           |             |
|                                  | IGHA2             | 1.0          |               | 1.0           |             |                                          |  | 1.0          | $p < 0.001$   | 1.0           |             |
| Inflammation                     | IL1B              | 1.1          |               | 1.1           |             |                                          |  | 1.0          |               | 1.0           |             |
|                                  | IL1A              | 1.1          | $p < 0.001$   | 1.1           |             |                                          |  | 1.1          |               | 1.1           |             |
|                                  | IL12A             | 1.1          |               | 1.1           |             |                                          |  | 1.1          |               | 1.1           |             |
|                                  | IL12B             | 1.1          | $p < 0.001$   | 1.1           |             |                                          |  | 1.1          |               | 1.1           |             |
| Mast Cell Associated             | CD44              | 1.1          |               | 1.1           |             |                                          |  | 1.1          |               | 1.1           |             |
|                                  | CD44 (p < 0.05)   | 1.1          |               | 1.1           |             |                                          |  | 1.1          | $p < 0.001$   | 1.1           | $p < 0.001$ |
|                                  | CD45              | 1.1          |               | 1.1           |             |                                          |  | 1.1          |               | 1.1           |             |
|                                  | CD45 (p < 0.05)   | 1.1          |               | 1.1           |             |                                          |  | 1.1          |               | 1.1           |             |
| TSSA81 (MC tss81)                | TSSA81            | 1.0          | $p = 0.009$   | 1.0           |             |                                          |  | 1.0          | $p < 0.005$   | 1.0           | $p < 0.005$ |
|                                  | TSSA81 (MC tss81) | 1.0          | $p = 0.009$   | 1.0           |             |                                          |  | 1.0          | $p < 0.005$   | 1.0           | $p < 0.005$ |

| Table S3 Liver 7 DM vs Infected               |                  | 100k reads |         | 1000k reads |         | Liver 7 DM vs Non-Infected ATRA Control |  | 100k reads |         | 1000k reads |         |
|-----------------------------------------------|------------------|------------|---------|-------------|---------|-----------------------------------------|--|------------|---------|-------------|---------|
|                                               | Gene             | Fold       | P-value | Fold        | P-value |                                         |  | Fold       | P-value | Fold        | P-value |
| Mac                                           | CD8E             | 2.4        |         | 2.1         |         |                                         |  | 2.1        |         | 2.0         |         |
|                                               | CD8B             | 2.2        |         | 2.1         |         |                                         |  | 2.2        |         | 2.0         |         |
|                                               | LAG3             | 1.2        |         | 1.1         |         |                                         |  | 1.0        |         | 1.0         |         |
|                                               | CD8A             | 1.8        |         | 1.5         |         |                                         |  | 1.0        |         | 1.0         |         |
|                                               | CD8D             | 1.4        | p=0.008 | 2.0         |         |                                         |  | 2.0        |         | 2.1         |         |
|                                               | CD8A1 (CD8A)     | 1.1        |         | 1.2         |         |                                         |  | 1.0        |         | 1.0         |         |
|                                               | CD8B1 (CD8B)     | 1.1        |         | 1.0         |         |                                         |  | 1.0        |         | 1.0         |         |
|                                               | CD8DAP1 (CD8D)   | 1.1        |         | 1.0         |         |                                         |  | 1.0        |         | 1.0         |         |
|                                               | CD8DAP2 (CD8D)   | 1.1        |         | 1.0         |         |                                         |  | 1.0        |         | 1.0         |         |
|                                               | CD8DAP3 (CD8D)   | 1.1        |         | 1.0         |         |                                         |  | 1.0        |         | 1.0         |         |
|                                               | CD8DAP4 (CD8D)   | 1.1        |         | 1.0         |         |                                         |  | 1.0        |         | 1.0         |         |
|                                               | CD8DAP5 (CD8D)   | 1.1        |         | 1.0         |         |                                         |  | 1.0        |         | 1.0         |         |
|                                               | CD8DAP6 (CD8D)   | 1.1        |         | 1.0         |         |                                         |  | 1.0        |         | 1.0         |         |
|                                               | CD8DAP7 (CD8D)   | 1.1        |         | 1.0         |         |                                         |  | 1.0        |         | 1.0         |         |
|                                               | CD8DAP8 (CD8D)   | 1.1        |         | 1.0         |         |                                         |  | 1.0        |         | 1.0         |         |
| Prostaglandin/Leukotriene                     | PTGS2            | 2.2        |         | 2.2         |         |                                         |  | 2.1        |         | 2.2         |         |
|                                               | PTGS1            | 2.2        |         | 2.2         |         |                                         |  | 2.2        |         | 2.0         |         |
|                                               | COX2             | 2.2        |         | 2.2         |         |                                         |  | 2.2        |         | 2.0         |         |
|                                               | CD32             | 1.1        |         | 1.0         |         |                                         |  | 1.1        |         | 1.2         |         |
|                                               | CD3E             | 1.1        |         | 1.0         |         |                                         |  | 1.0        |         | 1.0         |         |
|                                               | CD3EAP (CD3E)    | 1.0        |         | 1.1         |         |                                         |  | 1.1        |         | 1.1         |         |
| T Cell Costimulatory Accessory Cell Expressed | CD274 (BTLA1)    | 1.0        |         | 1.0         |         |                                         |  | 1.0        |         | 1.1         |         |
|                                               | CD273 (BTLA2)    | 1.0        |         | 1.1         |         |                                         |  | 1.0        |         | 1.1         |         |
|                                               | CD272 (BTLA3)    | 1.1        |         | 1.1         |         |                                         |  | 1.0        |         | 1.0         |         |
|                                               | CD271 (BTLA4)    | 1.1        |         | 1.0         |         |                                         |  | 1.0        |         | 1.0         |         |
|                                               | CD270 (BTLA5)    | 1.1        |         | 1.0         |         |                                         |  | 1.0        |         | 1.1         |         |
|                                               | CD274IP1 (BTLA1) | 1.0        |         | 1.0         |         |                                         |  | 1.0        |         | 1.1         |         |
|                                               | CD274IP2 (BTLA1) | 1.0        |         | 1.0         |         |                                         |  | 1.0        |         | 1.1         |         |
|                                               | CD274IP3 (BTLA1) | 1.0        |         | 1.0         |         |                                         |  | 1.0        |         | 1.1         |         |
|                                               | CD274IP4 (BTLA1) | 1.0        |         | 1.0         |         |                                         |  | 1.0        |         | 1.1         |         |
|                                               | CD274IP5 (BTLA1) | 1.0        |         | 1.0         |         |                                         |  | 1.0        |         | 1.1         |         |
| T Cell Expressed                              | CD3E             | 1.1        |         | 1.1         |         |                                         |  | 1.0        |         | 1.0         |         |
|                                               | CD3D             | 1.1        |         | 1.1         |         |                                         |  | 1.0        |         | 1.0         |         |
|                                               | CD3EAP           | 1.0        |         | 1.0         |         |                                         |  | 1.0        |         | 1.0         |         |
|                                               | CD3EAP (CD3E)    | 1.0        |         | 1.0         |         |                                         |  | 1.0        |         | 1.0         |         |
| Th1-Associated Cytokines                      | IFNG (IFN)       | 1.0        |         | 1.0         |         |                                         |  | 1.1        |         | 1.1         |         |
|                                               | IFNG1            | 1.0        |         | 1.0         |         |                                         |  | 1.1        |         | 1.1         |         |
|                                               | IFNG2            | 1.0        |         | 1.0         |         |                                         |  | 1.1        |         | 1.1         |         |
|                                               | IFNG3            | 1.0        |         | 1.0         |         |                                         |  | 1.1        |         | 1.1         |         |
|                                               | IFNG4            | 1.0        |         | 1.0         |         |                                         |  | 1.1        |         | 1.1         |         |
|                                               | IFNG5            | 1.0        |         | 1.0         |         |                                         |  | 1.1        |         | 1.1         |         |



| Table S3: L1er 7 DA vs Infected |                              | 10K1 uninfected |      | 10K101 uninfected |      | L1er 7 DA vs Non-Infected ATRA Control |      | 10K1 uninfected |      | 10K101 uninfected |  |
|---------------------------------|------------------------------|-----------------|------|-------------------|------|----------------------------------------|------|-----------------|------|-------------------|--|
|                                 | Gene                         | fold            | log2 | fold              | log2 |                                        | fold | log2            | fold | log2              |  |
| Surface Receptors               | <b>CD28</b>                  | -1.5            | -0.5 |                   |      |                                        | -1.5 | -0.5            |      |                   |  |
|                                 | <b>CD28 (229-2)</b>          | -1.5            | -0.5 |                   |      |                                        | -1.5 | -0.5            |      |                   |  |
| SOCS/PIAS                       | <b>SOCS1</b>                 | -1.5            | -0.5 |                   |      |                                        | -1.5 | -0.5            |      |                   |  |
|                                 | <b>SOCS2</b>                 | -1.5            | -0.5 |                   |      |                                        | -1.5 | -0.5            |      |                   |  |
|                                 | <b>SOCS3</b>                 | -1.5            | -0.5 |                   |      |                                        | -1.5 | -0.5            |      |                   |  |
|                                 | <b>SOCS4</b>                 | -1.5            | -0.5 |                   |      |                                        | -1.5 | -0.5            |      |                   |  |
| Intracellular Signaling         | <b>SH2</b>                   | -1.5            | -0.5 |                   |      |                                        | -1.5 | -0.5            |      |                   |  |
|                                 | <b>SH3</b>                   | -1.5            | -0.5 |                   |      |                                        | -1.5 | -0.5            |      |                   |  |
| Transcription Factors           | <b>STAT1</b>                 | -1.5            | -0.5 |                   |      |                                        | -1.5 | -0.5            |      |                   |  |
|                                 | <b>STAT2</b>                 | -1.5            | -0.5 |                   |      |                                        | -1.5 | -0.5            |      |                   |  |
|                                 | <b>STAT3</b>                 | -1.5            | -0.5 |                   |      |                                        | -1.5 | -0.5            |      |                   |  |
|                                 | <b>STAT4</b>                 | -1.5            | -0.5 |                   |      |                                        | -1.5 | -0.5            |      |                   |  |
|                                 | <b>STAT5</b>                 | -1.5            | -0.5 |                   |      |                                        | -1.5 | -0.5            |      |                   |  |
| TH2-Associated Cytokines        | <b>IL13</b>                  | -1.5            | -0.5 |                   |      |                                        | -1.5 | -0.5            |      |                   |  |
|                                 | <b>IL4</b>                   | -1.5            | -0.5 |                   |      |                                        | -1.5 | -0.5            |      |                   |  |
|                                 | <b>IL5</b>                   | -1.5            | -0.5 |                   |      |                                        | -1.5 | -0.5            |      |                   |  |
|                                 | <b>IL6</b>                   | -1.5            | -0.5 |                   |      |                                        | -1.5 | -0.5            |      |                   |  |
|                                 | <b>IL7</b>                   | -1.5            | -0.5 |                   |      |                                        | -1.5 | -0.5            |      |                   |  |
|                                 | <b>IL9</b>                   | -1.5            | -0.5 |                   |      |                                        | -1.5 | -0.5            |      |                   |  |
|                                 | <b>IL10 (229-2)</b>          | -1.5            | -0.5 |                   |      |                                        | -1.5 | -0.5            |      |                   |  |
| Cytokine Receptors              | <b>IL4R</b>                  | -1.5            | -0.5 |                   |      |                                        | -1.5 | -0.5            |      |                   |  |
|                                 | <b>IL5R1</b>                 | -1.5            | -0.5 |                   |      |                                        | -1.5 | -0.5            |      |                   |  |
|                                 | <b>IL6R1</b>                 | -1.5            | -0.5 |                   |      |                                        | -1.5 | -0.5            |      |                   |  |
|                                 | <b>IL10R1</b>                | -1.5            | -0.5 |                   |      |                                        | -1.5 | -0.5            |      |                   |  |
| Miscellaneous                   | <b>STAT3 (229-2)</b>         | -1.5            | -0.5 |                   |      |                                        | -1.5 | -0.5            |      |                   |  |
|                                 | <b>STAT3 (229-2) (229-2)</b> | -1.5            | -0.5 |                   |      |                                        | -1.5 | -0.5            |      |                   |  |
| SOCS/PIAS                       | <b>SOCS1</b>                 | -1.5            | -0.5 |                   |      |                                        | -1.5 | -0.5            |      |                   |  |
|                                 | <b>SOCS2</b>                 | -1.5            | -0.5 |                   |      |                                        | -1.5 | -0.5            |      |                   |  |
|                                 | <b>SOCS3</b>                 | -1.5            | -0.5 |                   |      |                                        | -1.5 | -0.5            |      |                   |  |
|                                 | <b>SOCS4</b>                 | -1.5            | -0.5 |                   |      |                                        | -1.5 | -0.5            |      |                   |  |
| Surface Receptors               | <b>CD28 (229-2)</b>          | -1.5            | -0.5 |                   |      |                                        | -1.5 | -0.5            |      |                   |  |

| Table S3 Liver 7 DA1 vs Infected        |         | 100 ug/kg | 1000 ug/kg       | Liver 7 DA1 vs Non-Infected ATRA Control |                  | 100 ug/kg | 1000 ug/kg       |
|-----------------------------------------|---------|-----------|------------------|------------------------------------------|------------------|-----------|------------------|
| Gene                                    | log2    | log2FC    | log2FC           | log2                                     | log2FC           | log2FC    | log2FC           |
| TNF-Associated<br>Transcription Factors | Atg16l1 | -1.5      |                  |                                          |                  | -1.5      |                  |
|                                         | Atg16l2 | -1.5      | <b>-1.6</b>      |                                          |                  | -1.5      |                  |
|                                         | Atg16l3 | -1.6      |                  |                                          |                  | -1.6      |                  |
|                                         | Atg16l4 | -1.7      | <i>p</i> < 0.001 | -1.7                                     | <i>p</i> < 0.001 | -1.7      | <i>p</i> < 0.001 |
|                                         | Atg16l5 | -1.5      |                  |                                          |                  | -1.5      |                  |
|                                         | Atg16l6 | -1.5      | <i>p</i> < 0.001 | -1.5                                     | <i>p</i> < 0.001 | -1.5      | <i>p</i> < 0.001 |
| Treg Associated                         | Atg16l1 | -1.5      | <i>p</i> < 0.001 | -1.5                                     |                  | -1.5      |                  |
|                                         | Atg16l2 | -1.5      |                  |                                          |                  | -1.5      | <i>p</i> < 0.001 |
|                                         | Atg16l3 | -1.6      |                  |                                          |                  | -1.6      |                  |
|                                         | Atg16l4 | -1.7      | <i>p</i> < 0.001 | -1.7                                     | <i>p</i> < 0.001 | -1.7      | <i>p</i> < 0.001 |
|                                         | Atg16l5 | -1.5      |                  |                                          |                  | -1.5      |                  |
|                                         | Atg16l6 | -1.5      | <i>p</i> < 0.001 | -1.5                                     | <i>p</i> < 0.001 | -1.5      | <i>p</i> < 0.001 |
| iA Regulated                            | Atg16l1 | -1.5      |                  |                                          |                  | -1.5      |                  |
|                                         | Atg16l2 | -1.5      |                  |                                          |                  | -1.5      |                  |
|                                         | Atg16l3 | -1.6      |                  |                                          |                  | -1.6      |                  |
|                                         | Atg16l4 | -1.7      | <i>p</i> < 0.001 | -1.7                                     | <i>p</i> < 0.001 | -1.7      | <i>p</i> < 0.001 |
|                                         | Atg16l5 | -1.5      |                  |                                          |                  | -1.5      |                  |
|                                         | Atg16l6 | -1.5      | <b>-1.6</b>      |                                          |                  | -1.5      | <i>p</i> < 0.001 |
