# Supplementary material
Source: PubMed Central journal article supplement (PMC2687331)
Supplement: supp_77_6_2576__4.pdf [file supp_77_6_2576__4.pdf]

Table S4 Liver 14 DAJ vs Control

|                                  | Gene             | 100 us/kg<br>Control |            | 1000 us/kg<br>Control |            | Control<br>Infected |          | 100 us/kg<br>Infected |          | 1000 us/kg<br>Infected |            |            |
|----------------------------------|------------------|----------------------|------------|-----------------------|------------|---------------------|----------|-----------------------|----------|------------------------|------------|------------|
|                                  |                  | Fold                 | $\alpha$   | Fold                  | $\alpha$   | Fold                | $\alpha$ | Fold                  | $\alpha$ | Fold                   | $\alpha$   |            |
|                                  |                  |                      |            |                       |            |                     |          |                       |          |                        |            |            |
| Alternatively Activated M $\phi$ | ARG1             | 1.5                  |            | -5.5                  |            | -1.1                |          | 1.1                   |          | -1.1                   |            |            |
|                                  | CH2A             | -1.0                 |            | 2.1                   |            | 1.6                 |          | 1.3                   |          | 1.1                    |            |            |
|                                  | CLEC10A (MGL)    | -1.2                 |            | -4.5                  |            | -3.0                |          | 1.2                   |          | -1.7                   |            |            |
|                                  | MBNL1            | 2.4                  |            | -1.1                  |            | 1.7                 |          | 2.0                   |          | 1.6                    |            |            |
|                                  | RETI8 (PZZ1)     | -1.8                 |            | 1.4                   |            | -1.6                |          | -2.6                  |          | 1.1                    |            |            |
|                                  | TTEC             | -1.3                 |            | 1.1                   |            | -1.7                |          | -1.3                  |          | -2.1                   |            |            |
| Chemokines                       |                  |                      |            |                       |            |                     |          |                       |          |                        |            |            |
|                                  | CCL Chemokines   | CCL2 (MCP1)          | 1.2        |                       | 2.7        |                     | 2.0      |                       | 1.7      |                        | -1.2       |            |
|                                  |                  | CCL3 (MIP1A)         | -1.6       |                       | -1.2       |                     | -1.6     |                       | 1.1      |                        | -1.6       |            |
|                                  |                  | CCL4 (MIP1B)         | -1.4       |                       | 1.0        |                     | -1.7     |                       | 1.3      |                        | -1.6       |            |
|                                  |                  | CCL5 (RANTES)        | -1.2       |                       | 1.4        |                     | -1.1     |                       | -1.6     |                        | -2.2       |            |
|                                  |                  | CCL8 (MCP2)          | -1.4       |                       | -1.5       |                     | -1.8     |                       | -1.1     |                        | -2.1       | $p = 0.07$ |
|                                  |                  | CCL11 (EOT1)         | 3.0        |                       | 3.0        |                     | 4.3      |                       | 11.3     | $p < 0.01$             | 3.9        |            |
|                                  |                  | CCL16 (LEC)          | -1.3       |                       | -8.0       | $p < 0.05$          | -1.8     |                       | -1.4     |                        | -1.6       |            |
|                                  |                  | CCL17 (TARC)         | -1.6       |                       | 1.3        |                     | 5.6      | $p = 0.06$            | 1.9      |                        | 1.1        |            |
|                                  |                  | CCL19 (MIP3B)        | -1.5       |                       | -1.0       |                     | -1.1     |                       | -1.2     |                        | -1.1       |            |
|                                  |                  | CCL20 (MIP1A)        | 2.1        |                       | 3.1        | $p < 0.01$          | 1.5      |                       | 2.9      | $p < 0.05$             | 3.1        | $p < 0.01$ |
|                                  |                  | CCL21 (SLC)          | -1.8       |                       | -1.8       |                     | -1.8     |                       | 1.1      |                        | -1.3       |            |
|                                  |                  | CCL22 (MIP1C)        | -2.0       |                       | 3.8        | $p < 0.05$          | 1.4      |                       | 1.8      |                        | -1.7       |            |
|                                  |                  | CCL23 (MIP1-1)       | 1.2        |                       | 1.6        |                     | 1.4      |                       | -1.1     |                        | -1.2       |            |
|                                  |                  | CCL24 (EOT2)         | -1.1       |                       | -2.5       |                     | -2.3     |                       | 1.9      |                        | -1.1       |            |
|                                  |                  | CCL25 (TECK)         | 1.0        |                       | 1.0        |                     | -1.9     | $p < 0.05$            | 1.6      |                        | -1.1       |            |
|                                  |                  | CCL26 (EOT3)         | 2.7        |                       | 3.7        |                     | 16.6     | $p = 0.06$            | 15.1     | $p < 0.05$             | 9.3        | $p = 0.08$ |
|                                  |                  | CCL27 (CTACK)        | 1.3        |                       | 1.0        |                     | -1.4     |                       | 1.3      |                        | 1.2        |            |
|                                  |                  | CCL29 (MCC)          | -1.9       |                       | -8.3       | $p < 0.05$          | -1.4     |                       | -1.5     |                        | -1.5       |            |
|                                  |                  | CXCL                 |            |                       |            |                     |          |                       |          |                        |            |            |
| CXCL                             |                  |                      | CXCL2      | -1.2                  |            | 4.0                 |          | 1.3                   |          | 1.4                    |            | -1.6       |
|                                  | PF4 (CXCL4)      |                      | 3.6        |                       | 5.5        |                     | 13.2     | $p = 0.07$            | 2.9      |                        | 2.5        |            |
|                                  | CXCL5            |                      | -1.1       |                       | 3.2        |                     | 2.1      |                       | 2.0      |                        | 2.4        |            |
|                                  | PPBP (CXCL7)     |                      | 1.2        |                       | 2.5        |                     | 1.7      |                       | 1.1      |                        | 1.4        |            |
|                                  | IL8 (CXCL8)      |                      | -1.5       |                       | 1.5        |                     | -1.3     |                       | -1.5     |                        | -1.4       |            |
|                                  | CXCL9 (MIP3)     |                      | -1.8       |                       | 3.0        |                     | 3.2      |                       | 1.0      |                        | -1.4       |            |
|                                  | CXCL10 (IP10)    |                      | -1.6       |                       | 1.3        |                     | 1.4      |                       | -1.4     |                        | -1.9       |            |
|                                  | CXCL11 (ITAC)    |                      | -1.2       |                       | -1.5       |                     | 1.3      |                       | -1.3     |                        | 1.1        |            |
|                                  | CXCL12 (SDF1)    |                      | -1.1       |                       | -1.2       |                     | -1.4     |                       | -1.1     |                        | -1.7       |            |
|                                  | CXCL14 (BranX)   |                      | -2.5       | $p = 0.06$            | 1.2        |                     | -1.3     |                       | -1.1     |                        | -1.4       |            |
|                                  | CXCL16 (SRPSPDN) | 1.2                  |            | -1.1                  |            | 1.1                 |          | 1.0                   |          | -1.0                   |            |            |
| XCL                              |                  |                      |            |                       |            |                     |          |                       |          |                        |            |            |
|                                  | XCL1             | -2.7                 |            | -1.3                  |            | -2.4                |          | -1.9                  |          | -2.5                   |            |            |
| Chemokine Receptors              |                  |                      |            |                       |            |                     |          |                       |          |                        |            |            |
|                                  | CCR1             | -1.1                 |            | 4.7                   | $p < 0.01$ | -1.5                |          | 1.0                   |          | -2.2                   |            |            |
| CCR                              | CCR2             | -2.5                 | $p < 0.05$ | 1.3                   |            | -1.3                |          | -1.2                  |          | -2.8                   | $p < 0.05$ |            |

|                                  |                 |                   |          |                    |            |                  |            |                    |            |                     |          |
|----------------------------------|-----------------|-------------------|----------|--------------------|------------|------------------|------------|--------------------|------------|---------------------|----------|
|                                  | CCR3            | 1.3               |          | 2.2                |            | 9.7              | p < 0.005  | 3.2                | p < 0.05   | 2.8                 | p = 0.07 |
|                                  | CCR4            | 1.3               |          | 2.8                | p < 0.01   | 1.5              |            | 1.3                |            | -1.3                |          |
|                                  | CCR5            | -2.1              |          | 1.3                |            | -2.4             |            | -2.2               |            | -3.3                | p < 0.05 |
| Table 45 Liver 14 DAi vs Control |                 | 100 ug/kg Control |          | 1000 ug/kg Control |            | Control Infected |            | 100 ug/kg Infected |            | 1000 ug/kg Infected |          |
|                                  | Gene            | Fold              | $\alpha$ | Fold               | $\alpha$   | Fold             | $\alpha$   | Fold               | $\alpha$   | Fold                | $\alpha$ |
| CCR                              | CCR7            | 1.3               |          | 4.8                | p = 0.06   | -1.1             |            | 1.3                |            | -1.5                |          |
|                                  | CCR8            | 1.0               |          | -1.2               |            | 1.5              |            | 2.2                |            | -1.0                |          |
|                                  | CCR10           | -2.9              |          | -1.3               |            | -2.8             |            | -3.3               |            | -2.4                |          |
| CXCR                             | BLR1 (CXCR1)    | 3.3               | p < 0.05 | 4.3                | p < 0.005  | 1.3              |            | 2.6                | p < 0.05   | -1.1                |          |
|                                  | BLR2 (CXCR2)    | 1.8               | p < 0.01 | 2.5                | p < 0.0005 | -1.3             |            | 1.7                | p < 0.05   | -1.6                | p < 0.05 |
|                                  | CXCR3           | -1.5              |          | 3.4                | p < 0.05   | -1.5             |            | 1.1                |            | -1.9                |          |
|                                  | CXCR4           | -2.1              |          | -1.0               |            | -1.6             |            | -1.4               |            | -2.4                |          |
|                                  | BLR1 (CXCR5)    | -4.2              |          | -1.0               |            | -3.5             |            | -2.7               |            | -2.3                |          |
|                                  | CXCR6           | -1.1              |          | 1.3                |            | -2.2             | p < 0.05   | -1.0               |            | -2.0                |          |
|                                  | CXCR61 (CXCR7)  | -1.6              |          | -1.4               |            | -2.0             |            | -1.3               |            | -1.2                | p < 0.05 |
| XCR                              | BCR1            | -1.1              |          | -1.4               |            | -2.4             |            | -1.4               |            | -2.8                |          |
| CX3CR                            | CX3CR           | 1.1               |          | -1.6               |            | -1.6             |            | -1.1               |            | -1.3                |          |
| Chitinase and FIZZ Family        | CHI1            | 1.8               |          | 2.0                |            | 2.7              |            | 1.1                |            | 1.0                 |          |
|                                  | CHI3L1 (YKL40)  | -2.6              |          | -1.1               |            | -2.1             |            | -1.4               |            | -1.3                |          |
|                                  | CHI3L2 (YKL39)  | -1.4              |          | 1.8                |            | -1.2             |            | -1.7               |            | -2.6                |          |
| CTL/NK Cell Associated           | CD8A            | 1.4               |          | 1.8                |            | 1.4              |            | 1.9                |            | -1.2                |          |
|                                  | CD8B            | -1.1              |          | 1.3                |            | 1.1              |            | 1.5                |            | -1.5                |          |
|                                  | FCGR3B (CD16)   | 1.0               |          | 1.9                | p = 0.6    | -1.2             |            | -1.0               |            | -1.9                | p = 0.06 |
|                                  | KLRB1 (NKR-PTA) | 1.1               |          | 1.2                |            | 1.4              |            | 1.3                |            | -1.0                |          |
|                                  | PRF1            | 1.3               |          | 2.1                |            | -1.1             |            | 1.4                |            | 1.5                 |          |
| Eosinophil Associated            | EPX             | 1.9               |          | 6.5                | p = 0.08   | 30.4             | p < 0.0005 | 25.5               | p < 0.0001 | 4.5                 | p = 0.08 |
| Immunoglobulin Associated        | IGHA1           | -1.4              |          | 2.3                |            | 1.2              |            | 2.0                |            | -1.7                |          |
|                                  | IGHG            | -2.3              | p < 0.05 | -1.8               |            | -1.1             |            | 1.4                |            | 1.7                 |          |
|                                  | IGHG1           | -3.2              |          | 2.2                |            | 3.2              |            | 1.7                |            | -1.3                |          |
|                                  | IGHG2A          | 1.2               |          | 69.0               | p < 0.05   | 6.0              |            | 3.2                |            | 11.6                |          |
|                                  | IGHG2B          | 1.0               |          | 3.2                |            | 32.0             | p < 0.001  | 5.3                |            | 3.4                 |          |
|                                  | IGHG3           | -2.0              |          | 4.8                |            | 3.5              |            | 1.7                |            | -5.9                |          |
|                                  | IGHG4           | -1.1              |          | 10.9               | p < 0.05   | 8.4              | p < 0.05   | 3.0                |            | 2.5                 |          |
|                                  | IGJ             | 1.3               |          | 9.5                | p < 0.05   | 1.5              |            | 1.6                |            | 1.0                 |          |
|                                  | IGHM            | 1.5               |          | 10.6               | p < 0.05   | -1.3             |            | 1.8                |            | -1.2                |          |



|                                  |                  |                   |           |                    |           |                  |          |                    |          |                     |          |
|----------------------------------|------------------|-------------------|-----------|--------------------|-----------|------------------|----------|--------------------|----------|---------------------|----------|
| T Cell Expressed                 | TNFSF4 (OX40L)   | -1.1              |           | -1.2               |           | -1.1             |          | -1.4               |          | -1.8                | p < 0.05 |
|                                  | VTCN1 (B7H4)     | 1.3               |           | -1.5               |           | -2.5             |          | 1.1                |          | 1.1                 |          |
| Th1-Associated Cytokines         | CD40LG           | -1.2              |           | 4.3                | p < 0.05  | 1.1              |          | 1.1                |          | -2.0                |          |
|                                  | CTLA4            | -1.1              |           | 1.0                |           | -2.0             | p < 0.05 | -1.1               |          | -1.9                | p < 0.05 |
|                                  | ICOS             | 1.3               |           | 3.8                |           | 2.0              |          | -1.2               |          | -1.3                |          |
|                                  | TCRA             | 1.6               |           | 2.0                | p < 0.05  | 1.1              |          | 1.5                |          | -1.1                |          |
|                                  | TNFSF4 (OX40)    | 1.1               |           | 5.7                |           | 1.3              |          | -1.3               |          | 1.5                 |          |
|                                  | EBB3 (IL27)      | -1.2              |           | 1.8                |           | -2.1             |          | -1.3               |          | -3.0                | p < 0.05 |
|                                  | IFNG             | -1.8              |           | -1.5               |           | 1.2              |          | 1.4                |          | 1.4                 |          |
|                                  | IL12A            | -1.3              |           | 1.9                |           | 1.2              |          | 1.1                |          | 1.0                 |          |
|                                  | IL12B            | -1.9              |           | 1.8                |           | 2.8              |          | -1.6               |          | -2.0                |          |
|                                  | IL18             | 1.5               |           | 2.0                |           | 2.0              |          | 1.9                |          | 1.2                 |          |
| Table 4S Liver 14 DAI vs Control |                  |                   |           |                    |           |                  |          |                    |          |                     |          |
|                                  |                  |                   |           |                    |           |                  |          |                    |          |                     |          |
| Surface Receptors                | Gene             |                   |           |                    |           |                  |          |                    |          |                     |          |
|                                  |                  | 100 us/kg Control |           | 1000 us/kg Control |           | Control Infected |          | 100 us/kg Infected |          | 1000 us/kg Infected |          |
|                                  |                  | Fold              | p         | Fold               | p         | Fold             | p        | Fold               | p        | Fold                | p        |
|                                  | IL18RA           | 1.3               |           | 2.9                | p < 0.05  | -1.5             |          | 1.0                |          | -1.5                |          |
|                                  | HAVCR2 (TIM-3)   | 3.4               | p < 0.005 | 3.9                | p < 0.005 | 1.7              |          | 2.3                | p < 0.05 | 1.2                 |          |
| SOCS/PAS                         | SOCS1            | 1.4               |           | 1.3                |           | -1.7             |          | -1.4               |          | -1.3                |          |
|                                  | SOCS2            | 2.5               |           | 3.7                | p = 0.06  | -1.8             |          | -1.1               |          | -2.0                |          |
|                                  | SOCS5            | -1.8              | p < 0.05  | -1.2               |           | -1.1             |          | 1.1                |          | -1.8                | p < 0.05 |
|                                  | PAS4             | -1.0              |           | -1.0               |           | -1.9             |          | 1.1                |          | -1.9                |          |
| Intracellular Signaling          | ITK              | 1.5               |           | 2.9                | p < 0.005 | 1.8              |          | 2.0                | p < 0.05 | -1.5                |          |
|                                  | ITK              | 1.6               |           | 2.0                |           | -1.1             |          | 1.8                |          | -1.1                |          |
| Transcription Factors            | HLX1             | -1.0              |           | 1.4                |           | 1.4              |          | 1.8                |          | 1.1                 |          |
|                                  | BP1              | 1.9               | p = 0.08  | 2.1                | p < 0.05  | -1.1             |          | -1.6               |          | -1.4                |          |
|                                  | BUNX1            | 1.1               |           | 1.2                |           | 1.4              |          | 1.1                |          | -1.6                |          |
|                                  | STAT1            | 1.8               |           | 1.7                |           | 1.6              |          | 1.2                |          | -1.0                |          |
|                                  | STAT4            | 1.4               |           | 2.5                |           | 1.4              |          | 1.3                |          | -1.1                |          |
|                                  | TBX21            | 1.4               |           | 3.5                | p = 0.08  | -1.7             |          | 1.0                |          | -1.1                |          |
|                                  |                  |                   |           |                    |           |                  |          |                    |          |                     |          |
| Th2-Associated Cytokines         | CT19arf10 (IL25) | -1.2              |           | 1.1                |           | -1.0             |          | 1.2                |          | -1.7                |          |
|                                  | IL4              | -1.8              |           | 1.0                |           | 2.1              |          | -1.0               |          | -1.1                |          |
|                                  | IL5              | -1.0              |           | 1.1                |           | -1.1             |          | -1.1               |          | 1.1                 |          |
|                                  | IL9              | -1.1              |           | 1.7                |           | -1.4             |          | 1.1                |          | 1.5                 |          |
|                                  | IL13             | -1.1              |           | -1.5               |           | 3.0              |          | 1.7                |          | 1.3                 |          |
|                                  | IL17E            | -1.9              |           | 2.4                | p = 0.06  | 1.7              |          | 1.4                |          | 1.8                 |          |
|                                  | TIMED1 (ST2L)    | -1.1              |           | 1.0                |           | -2.0             | p < 0.05 | -1.1               |          | -1.9                | p < 0.05 |
|                                  | TSLP             | -1.4              |           | -4.8               | p < 0.005 | 1.7              |          | -1.1               |          | -1.3                |          |

|                                         |                 |                      |          |                       |          |                     |           |                       |          |                        |           |
|-----------------------------------------|-----------------|----------------------|----------|-----------------------|----------|---------------------|-----------|-----------------------|----------|------------------------|-----------|
| Cytokine Receptors                      | IL4R            | 1.2                  |          | 1.5                   |          | -1.3                |           | 3.5                   | p < 0.01 | 1.0                    |           |
|                                         | IL13RA1         | 1.2                  |          | -1.3                  |          | -1.2                |           | 1.2                   |          | -1.6                   |           |
|                                         | IL13RA2         | 1.4                  |          | 1.1                   |          | 1.4                 |           | -1.3                  |          | 1.1                    |           |
|                                         | IL5R            | 2.4                  |          | 3.8                   | p < 0.05 | 9.7                 | p < 0.005 | 6.0                   | p < 0.01 | 2.5                    |           |
|                                         |                 |                      |          |                       |          |                     |           |                       |          |                        |           |
| Miscellaneous                           | DEF6 (SLAT)     | -1.3                 |          | 1.2                   |          | -1.3                |           | 1.7                   |          | -1.3                   |           |
|                                         | NEATC2P (NP45)  | -1.2                 |          | 1.5                   |          | -1.2                |           | -1.0                  |          | -2.0                   |           |
| SOCS/PIAS                               | PIAS1           | 1.2                  |          | 1.1                   |          | -1.1                |           | -1.1                  |          | -1.3                   |           |
|                                         | PIAS2           | 1.1                  |          | 1.2                   |          | -1.1                |           | -1.1                  |          | -1.6                   | p < 0.05  |
|                                         | PIAS3           | -1.2                 |          | -1.4                  |          | -2.1                | p < 0.05  | -1.3                  |          | -2.8                   | p < 0.005 |
|                                         | SOCS3           | 3.3                  | p < 0.01 | 3.2                   | p < 0.01 | 1.0                 |           | 1.6                   |          | 1.0                    |           |
|                                         | SOCS7           | -1.5                 | p < 0.05 | 1.3                   |          | -1.5                |           | 1.2                   |          | -2.3                   | p < 0.001 |
| Surface Receptors                       | GP844 (CRTH2)   | -2.0                 |          | -1.2                  |          | -2.2                |           | -1.4                  |          | -1.0                   |           |
| Table 4S Liver 14 DAI vs Control        |                 |                      |          |                       |          |                     |           |                       |          |                        |           |
| Th2-Associated<br>Transcription Factors | Gene            | 100 ug/kg<br>Control |          | 1000 ug/kg<br>Control |          | Control<br>Infected |           | 100 ug/kg<br>Infected |          | 1000 ug/kg<br>Infected |           |
|                                         |                 | Fold                 | $\alpha$ | Fold                  | $\alpha$ | Fold                | $\alpha$  | Fold                  | $\alpha$ | Fold                   | $\alpha$  |
|                                         | BCL6            | -1.1                 |          | 1.2                   |          | -1.1                |           | 1.1                   |          | -1.6                   |           |
|                                         | ETS1            | 1.1                  |          | 1.6                   |          | -1.8                |           | -1.2                  |          | -1.7                   |           |
|                                         | ETS2            | 1.9                  |          | 1.5                   |          | -1.4                |           | 1.6                   |          | -1.5                   |           |
|                                         | GATA3           | 1.3                  |          | 1.8                   |          | 1.1                 |           | 1.2                   |          | -1.2                   |           |
|                                         | MAF             | -1.3                 |          | 1.2                   |          | 1.1                 |           | 1.3                   |          | 1.0                    |           |
|                                         | STAT6           | 1.0                  |          | 1.1                   |          | -2.8                | p < 0.05  | 1.2                   |          | -1.7                   |           |
| Treg Associated                         | IL2BA (CD25)    | 1.2                  |          | 4.1                   | p < 0.05 | -1.1                |           | -1.1                  |          | -1.4                   |           |
|                                         | FDPX3           | 1.1                  |          | 2.7                   | p = 0.07 | -1.5                |           | 1.6                   |          | -1.0                   |           |
|                                         | IL10            | 2.0                  |          | 3.7                   |          | -1.3                |           | 1.2                   |          | -1.9                   |           |
|                                         | IGFB1           | -1.0                 |          | 2.3                   | p < 0.05 | -1.1                |           | 1.5                   |          | -1.6                   |           |
|                                         | TNFRSF18 (GITR) | -1.6                 |          | 6.2                   |          | 1.2                 |           | 1.3                   |          | -3.4                   |           |
| VA Regulated                            | CD38            | 1.2                  |          | 2.3                   |          | -1.1                |           | -1.1                  |          | -1.7                   |           |
|                                         | CYP26A          | -1.6                 |          | -6.3                  | p < 0.05 | -3.0                |           | -1.5                  |          | -4.1                   | p < 0.05  |
|                                         | Ba17            | 1.4                  |          | 1.6                   |          | -1.5                |           | -1.1                  |          | -1.4                   |           |

Table 4S Liver 14 DAJ vs Infected

|                                  | Gene           | 100 ug/kg<br>Infected |                 | 1000 ug/kg<br>Infected |          | Liver Day 14 versus<br>Non-Infected ATRA Control | 100 ug/kg<br>Infected |            | 1000 ug/kg<br>Infected |             |            |
|----------------------------------|----------------|-----------------------|-----------------|------------------------|----------|--------------------------------------------------|-----------------------|------------|------------------------|-------------|------------|
|                                  |                | Fold                  | $\alpha$        | Fold                   | $\alpha$ |                                                  | Fold                  | $\alpha$   | Fold                   | $\alpha$    |            |
| Alternatively Activated M $\phi$ | ARG1           | 1.1                   |                 | 1.0                    |          |                                                  | 1.4                   |            | 5.0                    |             |            |
|                                  | CD8A           | -1.2                  |                 | -1.5                   |          |                                                  | 1.4                   |            | -1.9                   |             |            |
|                                  | CLEC10A (MGL)  | 3.4                   |                 | 1.7                    |          |                                                  | -1.0                  |            | 2.6                    |             |            |
|                                  | MBNL1          | 1.2                   |                 | -1.1                   |          |                                                  | -1.4                  |            | 1.7                    |             |            |
|                                  | BSTB (FIZZ1)   | -1.6                  |                 | 1.8                    |          |                                                  | -1.4                  |            | -1.2                   |             |            |
|                                  | TFEC           | 1.3                   |                 | -1.2                   |          |                                                  | 1.0                   |            | -2.3                   |             |            |
|                                  |                |                       |                 |                        |          |                                                  |                       |            |                        |             |            |
| Chemokines                       | CCL Chemokines | CCL2 (MCP1)           | -1.1            |                        | -2.4     |                                                  |                       | 1.4        |                        | -3.2        | $p = 0.07$ |
|                                  |                | CCL3 (MIP1 $\alpha$ ) | 1.8             |                        | 1.0      |                                                  | 1.7                   |            | -2.0                   |             |            |
|                                  |                | CCL4 (MIP1B)          | 1.3             |                        | 1.0      |                                                  | 1.1                   |            | -1.7                   |             |            |
|                                  |                | CCL5 (RANTES)         | -1.4            |                        | -2.0     |                                                  | -1.3                  |            | -3.1                   | $p < 0.05$  |            |
|                                  |                | CCL8 (MCP2)           | 1.7             |                        | -1.1     |                                                  | 1.3                   |            | -2.0                   | $p < 0.05$  |            |
|                                  |                | CCL11 (EOT)           | 2.4             |                        | -1.3     |                                                  | 3.3                   |            | -1.7                   |             |            |
|                                  |                | CCL16 (LEC)           | 1.2             |                        | 1.1      |                                                  | -1.1                  |            | 4.9                    |             |            |
|                                  |                | CCL17 (TARC)          | -2.8            |                        | -4.9     |                                                  | 3.2                   |            | -1.1                   |             |            |
|                                  |                | CCL19 (MIP3B)         | -1.1            |                        | 1.0      |                                                  | 1.3                   |            | -1.1                   |             |            |
|                                  |                | CCL20 (MIP3A)         | -2.0            |                        | 2.1      |                                                  | 1.4                   |            | -1.0                   |             |            |
|                                  |                | CCL21 (SLC)           | 2.0             |                        | 1.4      |                                                  | 2.0                   |            | 1.4                    |             |            |
|                                  |                | CCL22 (MDC)           | 1.2             |                        | -3.0     |                                                  | 3.5                   | $p = 0.06$ | -7.8                   | $p < 0.01$  |            |
|                                  |                | CCL23 (MIP-1)         | -1.6            |                        | -1.7     |                                                  | -1.3                  |            | -2.0                   |             |            |
|                                  |                | CCL24 (EOT2)          | 4.3             |                        | 2.0      |                                                  | 2.1                   |            | -1.1                   |             |            |
|                                  |                | CCL25 (TECK)          | 3.1             | $p < 0.005$            | 1.7      |                                                  | 1.6                   | $p = 0.08$ | -1.1                   |             |            |
|                                  |                | CCL26 (EOT3)          | -1.1            |                        | -1.8     |                                                  | 5.8                   |            | -1.4                   |             |            |
|                                  |                | CCL27 (CTACK)         | 1.8             |                        | 1.7      |                                                  | -1.0                  |            | 1.2                    |             |            |
|                                  |                | CCL28 (HEC)           | -1.1            |                        | -1.0     |                                                  | 1.2                   |            | 5.5                    |             |            |
|                                  |                |                       |                 |                        |          |                                                  |                       |            |                        |             |            |
|                                  |                | CXCL                  | CXCL Chemokines | CXCL2                  | -1.2     |                                                  | -2.5                  |            |                        | -1.1        |            |
| PF4 (CXCL4)                      | -4.5           |                       |                 |                        | -5.3     |                                                  | -1.2                  |            | -2.2                   |             |            |
| CXCL5                            | -2.4           |                       |                 |                        | 1.1      |                                                  | 1.4                   |            | -1.3                   |             |            |
| PPBP (CXCL7)                     | -1.5           |                       |                 |                        | -1.2     |                                                  | -1.1                  |            | -1.8                   |             |            |
| IL8 (CXCL8)                      | -1.2           |                       |                 |                        | -1.1     |                                                  | 1.0                   |            | -2.2                   | $p < 0.05$  |            |
| CXCL9 (MIP)                      | -3.2           |                       |                 |                        | -4.4     |                                                  | 1.8                   |            | -4.2                   |             |            |
| CXCL10 (IP10)                    | -2.8           |                       |                 |                        | -2.7     |                                                  | -1.2                  |            | -2.4                   |             |            |
| CXCL11 (ITAC)                    | -1.7           |                       |                 |                        | -1.2     |                                                  | -1.1                  |            | 1.7                    |             |            |
| CXCL12 (SDF1)                    | 1.2            |                       |                 |                        | -1.3     |                                                  | -1.0                  |            | -1.4                   |             |            |
| CXCL14 (BRAF)                    | 1.2            |                       |                 |                        | -1.0     |                                                  | 2.4                   |            | -1.7                   |             |            |
| CXCL16 (SR-PSOX)                 | -1.1           |                       |                 |                        | -1.1     |                                                  | -1.2                  |            | 1.0                    |             |            |
|                                  |                |                       |                 |                        |          |                                                  |                       |            |                        |             |            |
| XCL                              | XCL1           |                       |                 | 1.2                    |          | -1.1                                             |                       |            | 1.4                    |             | -1.9       |
| Chemokine Receptors              | CCR1           | 1.4                   |                 | -1.5                   |          |                                                  | 1.0                   |            | -10.6                  | $p < 0.001$ |            |
|                                  | CCR2           | 1.0                   |                 | -2.3                   |          |                                                  | 2.0                   |            | -3.6                   | $p < 0.05$  |            |



|                      |                   |      |  |      |          |
|----------------------|-------------------|------|--|------|----------|
| Inflammation         | IL1A              | 1.1  |  | -1.8 |          |
|                      | IL1B              | -2.4 |  | -3.9 | p = 0.07 |
|                      | IL6               | 1.3  |  | -3.2 |          |
|                      | NOS2              | 1.7  |  | 1.2  |          |
|                      | TNF               | 2.2  |  | -1.3 |          |
| Mast Cell Associated | CMA1              | 2.1  |  | 1.2  |          |
|                      | FCER1A            | -1.4 |  | -1.3 |          |
|                      | HDC               | -1.2 |  | -2.3 |          |
|                      | KIT               | -1.5 |  | -3.4 | p < 0.05 |
|                      | TPSAB1 (MC trypt) | 2.9  |  | 1.0  |          |

|     |           |      |          |
|-----|-----------|------|----------|
| 1.4 |           | -2.6 |          |
| 1.2 |           | -2.6 |          |
| 2.0 |           | -4.0 | p < 0.05 |
| 1.3 |           | -1.9 |          |
| 1.0 |           | -8.8 | p < 0.01 |
| 2.0 |           | -1.1 |          |
| 2.1 | p < 0.05  | 2.1  | p < 0.05 |
| 3.4 |           | 5.4  | p < 0.05 |
| 1.7 |           | -2.7 | p < 0.05 |
| 9.4 | p < 0.001 | 4.7  | p < 0.05 |

Table 4S Liver 14 DAI vs Infected

Liver Day 14 versus  
Non-Infected ATRA Control

| Gene                      | 100 us/kg<br>Infected |          | 1000 us/kg<br>Infected |           |          |
|---------------------------|-----------------------|----------|------------------------|-----------|----------|
|                           | Fold                  | $\alpha$ | Fold                   | $\alpha$  |          |
| CD4                       | 1.9                   |          | -1.1                   |           |          |
| CD59                      | -1.5                  |          | -1.7                   |           |          |
| HMMT                      | -1.4                  |          | -1.6                   | p < 0.05  |          |
| IL2                       | -2.1                  |          | -5.0                   | p < 0.01  |          |
| INDC                      | -2.0                  |          | -2.2                   |           |          |
| ITGB1 (CD29)              | -1.1                  |          | -1.4                   |           |          |
| KITLG (SCP)               | -1.4                  |          | -2.0                   | p = 0.06  |          |
| LLRB4s1 (L13)             | -1.1                  |          | -2.1                   |           |          |
| LLRB4s2 (L13)             | -1.6                  |          | -9.6                   | p < 0.001 |          |
| MST1                      | 2.4                   |          | -1.2                   |           |          |
| MST1R (RON)               | 2.1                   |          | 1.8                    |           |          |
| PIGR                      | 1.3                   |          | 2.3                    |           |          |
| TNFSF18                   | 1.1                   |          | 1.1                    |           |          |
| Prostaglandin/Leukotriene | ALOX5                 | 1.2      |                        | -1.6      |          |
|                           | ALOXAP                | -1.7     |                        | -1.8      | p = 0.07 |
|                           | ALOX15                | 2.5      |                        | 2.5       |          |
|                           | CYS1TR1               | 1.6      |                        | -1.1      |          |
|                           | CYS1TR2               | -1.1     | p = 0.06               | -1.4      |          |
|                           | LTC4S                 | 1.8      |                        | 1.0       |          |
|                           | PTGS2 (COX2)          | 1.3      |                        | -1.3      |          |
| T Cell Costimulatory      | CD274 (B7-H1)         | -1.5     |                        | -6.2      |          |
| Accessory Cell Expressed  | CD276 (B7H3)          | 1.1      |                        | -2.1      | p = 0.06 |
|                           | CD80 (B7-1)           | -1.2     |                        | -2.0      |          |
|                           | CD86 (B7-2)           | 1.5      |                        | -1.7      |          |
|                           | PDCD1                 | -1.5     |                        | -1.2      |          |
|                           | PDCD1LG2 (B7-DC)      | -1.1     |                        | -2.5      |          |
|                           | CD40 (TNFRSF5)        | 1.2      |                        | -1.7      |          |
|                           | TNFSF8 (CD30L)        | 1.0      |                        | -1.3      |          |

| Gene | 100 us/kg<br>Infected |          | 1000 us/kg<br>Infected |            |
|------|-----------------------|----------|------------------------|------------|
|      | Fold                  | $\alpha$ | Fold                   | $\alpha$   |
| 1.0  |                       | -2.8     |                        | p < 0.05   |
| -1.6 |                       | -3.2     |                        | p < 0.05   |
| 1.2  |                       | 1.3      |                        |            |
| 1.8  |                       | -3.4     |                        | p < 0.05   |
| -3.1 |                       | -7.3     |                        | p = 0.06   |
| -1.0 |                       | -1.4     |                        | p = 0.06   |
| 1.7  |                       | -1.6     |                        |            |
| -2.9 |                       | 8.0      |                        | p < 0.001  |
| 1.2  |                       | 9.6      |                        | p < 0.0005 |
| 1.4  |                       | 1.0      |                        |            |
| 1.6  |                       | -1.4     |                        |            |
| 1.6  |                       | 2.6      |                        |            |
| -2.0 |                       | 1.1      |                        |            |

|      |  |      |  |           |
|------|--|------|--|-----------|
| 1.6  |  | -2.7 |  | p < 0.001 |
| 1.0  |  | -1.4 |  |           |
| 3.1  |  | -1.1 |  |           |
| 1.3  |  | -1.6 |  | p < 0.05  |
| -1.1 |  | -1.1 |  |           |
| 1.1  |  | 1.3  |  |           |
| 1.0  |  | -2.6 |  | p < 0.05  |

|      |  |      |  |            |
|------|--|------|--|------------|
| -1.2 |  | -9.4 |  | p < 0.05   |
| -1.3 |  | -4.8 |  | p < 0.0005 |
| -1.4 |  | -7.3 |  | p < 0.05   |
| 1.4  |  | -4.3 |  | p < 0.05   |
| 1.3  |  | -2.8 |  |            |
| -1.1 |  | -7.1 |  | p < 0.005  |
| 1.4  |  | -3.7 |  | p < 0.05   |
| -1.4 |  | -3.0 |  | p = 0.08   |



|                          |                                   |               |                    |                     |                    |                     |
|--------------------------|-----------------------------------|---------------|--------------------|---------------------|--------------------|---------------------|
| T Cell Expressed         | TNFSF4 (DX40L)                    | -1.3          | -1.7               | -1.3                | -1.5               |                     |
|                          | VTICN1 (B7H4)                     | 2.8           | 2.7                | -1.2                | 1.6                |                     |
|                          | CD40LG                            | 1.0           | -2.1               | 1.3                 | -8.4 p < 0.005     |                     |
|                          | CTLA4                             | 1.9           | 1.0                | 1.1                 | -2.0 p < 0.05      |                     |
|                          | ICOS                              | -2.4          | -2.6               | -1.6                | -4.9 p < 0.07      |                     |
|                          | ICRB                              | 1.4           | -1.1               | 1.0                 | -4.3 p < 0.05      |                     |
|                          | TNFSF4 (DX40)                     | -1.7          | 1.2                | -1.5                | -3.7               |                     |
| Th1-Associated Cytokines | EB3 (IL27)                        | 1.6           | -1.5               | -1.1                | -5.5 p < 0.001     |                     |
|                          | IFN $\gamma$                      | -1.7          | -1.7               | 1.3                 | -2.1               |                     |
|                          | IL12A                             | -1.1          | -1.1               | 1.3                 | -1.9               |                     |
|                          | IL12B                             | -4.4 p = 0.06 | -5.6 p < 0.05      | 1.2                 | -3.6 p = 0.06      |                     |
|                          | IL18                              | -1.0          | -1.6               | 1.3                 | -1.6               |                     |
|                          | IL22                              | -1.4          | -1.2               | 1.3                 | 1.6 p < 0.05       |                     |
|                          | IL23                              | 2.1           | 1.1                | -1.1                | -1.6               |                     |
|                          | Table 4S Liver 14 DAJ vs Infected | Gene          | 100 up/kq infected | 1000 up/kq infected | 100 up/kq infected | 1000 up/kq infected |
|                          |                                   |               | Fold               | $\alpha$            | Fold               | $\alpha$            |
| Surface Receptors        | IL18RA                            | 1.5           | -1.0               | -1.3                | -4.4 p < 0.05      |                     |
|                          | HAVCR2 (TM-3)                     | 1.4           | -1.5               | -1.4                | -3.3 p < 0.01      |                     |
| SOCS/PAS                 | SOCS1                             | 1.2           | 1.3                | -2.0 p = 0.06       | -1.7               |                     |
|                          | SOCS2                             | 1.7           | -1.1               | 2.8                 | 1.9                |                     |
|                          | SOCS5                             | 1.1           | -1.6               | 1.9 p < 0.05        | -1.5               |                     |
|                          | PAS4                              | 2.1 p = 0.06  | 1.0                | 1.2                 | -1.9               |                     |
| Intracellular Signaling  | ITK                               | 1.1           | -2.7 p < 0.05      | 1.4                 | -4.4 p < 0.0005    |                     |
|                          | TXK                               | 1.4           | -1.0               | -1.2                | -2.2               |                     |
| Transcription Factors    | ILX1                              | 2.7 p = 0.05  | 1.6                | 1.5                 | -1.1               |                     |
|                          | IRF1                              | 1.7           | -1.2               | -1.2                | -2.9 p < 0.05      |                     |
|                          | RUNX1                             | -1.3          | -2.2               | -1.0                | -1.7               |                     |
|                          | STAT1                             | -1.3          | -1.7               | -1.4                | -1.8               |                     |
|                          | STAT4                             | -1.1          | -1.6               | -1.1                | -2.8               |                     |
|                          | TBX21                             | 1.7           | 1.0                | -1.4                | -2.4               |                     |
| Th2-Associated Cytokines | C19orf10 (IL25)                   | 1.5           | -1.4               | 1.2                 | -1.4               |                     |
|                          | IL4                               | -2.1          | -1.9               | 1.8                 | 1.1                |                     |
|                          | IL5                               | 1.0           | 1.2                | -1.1                | 1.0                |                     |
|                          | IL9                               | 1.6           | 2.1                | 1.1                 | -1.2               |                     |
|                          | IL13                              | -1.8          | -2.3               | 1.8                 | 2.0                |                     |
|                          | IL17E                             | -1.1          | -2.1               | 1.1                 | 6.5                |                     |
|                          | TMED1 (ST2L)                      | -1.9 p = 0.05 | 1.0                | 1.1                 | -2.0 p < 0.05      |                     |
|                          | TSLP                              | -1.9          | -2.2               | 1.3                 | 3.6 p < 0.05       |                     |

|                                      |                  |                    |          |                     |          |
|--------------------------------------|------------------|--------------------|----------|---------------------|----------|
| Cytokine Receptors                   | IL4R             | 4.4                | p < 0.01 | 1.6                 |          |
|                                      | IL13RA1          | 1.4                |          | -1.4                |          |
|                                      | IL13RA2          | -1.9               |          | -1.3                |          |
|                                      | IL5R             | -1.6               |          | -3.9                | P = 0.06 |
| Miscellaneous                        | DEFA (SLAT)      | 2.1                | p = 0.08 | -1.0                |          |
|                                      | NFATC2IP (NIP45) | 1.2                |          | -1.6                |          |
| SOCS/PIAS                            | PIAS1            | -1.2               |          | -1.2                |          |
|                                      | PIAS2            | 1.0                |          | -1.4                |          |
|                                      | PIAS3            | 1.6                |          | -1.4                |          |
|                                      | SOCS3            | 1.6                |          | 1.0                 |          |
|                                      | SOCS7            | 1.9                | p < 0.05 | -1.5                | p = 0.07 |
| Surface Receptors                    | GPR44 (CRTH2)    | 1.6                |          | 2.1                 |          |
| Table 4S Liver 14 DAI vs Infected    |                  | 100 ug/kg Infected |          | 1000 ug/kg Infected |          |
|                                      | Gene             | Fold               | $\alpha$ | Fold                | $\alpha$ |
| Th2-Associated Transcription Factors | BCL6             | 1.1                |          | -1.4                |          |
|                                      | ETS1             | 1.4                |          | 1.0                 |          |
|                                      | ETS2             | 2.2                |          | -1.0                |          |
|                                      | GATA3            | 1.1                |          | -1.3                |          |
|                                      | MAF              | 1.1                |          | -1.1                |          |
|                                      | WTAT6            | 3.2                | p < 0.05 | 1.7                 |          |
| Treg Associated                      | CD25             | -1.0               |          | -1.3                |          |
|                                      | FoxP3            | -2.5               |          | 1.5                 |          |
|                                      | IL10             | 1.5                |          | -1.5                |          |
|                                      | TFR1             | 1.7                |          | -1.4                |          |
|                                      | TNFRSF18 (GITR)  | 1.1                |          | -4.0                |          |
| VA Regulated                         | CD38             | 1.0                |          | -1.5                |          |
|                                      | CYP26A           | 2.1                |          | -1.5                |          |
|                                      | BAN17            | 1.4                |          | 1.1                 |          |

Liver Day 14 versus  
Non-infected ATRA Control

|                    |           |                     |            |
|--------------------|-----------|---------------------|------------|
| 3.0                | p < 0.05  | -1.2                |            |
| 1.0                |           | -1.2                |            |
| -1.9               |           | 2.5                 |            |
| 2.5                |           | -1.5                |            |
| 2.1                | p = 0.06  | -1.6                |            |
| 1.5                |           | -2.9                | p < 0.05   |
| -1.2               |           | -1.5                | p = 0.07   |
| 1.1                |           | -1.9                | p < 0.01   |
| -1.1               |           | -2.2                | p < 0.05   |
| -2.0               |           | -3.1                | p < 0.05   |
| 1.9                | p < 0.001 | -3.0                | p < 0.0001 |
| 1.5                |           | 1.2                 |            |
| 100 ug/kg Infected |           | 1000 ug/kg Infected |            |
| Fold               | $\alpha$  | Fold                | $\alpha$   |
| 1.2                |           | -1.9                |            |
| -1.4               |           | -2.8                | p < 0.05   |
| -1.2               |           | -2.1                |            |
| -1.9               |           | -2.2                |            |
| 1.7                |           | -1.2                |            |
| 1.1                |           | -1.9                |            |
| -1.3               |           | -5.7                | p < 0.05   |
| 1.4                |           | -2.8                |            |
| -1.7               |           | -7.0                | p < 0.05   |
| 1.5                |           | -3.6                | p < 0.01   |
| 2.0                |           | -21.1               | p < 0.05   |
| -1.4               |           | -2.1                |            |
| 1.1                |           | 1.4                 |            |
| -1.4               |           | -2.2                | p = 0.05   |
