# Supplementary material
Source: PubMed Central journal article supplement (PMC2687331)
Supplement: supp_77_6_2576__5.pdf [file supp_77_6_2576__5.pdf]

Table S5 Lung 7 DAI vs Control

| Gene                       | 100 ug/kg<br>Control |          | 1000 ug/kg<br>Control |          | Control<br>Infected |           | 100 ug/kg<br>Infected |            | 1000 ug/kg<br>Infected |            |
|----------------------------|----------------------|----------|-----------------------|----------|---------------------|-----------|-----------------------|------------|------------------------|------------|
|                            | Fold                 | n        | Fold                  | n        | Fold                | n         | Fold                  | n          | Fold                   | n          |
| Alternatively Activated Mφ |                      |          |                       |          |                     |           |                       |            |                        |            |
| ARG1                       | 1.3                  |          | 1.6                   |          | -1.1                |           | 1.8                   | p < 0.05   | -1.0                   |            |
| CD8A                       | -1.3                 |          | 1.6                   |          | -1.4                |           | -2.9                  | p < 0.05   | -1.2                   |            |
| Chemokines                 |                      |          |                       |          |                     |           |                       |            |                        |            |
| CCL11 (EOTF)               | 2.8                  |          | 4.0                   |          | 4.7                 | p < 0.01  | 53.2                  | p < 0.01   | 40.3                   | p < 0.05   |
| CCL24 (EOTF)               | 1.3                  |          | 2.0                   |          | -1.1                |           | 1.0                   |            | -1.4                   |            |
| CCL28 (EOTF)               | 1.7                  |          | 1.7                   |          | 3.5                 | p < 0.05  | 31.6                  | p < 0.005  | 3.5                    |            |
| Chemokine Receptors        |                      |          |                       |          |                     |           |                       |            |                        |            |
| CCR3                       | -3.6                 |          | -3.2                  |          | -3.0                |           | -3.2                  |            | 1.4                    |            |
| CCR4                       | -1.1                 |          | -1.3                  |          | -1.0                |           | -1.0                  |            | -1.0                   |            |
| CCR7                       | 1.4                  |          | -0.0                  |          | 1.2                 |           | -1.2                  |            | -1.2                   |            |
| CCR                        |                      |          |                       |          |                     |           |                       |            |                        |            |
| CCR1                       | 1.3                  |          | 1.7                   |          | -1.2                |           | 1.1                   |            | 1.1                    |            |
| CCR2                       | 1.4                  |          | 1.2                   |          | -2.0                |           | 1.0                   |            | -1.6                   |            |
| Endothelial Associated     |                      |          |                       |          |                     |           |                       |            |                        |            |
| EPX                        | -1.8                 |          | -2.2                  |          | 2.3                 |           | 1.4                   |            | -1.2                   |            |
| Immunoglobulin Associated  |                      |          |                       |          |                     |           |                       |            |                        |            |
| IGHA1                      | 1.1                  |          | -1.1                  |          | 1.6                 |           | 2.0                   | p < 0.005  | 1.1                    |            |
| IGHF                       | 1.7                  |          | 1.7                   |          | 2.0                 |           | -1.0                  |            | 2.8                    |            |
| IGM1                       | -3.0                 | p < 0.05 | -2.8                  | p < 0.05 | -2.8                | p < 0.05  | -3.7                  | p < 0.05   | -2.9                   | p < 0.05   |
| IGHA2A                     | -2.3                 |          | 2.1                   |          | 4.7                 |           | -1.4                  |            | 5.5                    |            |
| IGHG2B                     | 1.9                  | p < 0.05 | 1.2                   |          | 3.1                 | p < 0.005 | 2.8                   | p < 0.005  | 3.8                    | p < 0.0005 |
| IGM3                       | -2.4                 |          | -3.8                  |          | -6.7                |           | -4.3                  |            | -347.3                 | p < 0.005  |
| IGHG4                      | -2.6                 |          | 1.3                   |          | 1.3                 |           | -2.6                  |            | 1.3                    |            |
| IJJ                        | 2.1                  |          | 2.0                   |          | 3.0                 | p < 0.05  | 5.2                   | p < 0.005  | 1.6                    |            |
| IGM5                       | 1.4                  |          | 1.3                   |          | 1.2                 |           | -1.2                  |            | -1.3                   |            |
| Inflammation               |                      |          |                       |          |                     |           |                       |            |                        |            |
| IL1B                       | 1.3                  |          | 1.4                   |          | -1.3                |           | 3.0                   | p < 0.005  | -2.9                   |            |
| IL6                        | -1.3                 |          | 1.2                   |          | -1.2                |           | 2.9                   | p < 0.0005 | 1.1                    |            |
| Mast Cell Associated       |                      |          |                       |          |                     |           |                       |            |                        |            |
| CD44                       | -1.1                 |          | 1.6                   |          | 1.4                 |           | -1.0                  |            | -1.7                   |            |
| CD45A                      | -1.9                 |          | 1.5                   |          | 1.4                 |           | 2.4                   | p < 0.05   | 3.1                    | p < 0.05   |
| CDK                        | -1.0                 |          | 1.2                   |          | 2.0                 | p < 0.05  | 1.2                   |            | 1.9                    |            |
| TPSAB1 (MC trypt)          | -1.0                 |          | -1.8                  |          | 2.5                 |           | 1.5                   |            | 3.1                    | p < 0.05   |

Table S5 Lung 7 DAI vs Control

| Gene                       | 100 usp/kg<br>Control |           | 1000 usp/kg<br>Control |          | Control<br>Infected |            | 100 usp/kg<br>Infected |            | 1000 usp/kg<br>Infected |            |
|----------------------------|-----------------------|-----------|------------------------|----------|---------------------|------------|------------------------|------------|-------------------------|------------|
|                            | Fold                  | n         | Fold                   | n        | Fold                | n          | Fold                   | n          | Fold                    | n          |
| Misc.                      |                       |           |                        |          |                     |            |                        |            |                         |            |
| BLKRB2                     | -1.1                  |           | -2.1                   |          | -2.6                |            | -1.8                   |            | -4.0                    |            |
| FNMT                       | 2.2                   | p < 0.005 | 1.9                    |          | -1.6                |            | 1.4                    |            | 1.1                     |            |
| RNO                        | 1.7                   |           | 2.1                    |          | 1.0                 |            | 3.4                    |            | 1.7                     |            |
| TGFB1 (CD39)               | 1.8                   |           | 1.4                    |          | 1.2                 |            | -1.4                   |            | -1.7                    |            |
| PRR                        | -4.6                  | p < 0.005 | 1.9                    |          | 10.0                | p < 0.0001 | 7.6                    | p < 0.0005 | 7.7                     | p < 0.0005 |
| IL1A                       | 1.7                   |           | -1.1                   |          | -1.5                |            | 1.0                    |            | -1.2                    |            |
| Mucus and Fluid Generation |                       |           |                        |          |                     |            |                        |            |                         |            |
| CFTR                       | 1.4                   |           | 1.0                    |          | -1.3                |            | -1.5                   |            | -1.6                    |            |
| IL33                       | 1.2                   |           | -1.5                   |          | 3.1                 |            | 3.3                    | p < 0.05   | -3.1                    |            |
| IL27                       | 1.1                   |           | -1.4                   |          | -1.1                |            | 1.1                    |            | -1.2                    |            |
| MUC                        | 2.0                   |           | 1.6                    |          | 1.1                 |            | 1.8                    |            | -1.4                    |            |
| MUC2AC                     | -1.3                  |           | -1.1                   |          | 2.4                 |            | 1.2                    |            | -2.1                    |            |
| MUC5B                      | 1.0                   |           | -1.1                   |          | -2.0                |            | -1.7                   |            | -2.8                    |            |
| Prostaglandin/Leukotriene  |                       |           |                        |          |                     |            |                        |            |                         |            |
| ALOX5                      | 1.3                   |           | -1.0                   |          | -1.0                |            | -1.0                   |            | 1.1                     |            |
| ALOX5AP                    | 1.5                   |           | 1.4                    |          | 1.1                 |            | 1.4                    |            | 1.4                     |            |
| CYP11B1                    | 1.9                   |           | 1.5                    |          | 1.1                 |            | 1.1                    |            | -1.1                    |            |
| CYP17B2                    | 1.0                   |           | -1.1                   |          | 1.1                 |            | -1.3                   |            | 1.1                     |            |
| LT4S                       | -1.1                  |           | 1.6                    | p < 0.05 | 1.4                 |            | -1.1                   |            | 1.1                     |            |
| PTGS2 (COX2)               | 1.2                   |           | -1.4                   |          | -1.4                |            | -1.1                   |            | -2.1                    |            |
| T Cell Costimulatory       |                       |           |                        |          |                     |            |                        |            |                         |            |
| TNFSF8 (CD30L)             | -1.3                  |           | 1.9                    |          | 1.0                 |            | -1.3                   |            | -1.2                    |            |
| TNFSF4 (OX40)              | 1.0                   |           | 1.1                    |          | 1.4                 |            | -1.0                   |            | -2.2                    | p < 0.05   |
| T Cell Expressed           |                       |           |                        |          |                     |            |                        |            |                         |            |
| CD124                      | 1.3                   |           | 3.4                    | p < 0.05 | 1.4                 |            | 1.2                    |            | -1.2                    |            |
| CD5                        | 1.7                   |           | -1.1                   |          | -1.2                |            | -1.4                   |            | -1.4                    |            |
| CD8A                       | 1.1                   |           | 1.8                    |          | 1.1                 |            | -1.0                   |            | 1.0                     |            |
| TNFRSF4 (OX40)             | -1.4                  |           | 1.6                    |          | 1.1                 |            | 1.0                    |            | -1.1                    |            |

Table S5 Lung 7 DAI vs Control

| Gene                    | 100 ug/kg<br>Control |            | 1000 ug/kg<br>Control |            | Control<br>Infected |            | 100 ug/kg<br>Infected |            | 1000 ug/kg<br>Infected |            |
|-------------------------|----------------------|------------|-----------------------|------------|---------------------|------------|-----------------------|------------|------------------------|------------|
|                         | Fold                 | $\alpha$   | Fold                  | $\alpha$   | Fold                | $\alpha$   | Fold                  | $\alpha$   | Fold                   | $\alpha$   |
| Th1-Associated          |                      |            |                       |            |                     |            |                       |            |                        |            |
| Cytokines               |                      |            |                       |            |                     |            |                       |            |                        |            |
| IFN $\gamma$            | 3.2                  | $p < 0.05$ | 3.3                   | $p < 0.05$ | 3.9                 | $p < 0.05$ | 4.7                   | $p < 0.05$ | 3.2                    | $p = 0.07$ |
| IL12 $\beta$            | 1.9                  |            | 1.6                   |            | 1.5                 |            | 1.9                   |            | 1.0                    |            |
| IL12 $\alpha$           | 1.9                  |            | 1.9                   |            | -1.0                |            | -3.1                  |            | -1.8                   |            |
| IL22                    | -1.0                 |            | 3.1                   |            | 1.2                 |            | 2.8                   |            | 1.7                    |            |
| Surface Receptors       |                      |            |                       |            |                     |            |                       |            |                        |            |
| IL18RA                  | -1.1                 |            | 1.2                   |            | -1.1                |            | -1.8                  |            | -1.7                   |            |
| SOCS/SHS                |                      |            |                       |            |                     |            |                       |            |                        |            |
| SOCS1                   | 1.0                  |            | 1.1                   |            | -1.4                |            | 1.2                   |            | -1.8                   |            |
| SHS4                    | 1.1                  |            | -1.3                  |            | -1.2                |            | -1.3                  |            | -1.4                   |            |
| Intracellular Signaling |                      |            |                       |            |                     |            |                       |            |                        |            |
| TYK                     | 1.4                  |            | 2.4                   |            | -1.1                |            | -1.1                  |            | -1.1                   |            |
| Transcription Factors   |                      |            |                       |            |                     |            |                       |            |                        |            |
| TFX21                   | 1.4                  |            | -1.0                  |            | -1.1                |            | -1.1                  |            | -1.0                   |            |
| Th2-Associated          |                      |            |                       |            |                     |            |                       |            |                        |            |
| Cytokines               |                      |            |                       |            |                     |            |                       |            |                        |            |
| IL4                     | 3.2                  | $p < 0.05$ | 2.4                   |            | 1.6                 |            | 4.0                   | $p < 0.05$ | 3.3                    | $p < 0.05$ |
| IL5                     | 1.8                  |            | -1.2                  |            | -1.7                |            | 4.6                   | $p = 0.07$ | -1.2                   |            |
| IL13                    | 2.4                  |            | -1.1                  |            | -2.7                |            | 8.1                   | $p < 0.05$ | 1.4                    |            |
| IMD1 (STAT1)            | 1.4                  |            | 1.2                   |            | -1.1                |            | -1.4                  |            | -1.4                   |            |
| Cytokine Receptors      |                      |            |                       |            |                     |            |                       |            |                        |            |
| IL4R                    | -1.1                 |            | 1.1                   |            | -1.8                |            | -1.2                  |            | -1.7                   |            |
| IL13RA1                 | 2.0                  |            | -1.1                  |            | -1.2                |            | -1.9                  |            | -2.1                   |            |
| IL13RA2                 | 1.7                  |            | 2.2                   | $p < 0.05$ | 1.3                 |            | 1.7                   |            | 1.4                    |            |
| IL5R                    | 1.5                  |            | 2.4                   |            | 2.0                 |            | 1.9                   |            | 2.0                    |            |
| SOCS/SHS                |                      |            |                       |            |                     |            |                       |            |                        |            |
| SHS1                    | -1.4                 |            | -1.1                  |            | -1.4                |            | -1.8                  | $p < 0.05$ | -1.4                   |            |
| SHS3                    | -1.0                 |            | -1.3                  |            | -1.7                |            | -2.0                  |            | -2.2                   |            |
| SOCS3                   | 1.1                  |            | -1.3                  |            | 1.0                 |            | -1.2                  |            | -1.6                   |            |
| Surface Receptors       |                      |            |                       |            |                     |            |                       |            |                        |            |
| OPR4 (CRTH2)            | 1.7                  |            | 1.0                   |            | 1.2                 |            | 1.5                   |            | -1.3                   |            |
| Transcription Factors   |                      |            |                       |            |                     |            |                       |            |                        |            |
| GATA3                   | -1.5                 |            | 1.4                   |            | 1.5                 |            | -2.7                  | $p < 0.05$ | -2.0                   |            |
| STAT6                   | -1.2                 |            | -1.1                  |            | -1.4                |            | -1.5                  |            | -2.4                   |            |
| Treg Associated         |                      |            |                       |            |                     |            |                       |            |                        |            |
| CD25                    | 1.2                  |            | 1.7                   |            | 1.1                 |            | 1.1                   |            | 1.3                    |            |
| FOXP3                   | -1.3                 |            | 1.1                   |            | 1.3                 |            | -1.2                  |            | -1.4                   |            |
| IL10                    | 1.7                  |            | 3.9                   |            | 1.4                 |            | 1.4                   |            | 3.5                    |            |
| FOXP1                   | -1.3                 |            | -1.2                  |            | -1.3                |            | -1.7                  |            | -1.4                   |            |
| TNFRSF18 (GITR)         | -1.3                 |            | 1.7                   |            | 1.4                 |            | 1.4                   |            | -1.0                   |            |

Table S5 Lung 7 DAI vs Infected

|                            | Gene              | 100 ug/kg Control |           | 1000 ug/kg Control |          |
|----------------------------|-------------------|-------------------|-----------|--------------------|----------|
|                            |                   | Fold              | n         | Fold               | n        |
| Alternatively Activated Mφ | ARG1              | 1.9               |           | 1.0                |          |
|                            |                   |                   | p < 0.05  |                    |          |
|                            | CD8A              | -2.1              |           | 1.2                |          |
| Chemokines                 | CCL11 (EOTF)      | -1.3              |           | -2.4               |          |
|                            | CCL24 (EOTF)      | 1.1               |           | -1.2               |          |
|                            | CCL28 (EOTF)      | 3.2               |           | -1.9               |          |
| Chemokine Receptors        | CCR3              | -1.1              |           | 1.5                |          |
|                            | CCR4              | 1.0               |           | -1.3               |          |
|                            | CCR7              | -1.4              |           | -1.5               |          |
| CCR                        | EBB1 (CCR1)       | 1.9               |           | 1.3                |          |
|                            | EBB2 (CCR2)       | 2.1               |           | 1.3                |          |
| Endothelial Associated     | EPX               | -1.6              |           | -2.7               |          |
|                            |                   |                   |           |                    |          |
| Immunoglobulin Associated  | IgHA1             | 2.0               |           | 1.1                |          |
|                            | IgHE              | -1.3              |           | 4.6                | p < 0.05 |
|                            | IgHC1             | -1.3              |           | -1.0               |          |
|                            | IgHC2A            | -8.7              | p < 0.08  | 1.2                |          |
|                            | IgHC2B            | -1.1              |           | 1.2                |          |
|                            | IgHC3             | 1.6               |           | -5.1               | p < 0.05 |
|                            | IgHC4             | -3.6              | p < 0.06  | 1.4                |          |
|                            | IgJ               | 1.3               |           | -1.2               |          |
|                            | IgM               | -1.4              |           | -1.5               |          |
|                            |                   |                   |           |                    |          |
| Inflammation               | IL1B              | 4.0               | p < 0.05  | -2.2               |          |
|                            | IL6               | 3.4               | p < 0.001 | 1.3                |          |
| Mast Cell Associated       | MCN1              | -2.4              | p < 0.06  | -2.2               |          |
|                            | EPX1A             | 1.8               |           | -2.2               | p < 0.05 |
|                            | PKC               | -1.6              |           | -2.0               |          |
|                            | TPSAB1 (MC trypt) | -1.7              |           | 1.2                |          |
|                            |                   |                   |           |                    |          |

Table S5 Lung 7 DAI vs Non-Infected ATRA Control

|  | 100 ug/kg Control |           |  | 1000 ug/kg Control |            |  |
|--|-------------------|-----------|--|--------------------|------------|--|
|  | Fold              | n         |  | Fold               | n          |  |
|  | 1.4               |           |  | -1.6               |            |  |
|  | -2.2              |           |  | -1.9               |            |  |
|  | 1.6               | p < 0.06  |  | 1.3                |            |  |
|  | -1.3              |           |  | -2.6               |            |  |
|  | 22.1              | p < 0.005 |  | 1.7                |            |  |
|  | 1.3               |           |  | 1.7                |            |  |
|  | 1.0               |           |  | -1.1               |            |  |
|  | -1.7              |           |  | -1.2               |            |  |
|  | -1.1              |           |  | -2.3               |            |  |
|  | -1.3              |           |  | -1.9               |            |  |
|  | 2.6               |           |  | 1.9                |            |  |
|  | 1.7               |           |  | 1.4                |            |  |
|  | -3.4              | p < 0.06  |  | -1.1               |            |  |
|  | -1.1              |           |  | -1.0               |            |  |
|  | 1.2               |           |  | -1.3               |            |  |
|  | 1.5               | p < 0.08  |  | 3.1                | p < 0.0005 |  |
|  | -1.8              |           |  | -9.9               | p < 0.01   |  |
|  | -1.1              |           |  | -1.0               |            |  |
|  | 1.1               |           |  | -1.5               |            |  |
|  | -1.7              |           |  | -1.7               |            |  |
|  | 2.3               |           |  | -4.1               | p < 0.05   |  |
|  | -2.3              | p < 0.05  |  | -1.1               |            |  |
|  | -1.7              |           |  | 2.6                | p < 0.06   |  |
|  | 1.3               |           |  | 2.0                | p < 0.06   |  |
|  | 1.3               |           |  | 1.4                |            |  |
|  | 1.5               |           |  | 5.5                | p < 0.005  |  |

Table S5 Lung 7 DAI vs Infected

| Gene                       | 100 ug/kg<br>Control |   | 1000 ug/kg<br>Control |          |
|----------------------------|----------------------|---|-----------------------|----------|
|                            | Fold                 | n | Fold                  | n        |
| Misc.                      |                      |   |                       |          |
| SLKRB2                     | 1.5                  |   | -1.5                  |          |
| PRMT                       | 1.4                  |   | 1.2                   |          |
| RNO2                       | 3.3                  |   | 1.6                   |          |
| TGFB1 (CD39)               | -1.7                 |   | -2.0                  |          |
| PRR                        | -1.3                 |   | -2.2                  | p < 0.05 |
| SLC11A                     | 1.6                  |   | 1.2                   |          |
| Mucus and Fluid Generation |                      |   |                       |          |
| CFTR                       | -1.2                 |   | -1.2                  |          |
| SLC41                      | 1.8                  |   | -15.8                 | p < 0.05 |
| GN2                        | 1.2                  |   | -1.0                  |          |
| MUC2                       | 1.8                  |   | -1.4                  |          |
| MUC5AC                     | 2.2                  |   | -5.0                  |          |
| GN2N1G                     | 1.2                  |   | -1.4                  |          |
| Prostaglandin/Leukotriene  |                      |   |                       |          |
| ALOX5                      | 1.0                  |   | 1.1                   |          |
| ALOX5AP                    | 1.2                  |   | 1.2                   |          |
| CYP11B1                    | 1.5                  |   | -1.1                  |          |
| KVSLYB2                    | 1.2                  |   | 1.0                   |          |
| LTC4S                      | -1.6                 |   | -1.3                  |          |
| PTGS2 (COX2)               | 1.0                  |   | -1.6                  |          |
| T Cell Costimulatory       |                      |   |                       |          |
| TNFSF8 (CD30L)             | -1.3                 |   | -1.2                  |          |
| TNFSF4 (OX40L)             | -1.3                 |   | -1.6                  |          |
| Accessory Cell Expressed   |                      |   |                       |          |
| T Cell Expressed           |                      |   |                       |          |
| CTLA4                      | -1.2                 |   | -1.7                  |          |
| ICOS                       | -1.2                 |   | -1.2                  |          |
| CD28                       | -1.1                 |   | -1.0                  |          |
| TNFRSF4 (OX40)             | -1.1                 |   | -1.2                  |          |

Table S5 Lung 7 DAI vs Non-Infected ATRA Control

| Gene                       | 100 ug/kg<br>Control |          | 1000 ug/kg<br>Control |          |
|----------------------------|----------------------|----------|-----------------------|----------|
|                            | Fold                 | n        | Fold                  | n        |
| Misc.                      |                      |          |                       |          |
|                            | -1.6                 |          | -5.5                  |          |
|                            | -1.6                 |          | -1.6                  |          |
|                            | 2.0                  |          | -1.5                  |          |
|                            | -2.5                 |          | -2.4                  |          |
|                            | -1.1                 |          | -2.4                  | p = 0.08 |
|                            | -1.6                 |          | -1.1                  |          |
| Mucus and Fluid Generation |                      |          |                       |          |
|                            | -2.0                 |          | -1.6                  |          |
|                            | -7.9                 | p = 0.07 | -2.1                  |          |
|                            | -1.2                 |          | 1.1                   |          |
|                            | -1.1                 |          | -2.2                  |          |
|                            | -1.3                 |          | -2.4                  |          |
|                            | -1.7                 |          | -2.2                  |          |
| Prostaglandin/Leukotriene  |                      |          |                       |          |
|                            | -1.3                 |          | 1.1                   |          |
|                            | -1.1                 |          | -1.0                  |          |
|                            | -1.1                 |          | -2.2                  |          |
|                            | -1.3                 |          | -1.0                  |          |
|                            | 1.0                  |          | -1.5                  |          |
|                            | -1.6                 |          | -1.4                  |          |
| T Cell Costimulatory       |                      |          |                       |          |
|                            | 1.0                  |          | -2.2                  | p = 0.06 |
|                            | -1.1                 | p = 0.06 | -1.4                  | p = 0.04 |
| Accessory Cell Expressed   |                      |          |                       |          |
|                            | -1.1                 |          | -4.1                  | p < 0.01 |
|                            | -1.4                 |          | -1.1                  |          |
|                            | -1.4                 |          | -1.7                  |          |
|                            | 1.5                  |          | -1.7                  |          |

Table S5 Lung 7 DAI vs Infected

| Gene                    | 100 ug/kg<br>Control |          | 1000 ug/kg<br>Control |   |
|-------------------------|----------------------|----------|-----------------------|---|
|                         | Fold                 | n        | Fold                  | n |
| TH1-Associated          |                      |          |                       |   |
| Cytokines               |                      |          |                       |   |
| IFN $\gamma$            | 1.2                  |          | -1.2                  |   |
| IL12 $\beta$            | -1.8                 |          | -1.5                  |   |
| IL12 $\alpha$           | -3.1                 |          | -1.8                  |   |
| IL22                    | 2.4                  |          | 1.5                   |   |
| Surface Receptors       |                      |          |                       |   |
| IL13RA                  | -1.4                 |          | -1.5                  |   |
| SOCS/SHS                |                      |          |                       |   |
| SOCS1                   | 1.7                  |          | -1.3                  |   |
| SHS4                    | -1.3                 |          | -1.2                  |   |
| Intracellular Signaling |                      |          |                       |   |
| TYK                     | -1.2                 |          | -1.6                  |   |
| Transcription Factors   |                      |          |                       |   |
| TFX21                   | 1.0                  |          | -1.4                  |   |
| TH2-Associated          |                      |          |                       |   |
| Cytokines               |                      |          |                       |   |
| IL4                     | 2.1                  | n < 0.05 | -1.2                  |   |
| IL5                     | 1.1                  |          | -2.4                  |   |
| IL13                    | 22.1                 | p < 0.05 | 2.0                   |   |
| TMED1 (STAT)            | -1.2                 |          | -1.2                  |   |
| Cytokine Receptors      |                      |          |                       |   |
| IL4R                    | 1.5                  |          | 1.1                   |   |
| IL13RA1                 | -1.8                 |          | -2.1                  |   |
| IL13RA2                 | 1.5                  |          | 1.0                   |   |
| IL5R                    | -1.1                 |          | 1.0                   |   |
| SOCS/SHS                |                      |          |                       |   |
| SHS1                    | -1.4                 |          | -1.0                  |   |
| SHS3                    | -1.7                 |          | -1.9                  |   |
| SHS3                    | -1.3                 |          | 1.0                   |   |
| Surface Receptors       |                      |          |                       |   |
| GPR44 (CRTH2)           | 1.2                  |          | -1.6                  |   |
| Transcription Factors   |                      |          |                       |   |
| GATA3                   | -1.8                 |          | -1.5                  |   |
| STAT6                   | -1.0                 |          | -1.7                  |   |
| Treg Associated         |                      |          |                       |   |
| CD25                    | 1.0                  |          | 1.1                   |   |
| FOXP3                   | -1.5                 |          | -1.9                  |   |
| IL10                    | 1.2                  |          | 2.1                   |   |
| TIGB1                   | -1.3                 |          | -1.1                  |   |
| TNFRSF18 (GITR)         | 1.1                  |          | -1.4                  |   |

Table S5 Lung 7 DAI vs Non-Infected ATRA Control

| Gene                    | 100 ug/kg<br>Control |          | 1000 ug/kg<br>Control |          |
|-------------------------|----------------------|----------|-----------------------|----------|
|                         | Fold                 | n        | Fold                  | n        |
| TH1-Associated          |                      |          |                       |          |
| Cytokines               |                      |          |                       |          |
| IFN $\gamma$            | -1.1                 |          | -1.6                  |          |
| IL12 $\beta$            | -1.0                 |          | -1.6                  |          |
| IL22                    | -5.7                 | p < 0.05 | -3.4                  |          |
| IL23                    | 2.9                  |          | -1.9                  |          |
| Surface Receptors       |                      |          |                       |          |
| IL13RA                  | -1.7                 |          | -2.0                  |          |
| SOCS/SHS                |                      |          |                       |          |
| SOCS1                   | 1.2                  |          | -1.9                  | n < 0.02 |
| SHS4                    | -1.6                 |          | -1.1                  |          |
| Intracellular Signaling |                      |          |                       |          |
| TYK                     | -1.1                 |          | 1.3                   |          |
| Transcription Factors   |                      |          |                       |          |
| TFX21                   | -1.5                 |          | -1.5                  |          |
| TH2-Associated          |                      |          |                       |          |
| Cytokines               |                      |          |                       |          |
| IL4                     | 2.3                  | n < 0.05 | 1.3                   |          |
| IL5                     | 5.5                  | p < 0.05 | 1.5                   |          |
| IL13                    | 3.1                  |          | -1.2                  |          |
| TMED1 (STAT)            | -1.9                 |          | -1.7                  |          |
| Cytokine Receptors      |                      |          |                       |          |
| IL4R                    | -1.1                 |          | -1.8                  |          |
| IL13RA1                 | -3.8                 | n < 0.05 | -2.3                  |          |
| IL13RA2                 | 1.0                  |          | -1.7                  |          |
| IL5R                    | -1.3                 |          | -1.1                  |          |
| SOCS/SHS                |                      |          |                       |          |
| SHS1                    | -1.4                 |          | -1.4                  |          |
| SHS3                    | -2.0                 |          | -1.5                  |          |
| SHS3                    | 1.0                  |          | 1.0                   |          |
| Surface Receptors       |                      |          |                       |          |
| GPR44 (CRTH2)           | -1.1                 |          | -1.3                  |          |
| Transcription Factors   |                      |          |                       |          |
| GATA3                   | -1.8                 |          | -1.5                  |          |
| STAT6                   | -1.2                 |          | -2.0                  |          |
| Treg Associated         |                      |          |                       |          |
| CD25                    | -1.1                 |          | -1.4                  |          |
| FOXP3                   | 1.1                  |          | -1.7                  |          |
| IL10                    | -1.2                 |          | -1.6                  |          |
| TIGB1                   | -1.3                 |          | -1.2                  |          |
| TNFRSF18 (GITR)         | 1.9                  |          | -1.7                  |          |
