# Supplementary material
Source: PubMed Central journal article supplement (PMC2687331)
Supplement: supp_77_6_2576__6.pdf [file supp_77_6_2576__6.pdf]

Table S6 Lung 14 DA vs Control

| Gene                       | 100 ug/kg<br>Control |   | 1000 ug/kg<br>Control |            | Control<br>Infected |              | 100 ug/kg<br>Infected |             | 1000 ug/kg<br>Infected |             |
|----------------------------|----------------------|---|-----------------------|------------|---------------------|--------------|-----------------------|-------------|------------------------|-------------|
|                            | Fold                 | > | Fold                  | >          | Fold                | >            | Fold                  | >           | Fold                   | >           |
| Alternatively Activated Mφ |                      |   |                       |            |                     |              |                       |             |                        |             |
| ARG1                       | 1.5                  |   | -1.0                  |            | 1.8                 |              | 1.7                   |             | 1.5                    |             |
| CD8A                       | 1.1                  |   | 1.5                   |            | -2.9                |              | -2.4                  |             | -1.8                   |             |
| Chemokines                 |                      |   |                       |            |                     |              |                       |             |                        |             |
| CCL11 (EOTF)               | 1.0                  |   | 1.9                   |            | 7.9                 | $p = 0.06$   | 14.2                  | $p < 0.05$  | 8.3                    | $p < 0.05$  |
| CCL24 (EOTF)               | 1.0                  |   | -3.1                  |            | 1.0                 |              | 1.0                   |             | 1.6                    |             |
| CCL3 (EOTF)                | -1.2                 |   | -1.2                  |            | 1.9                 |              | 3.2                   | $p < 0.05$  | 1.9                    |             |
| Chemokine Receptors        |                      |   |                       |            |                     |              |                       |             |                        |             |
| CCR3                       | 1.4                  |   | -1.2                  |            | 1.5                 |              | 2.4                   | $p < 0.05$  | 2.5                    | $p < 0.05$  |
| CCR4                       | -1.0                 |   | 1.3                   |            | 2.9                 |              | 1.2                   |             | 2.4                    |             |
| CCR7                       | -1.1                 |   | 3.4                   |            | 1.1                 |              | 1.0                   |             | 1.0                    |             |
| CXCR                       |                      |   |                       |            |                     |              |                       |             |                        |             |
| EBI1 (CXCR1)               | 2.7                  |   | 4.0                   |            | 1.5                 |              | -1.2                  |             | -1.1                   |             |
| EBI2 (CXCR2)               | 2.0                  |   | 3.2                   |            | 1.1                 |              | -1.9                  |             | 1.2                    |             |
| Eosinophil Associated      |                      |   |                       |            |                     |              |                       |             |                        |             |
| EPY                        | 1.7                  |   | 2.8                   |            | 2.5                 |              | 12.7                  | $p < 0.005$ | 11.6                   | $p < 0.005$ |
| Immunoglobulin Associated  |                      |   |                       |            |                     |              |                       |             |                        |             |
| IgHA1                      | -1.4                 |   | -1.4                  |            | 1.2                 |              | 3.0                   | $p < 0.01$  | -1.7                   |             |
| IgH                        | -2.0                 |   | -1.4                  |            | 4.9                 | $p = 0.07$   | 3.2                   |             | 1.5                    | $p < 0.05$  |
| IgG1                       | 1.3                  |   | -1.1                  |            | 2.3                 |              | 1.8                   |             | 1.6                    |             |
| IgG2A                      | 2.7                  |   | 11.3                  | $p = 0.09$ | 1.4                 |              | 7.8                   |             | 7.3                    |             |
| IgG2B                      | 2.1                  |   | 1.5                   |            | 9.7                 | $p < 0.005$  | 7.6                   | $p < 0.005$ | 5.9                    | $p < 0.005$ |
| IgG3                       | -1.3                 |   | -1.2                  |            | 2.7                 |              | 1.1                   |             | -9.2                   |             |
| IgG4                       | 3.1                  |   | 10.5                  | $p < 0.05$ | 7.6                 |              | 10.4                  | $p < 0.05$  | 14.5                   | $p < 0.05$  |
| IgJ                        | -1.1                 |   | -1.0                  |            | 2.4                 | $p < 0.05$   | 1.6                   |             | 1.3                    |             |
| IgM                        | 1.2                  |   | 1.5                   |            | 1.1                 |              | 1.5                   |             | 1.9                    |             |
| Inflammation               |                      |   |                       |            |                     |              |                       |             |                        |             |
| IL1B                       | 1.9                  |   | 1.5                   |            | 3.1                 | $p < 0.05$   | -1.3                  |             | -1.8                   |             |
| IL6                        | -1.0                 |   | 1.3                   |            | -1.0                |              | -1.8                  | $p < 0.05$  | 1.3                    |             |
| Mast Cell Associated       |                      |   |                       |            |                     |              |                       |             |                        |             |
| CD43                       | -1.3                 |   | 1.1                   |            | -1.0                |              | -1.6                  |             | 1.2                    |             |
| CD43A                      | 1.3                  |   | 1.9                   |            | 4.1                 |              | 2.8                   |             | 4.1                    |             |
| HMC                        | 1.2                  |   | -1.0                  |            | 6.1                 | $p < 0.0005$ | 3.4                   | $p < 0.005$ | 3.7                    | $p < 0.005$ |
| TPS481 (MC Type)           | -1.2                 |   | 1.2                   |            | 2.3                 | $p < 0.05$   | 2.1                   | $p < 0.05$  | 4.9                    | $p < 0.005$ |

Table S6. Lung 14 DAI vs Control

| Gene                       | 1000 up/kg<br>Control |            | 1000 up/kg<br>Control |            | Control<br>Infected |            | 100 up/kg<br>Infected |            | 1000 up/kg<br>Infected |            |
|----------------------------|-----------------------|------------|-----------------------|------------|---------------------|------------|-----------------------|------------|------------------------|------------|
|                            | Fold                  | >          | Fold                  | >          | Fold                | >          | Fold                  | >          | Fold                   | >          |
| Misc.                      |                       |            |                       |            |                     |            |                       |            |                        |            |
| BORRB2                     | -1.3                  |            | 1.3                   |            | 1.4                 |            | -3.7                  | $p < 0.05$ | -1.4                   |            |
| JMOT                       | 1.4                   |            | 1.6                   |            | 1.9                 |            | 1.1                   |            | 1.1                    |            |
| INDO                       | 2.1                   |            | 1.6                   |            | 1.2                 |            | -1.7                  |            | -3.4                   |            |
| ITGA1 (CD29)               | -1.4                  |            | 1.1                   |            | 1.2                 |            | -3.4                  | $p < 0.06$ | -1.3                   |            |
| INR                        | -1.6                  |            | -1.3                  |            | -1.4                |            | -1.3                  |            | 1.1                    |            |
| SLC11A                     | 1.6                   |            | 2.2                   |            | 1.3                 |            | 1.1                   |            | 1.7                    |            |
| Mucus and Fluid Generation |                       |            |                       |            |                     |            |                       |            |                        |            |
| CFTR                       | -1.3                  |            | -1.1                  |            | 1.3                 |            | -2.7                  |            | -1.9                   |            |
| SLCA1                      | -3.5                  | $p < 0.05$ | -4.3                  | $p < 0.07$ | 1.8                 |            | 1.7                   |            | 1.3                    |            |
| GCNT                       | 1.2                   |            | 1.1                   |            | 1.2                 |            | -1.7                  |            | 1.6                    |            |
| MUC3                       | 1.2                   |            | 1.1                   |            | -1.1                |            | -1.6                  |            | -1.2                   |            |
| MUC5AC                     | -8.5                  |            | -4.2                  |            | -15.7               | $p < 0.05$ | -2.0                  |            | -2.5                   |            |
| SCNN1G                     | -1.2                  |            | 2.1                   |            | -1.2                |            | -2.2                  |            | -1.1                   |            |
| Prostaglandin/Leukotriene  |                       |            |                       |            |                     |            |                       |            |                        |            |
| ALOX5                      | 1.0                   |            | -1.1                  |            | 1.9                 |            | -1.2                  |            | 1.4                    |            |
| ALOX5AP                    | 1.2                   |            | 1.1                   |            | 1.7                 |            | 1.0                   |            | 1.4                    |            |
| CYP2C8                     | -1.8                  |            | 1.7                   |            | 2.4                 |            | -1.6                  |            | 1.1                    |            |
| CYP2C19                    | -1.1                  |            | 1.3                   |            | 1.3                 |            | 1.1                   |            | 1.7                    | $p < 0.05$ |
| LTC4S                      | -1.1                  |            | 1.1                   |            | 1.4                 |            | 1.4                   |            | 1.5                    |            |
| PTGS2 (COX2)               | 1.4                   |            | 1.4                   |            | 1.9                 |            | -1.6                  |            | 1.6                    |            |
| T Cell Costimulatory       |                       |            |                       |            |                     |            |                       |            |                        |            |
| Accessory Cell Expressed   |                       |            |                       |            |                     |            |                       |            |                        |            |
| TNFSF (CD30L)              | 2.3                   | $p < 0.05$ | 2.4                   | $p < 0.05$ | 1.8                 |            | 1.3                   |            | 2.3                    | $p < 0.05$ |
| TNFSF (HVEM)               | -1.1                  |            | 1.4                   |            | 1.0                 |            | -1.9                  |            | -1.1                   |            |
| T Cell Expressed           |                       |            |                       |            |                     |            |                       |            |                        |            |
| CTLA4                      | 1.4                   |            | 1.0                   |            | 1.3                 |            | -1.3                  |            | -1.1                   |            |
| ICOS                       | 1.4                   |            | 1.5                   |            | 1.9                 | $p < 0.05$ | -1.7                  |            | 1.4                    |            |
| ITGA                       | 1.7                   |            | 1.7                   |            | 1.4                 |            | -1.1                  |            | 1.0                    |            |
| TNFRSF4 (OX40)             | 1.4                   |            | 1.8                   |            | 1.3                 |            | -1.7                  |            | 1.9                    |            |

Table S6: Lung 14 DAI vs Control

| Gene                           | 100 ug/kg<br>Control |   | 1000 ug/kg<br>Control |   | Control<br>Infected |   | 100 ug/kg<br>Infected |   | 1000 ug/kg<br>Infected |   |
|--------------------------------|----------------------|---|-----------------------|---|---------------------|---|-----------------------|---|------------------------|---|
|                                | Fold                 | ± | Fold                  | ± | Fold                | ± | Fold                  | ± | Fold                   | ± |
| <b>Th1-Associated</b>          |                      |   |                       |   |                     |   |                       |   |                        |   |
| <b>Cytokines</b>               |                      |   |                       |   |                     |   |                       |   |                        |   |
| IFN $\gamma$                   | 1.3                  |   | 1.4                   |   | 1.2                 |   | -1.1                  |   | -1.3                   |   |
| IL12A                          | 1.4                  |   | 1.7                   |   | 1.6                 |   | -1.0                  |   | -2.1                   |   |
| IL12B                          | 1.4                  |   | 1.1                   |   | 2.0                 |   | 1.3                   |   | -1.1                   |   |
| IL27                           | -1.2                 |   | -1.3                  |   | 1.9                 |   | 1.6                   |   | 1.3                    |   |
|                                |                      |   |                       |   |                     |   | $p < 0.05$            |   | $p < 0.05$             |   |
| <b>Surface Receptors</b>       |                      |   |                       |   |                     |   |                       |   |                        |   |
| IL18R1                         | -1.4                 |   | 1.0                   |   | 1.0                 |   | -1.8                  |   | 1.0                    |   |
| <b>SOCS/PIAS</b>               |                      |   |                       |   |                     |   |                       |   |                        |   |
| SOCS1                          | 1.0                  |   | -1.2                  |   | 1.2                 |   | -1.6                  |   | -1.8                   |   |
| PIAS4                          | 1.0                  |   | 1.9                   |   | -1.1                |   | -1.8                  |   | -1.2                   |   |
|                                |                      |   |                       |   |                     |   |                       |   | $p < 0.05$             |   |
| <b>Intracellular Signaling</b> |                      |   |                       |   |                     |   |                       |   |                        |   |
| TRK                            | 1.2                  |   | 1.2                   |   | 1.2                 |   | -2.9                  |   | -1.4                   |   |
|                                |                      |   |                       |   |                     |   |                       |   | $p < 0.07$             |   |
| <b>Transcription Factors</b>   |                      |   |                       |   |                     |   |                       |   |                        |   |
| IRF21                          | 1.0                  |   | 1.1                   |   | -1.4                |   | -2.4                  |   | -1.1                   |   |
| <b>Th2-Associated</b>          |                      |   |                       |   |                     |   |                       |   |                        |   |
| <b>Cytokines</b>               |                      |   |                       |   |                     |   |                       |   |                        |   |
| IL4                            | 1.5                  |   | 1.5                   |   | 3.8                 |   | 1.5                   |   | 1.4                    |   |
| IL5                            | 1.4                  |   | 1.4                   |   | 2.1                 |   | 1.2                   |   | 1.0                    |   |
| IL13                           | 2.4                  |   | 1.4                   |   | 2.2                 |   | 1.6                   |   | -2.8                   |   |
| TMEF1 (STAT1)                  | -1.1                 |   | 1.1                   |   | 1.2                 |   | -1.2                  |   | 1.1                    |   |
|                                |                      |   |                       |   |                     |   |                       |   | $p < 0.05$             |   |
| <b>Cytokine Receptors</b>      |                      |   |                       |   |                     |   |                       |   |                        |   |
| IL4R                           | -1.1                 |   | 1.9                   |   | -1.0                |   | -3.5                  |   | -1.3                   |   |
| IL13RA1                        | 2.0                  |   | -1.1                  |   | 1.2                 |   | -1.9                  |   | -2.5                   |   |
| IL13RA2                        | -1.9                 |   | -1.4                  |   | 1.5                 |   | -1.9                  |   | -1.5                   |   |
| IL5R                           | 1.3                  |   | -1.0                  |   | 1.2                 |   | 2.1                   |   | -1.9                   |   |
|                                |                      |   |                       |   |                     |   |                       |   | $p < 0.01$             |   |
| <b>SOCS/PIAS</b>               |                      |   |                       |   |                     |   |                       |   |                        |   |
| PIAS1                          | 1.0                  |   | 1.3                   |   | -1.1                |   | -1.9                  |   | -1.2                   |   |
| PIAS3                          | -1.4                 |   | -1.3                  |   | -1.1                |   | -2.1                  |   | -1.5                   |   |
| SOCS3                          | -1.1                 |   | 1.2                   |   | 1.1                 |   | -1.8                  |   | -1.2                   |   |
|                                |                      |   |                       |   |                     |   |                       |   | $p < 0.05$             |   |
| <b>Surface Receptors</b>       |                      |   |                       |   |                     |   |                       |   |                        |   |
| OPRM1 (GPR1)                   | -1.4                 |   | -1.2                  |   | 1.4                 |   | -1.2                  |   | 1.8                    |   |
| <b>Transcription Factors</b>   |                      |   |                       |   |                     |   |                       |   |                        |   |
| GATA3                          | 1.4                  |   | 1.6                   |   | 1.2                 |   | -1.2                  |   | 1.4                    |   |
| STAT6                          | 1.0                  |   | 1.8                   |   | 1.3                 |   | -1.5                  |   | 1.1                    |   |
| <b>Treg Associated</b>         |                      |   |                       |   |                     |   |                       |   |                        |   |
| IL2RA (CD25)                   | 1.0                  |   | 1.2                   |   | 2.4                 |   | 1.2                   |   | 1.2                    |   |
| FOXP3                          | -1.4                 |   | 1.2                   |   | 1.5                 |   | -1.2                  |   | 1.7                    |   |
| IL10                           | 6.2                  |   | 4.2                   |   | 1.1                 |   | -1.5                  |   | 1.1                    |   |
| TIGIT                          | 1.1                  |   | 1.2                   |   | -1.5                |   | -1.4                  |   | 1.0                    |   |
| ITKSF1A (GITR)                 | 1.0                  |   | 1.4                   |   | 1.8                 |   | 1.4                   |   | 1.6                    |   |

Table S6 Lung 7 DAI vs Infected

| Gene                       | 100 ug/kg<br>Control |          | 1000 ug/kg<br>Control |          |
|----------------------------|----------------------|----------|-----------------------|----------|
|                            | Fold                 | n        | Fold                  | n        |
| Alternatively Activated Mφ |                      |          |                       |          |
| ARG1                       | -1.1                 |          | -1.2                  |          |
| CXRA                       | 1.2                  |          | 1.6                   |          |
| Chemokines                 |                      |          |                       |          |
| CCL11 (EOTF)               | 1.8                  |          | 1.1                   |          |
| CCL24 (EOTF)               | 1.0                  |          | 1.6                   |          |
| CCL28 (EOTF)               | 1.7                  |          | 1.0                   |          |
| Chemokine Receptors        |                      |          |                       |          |
| CCR3                       | 1.7                  |          | 1.7                   |          |
| CCR4                       | -2.4                 |          | -1.2                  |          |
| CCR7                       | -1.1                 |          | -1.1                  |          |
| CXCR                       |                      |          |                       |          |
| IL18R1 (CXCR1)             | -1.8                 |          | -1.6                  |          |
| IL18R2 (CXCR2)             | -2.2                 |          | 1.1                   |          |
| Eosinophil Associated      |                      |          |                       |          |
| EPX                        | 5.2                  | p = 0.08 | 4.7                   | p = 0.1  |
| Immunoglobulin Associated  |                      |          |                       |          |
| IGHA1                      | 1.3                  |          | 1.1                   |          |
| IGHF                       | -1.5                 |          | 1.1                   |          |
| IGHC1                      | -1.5                 |          | -1.5                  |          |
| IGHGA                      | 6.0                  |          | 5.6                   |          |
| IGHGB                      | -1.3                 |          | -1.6                  |          |
| IGHG3                      | -2.1                 |          | -66.2                 | p = 0.08 |
| IGHG4                      | 1.4                  |          | 1.9                   |          |
| IJJ                        | -1.5                 |          | -1.8                  |          |
| IGHE                       | 1.3                  |          | 1.7                   |          |
| Inflammation               |                      |          |                       |          |
| IL1B                       | -3.9                 | p < 0.05 | -6.9                  | p < 0.01 |
| IL6                        | -1.9                 | p < 0.1  | -1.3                  |          |
| Mast Cell Associated       |                      |          |                       |          |
| SMN1                       | -1.6                 |          | 1.3                   |          |
| EPOR1A                     | -1.6                 |          | -1.9                  |          |
| HMC                        | -1.8                 |          | -1.7                  |          |
| TPSAB1 (MC 33)             | -1.1                 |          | 2.1                   | p = 0.08 |

Table S6 Lung 14 DAI vs

| Gene                       | 100 ug/kg<br>Control |           | 1000 ug/kg<br>Control |           |
|----------------------------|----------------------|-----------|-----------------------|-----------|
|                            | Fold                 | n         | Fold                  | n         |
| Alternatively Activated Mφ |                      |           |                       |           |
| ARG1                       | 1.1                  |           | 1.3                   |           |
| CXRA                       | -2.7                 |           | -2.8                  |           |
| Chemokines                 |                      |           |                       |           |
| CCL11 (EOTF)               | 13.6                 | p < 0.05  | 6.5                   |           |
| CCL24 (EOTF)               | 1.0                  |           | 1.6                   |           |
| CCL28 (EOTF)               | 5.5                  | p < 0.005 | 3.0                   | p < 0.05  |
| Chemokine Receptors        |                      |           |                       |           |
| CCR3                       | 1.3                  |           | 3.0                   | p < 0.05  |
| CCR4                       | 1.3                  |           | 1.8                   |           |
| CCR7                       | 1.2                  |           | -2.4                  |           |
| CXCR                       |                      |           |                       |           |
| IL18R1 (CXCR1)             | -3.2                 |           | -4.3                  |           |
| IL18R2 (CXCR2)             | -3.7                 |           | -4.1                  | p < 0.05  |
| Eosinophil Associated      |                      |           |                       |           |
| EPX                        | 7.6                  | p < 0.05  | 4.1                   | p = 0.09  |
| Immunoglobulin Associated  |                      |           |                       |           |
| IGHA1                      | 2.6                  | p < 0.05  | 2.0                   | p < 0.08  |
| IGHF                       | 6.5                  | p < 0.05  | 7.8                   | p < 0.05  |
| IGHC1                      | 1.4                  |           | 1.8                   |           |
| IGHGA                      | 2.9                  |           | -1.5                  |           |
| IGHGB                      | 3.6                  | p = 0.06  | 4.0                   | p < 0.05  |
| IGHG3                      | 1.3                  |           | -20.5                 | p = 0.08  |
| IGHG4                      | 3.3                  |           | 1.4                   |           |
| IJJ                        | 1.7                  |           | 1.3                   |           |
| IGHE                       | 1.3                  |           | 1.3                   |           |
| Inflammation               |                      |           |                       |           |
| IL1B                       | 2.4                  | p = 0.07  | 2.3                   | p = 0.08  |
| IL6                        | -1.7                 | p < 0.08  | -1.7                  |           |
| Mast Cell Associated       |                      |           |                       |           |
| SMN1                       | 1.1                  |           | 1.1                   |           |
| EPOR1A                     | 2.1                  |           | 1.1                   |           |
| HMC                        | 2.9                  | p < 0.05  | 3.9                   | p < 0.005 |
| TPSAB1 (MC 33)             | 2.6                  | p < 0.05  | 4.2                   | p < 0.005 |

Table S6 Lung 7 DAI vs Infected

| Gene                       | 100 ug/kg<br>Control |          | 1000 ug/kg<br>Control |   |
|----------------------------|----------------------|----------|-----------------------|---|
|                            | Fold                 | n        | Fold                  | n |
| Misc.                      |                      |          |                       |   |
| SLKRB2                     | -7.9                 | p < 0.05 | -1.9                  |   |
| FRMT                       | -1.8                 |          | -1.7                  |   |
| RND                        | -1.9                 |          | -1.7                  |   |
| ITGB1 (CD49)               | -2.9                 | p = 0.06 | -1.6                  |   |
| PRR                        | 1.1                  |          | 1.5                   |   |
| SLC11A                     | -1.2                 |          | 1.3                   |   |
| Mucus and Fluid Generation |                      |          |                       |   |
| CFTR                       | -3.5                 |          | -2.5                  |   |
| SLC41                      | -1.1                 |          | -1.2                  |   |
| GLNT                       | -2.1                 |          | -1.2                  |   |
| MUC3                       | -1.6                 |          | -1.1                  |   |
| MUC5AC                     | -10.1                | p = 0.09 | 7.8                   |   |
| GNAN1G                     | -1.9                 |          | -1.1                  |   |
| Prostaglandin/Leukotriene  |                      |          |                       |   |
| ALOX5                      | -2.2                 | p = 0.1  | -1.4                  |   |
| ALOX5AP                    | -1.6                 |          | -1.2                  |   |
| CYP11B1                    | -2.7                 |          | -2.2                  |   |
| KYSL1B2                    | -1.3                 |          | 1.1                   |   |
| LT4S                       | 1.0                  |          | 1.0                   |   |
| EPOR (CD92)                | -4.1                 | p < 0.05 | -2.7                  |   |
| T Cell Costimulatory       |                      |          |                       |   |
| TNFSF8 (CD30L)             | -1.4                 |          | 1.3                   |   |
| TNFSF4 (OX40)              | -1.9                 |          | -1.3                  |   |
| Accessory Cell Expressed   |                      |          |                       |   |
| CTLA4                      | -1.7                 |          | -1.4                  |   |
| ICOS                       | -6.2                 | p < 0.05 | 2.8                   |   |
| CD8A                       | -1.6                 |          | 1.4                   |   |
| TNFRSF4 (OX40)             | -2.2                 |          | 1.5                   |   |

Table S6 Lung 14 DAI vs Non-Infected ATRA Control

| Gene                       | 100 ug/kg<br>Control |          | 1000 ug/kg<br>Control |          |
|----------------------------|----------------------|----------|-----------------------|----------|
|                            | Fold                 | n        | Fold                  | n        |
| Misc.                      |                      |          |                       |          |
|                            | -4.3                 | p = 0.07 | -1.8                  |          |
|                            | -1.1                 |          | -1.1                  |          |
|                            | -3.6                 |          | -2.3                  |          |
|                            | -1.7                 |          | -1.4                  |          |
|                            | 1.4                  |          | 1.4                   |          |
|                            | -1.5                 |          | -1.3                  |          |
| Mucus and Fluid Generation |                      |          |                       |          |
|                            | -2.1                 |          | -1.6                  |          |
|                            | 9.4                  | p < 0.05 | -7.5                  | p < 0.05 |
|                            | -2.0                 |          | -1.9                  |          |
|                            | 1.9                  |          | -1.4                  |          |
|                            | 4.5                  |          | 1.7                   |          |
|                            | -1.8                 |          | -2.7                  |          |
| Prostaglandin/Leukotriene  |                      |          |                       |          |
|                            | -1.2                 |          | 1.6                   |          |
|                            | -1.1                 |          | 1.3                   |          |
|                            | 1.6                  |          | -1.6                  |          |
|                            | 1.0                  |          | 1.3                   |          |
|                            | 1.7                  | p < 0.05 | 1.4                   |          |
|                            | 3.1                  |          | -1.4                  |          |
| T Cell Costimulatory       |                      |          |                       |          |
|                            | -1.8                 |          | -1.0                  |          |
| Accessory Cell Expressed   |                      |          |                       |          |
|                            | -1.7                 |          | -1.7                  |          |
| T Cell Expressed           |                      |          |                       |          |
|                            | -1.8                 |          | -1.1                  |          |
|                            | 1.7                  |          | -1.1                  |          |
|                            | -2.0                 | p = 0.08 | 1.2                   |          |
|                            | -2.3                 |          | 1.0                   |          |

Table S6 Lung 7 DAI vs Infected

| Gene                     | 100 ug/kg<br>Control |          | 1000 ug/kg<br>Control |           |
|--------------------------|----------------------|----------|-----------------------|-----------|
|                          | Fold                 | n        | Fold                  | n         |
| Th1-Associated Cytokines |                      |          |                       |           |
| IFN $\gamma$             | -1.3                 |          | -1.6                  |           |
| IL12 $\beta$             | -1.4                 |          | -2.9                  |           |
| IL12 $\alpha$            | -1.6                 |          | -2.1                  |           |
| IL22                     | 1.0                  |          | 1.0                   |           |
| Surface Receptors        |                      |          |                       |           |
| IL18RA                   | -1.8                 |          | 1.0                   |           |
| SOCS1                    | -1.6                 |          | -2.1                  |           |
| PIAS4                    | -1.7                 |          | -1.1                  |           |
| Intracellular Signaling  |                      |          |                       |           |
| TRK                      | -3.4                 | p = 0.08 | -1.6                  |           |
| Transcription Factors    |                      |          |                       |           |
| IRX1                     | -1.7                 |          | 1.3                   |           |
| Th2-Associated Cytokines |                      |          |                       |           |
| IL4                      | -2.5                 |          | -2.7                  |           |
| IL5                      | -2.5                 | p = 0.08 | -3.1                  |           |
| IL13                     | -3.0                 | p = 0.08 | -17.2                 | p = 0.005 |
| TMD1 (ST2L)              | -1.9                 | p = 0.05 | -1.0                  |           |
| Cytokine Receptors       |                      |          |                       |           |
| IL4R                     | -3.4                 |          | -1.3                  |           |
| IL13RA1                  | -3.5                 | p = 0.06 | -1.5                  |           |
| IL13RA2                  | -2.9                 | p = 0.05 | -2.2                  |           |
| IL5R                     | -1.7                 |          | -1.3                  |           |
| SOCS/PIAS                |                      |          |                       |           |
| PIAS1                    | -1.7                 |          | -1.1                  |           |
| PIAS3                    | -2.0                 | p = 0.08 | -1.4                  |           |
| SOCS3                    | -2.0                 |          | -1.4                  |           |
| Surface Receptors        |                      |          |                       |           |
| OPRM4 (OR104)            | -2.3                 |          | 1.3                   |           |
| Transcription Factors    |                      |          |                       |           |
| GATA3                    | -1.4                 |          | 1.2                   |           |
| STAT6                    | -2.0                 |          | -1.1                  |           |
| Treg Associated          |                      |          |                       |           |
| CD25                     | -2.1                 | p = 0.09 | -1.4                  |           |
| CD29                     | -1.8                 |          | -1.3                  |           |
| IL10                     | -1.6                 |          | -1.0                  |           |
| TIGP1                    | 1.1                  |          | 1.6                   | p = 0.09  |
| TNFRSF18 (GITR)          | -1.3                 |          | -1.1                  |           |

Table S6 Lung 14 DAI vs Non-Infected ATRA Control

| Gene                     | 100 ug/kg<br>Control |          | 1000 ug/kg<br>Control |          |
|--------------------------|----------------------|----------|-----------------------|----------|
|                          | Fold                 | n        | Fold                  | n        |
| Th1-Associated Cytokines |                      |          |                       |          |
| IFN $\gamma$             | -1.5                 |          | -1.8                  |          |
| IL12 $\beta$             | -1.4                 |          | -2.5                  |          |
| IL13                     | -1.1                 |          | -1.2                  |          |
| IL22                     | 1.0                  |          | 1.0                   |          |
| Surface Receptors        |                      |          |                       |          |
| IL18RA                   | -1.7                 |          | 1.0                   |          |
| SOCS/PIAS                |                      |          |                       |          |
| SOCS1                    | -1.6                 |          | -1.6                  |          |
| PIAS4                    | -1.8                 | p < 0.05 | 1.5                   | p = 0.08 |
| Intracellular Signaling  |                      |          |                       |          |
| TRK                      | -3.4                 | p = 0.05 | -1.7                  |          |
| Transcription Factors    |                      |          |                       |          |
| IRX1                     | 2.5                  |          | -1.2                  |          |
| Th2-Associated Cytokines |                      |          |                       |          |
| IL4                      | 1.0                  |          | -1.1                  |          |
| IL5                      | 1.0                  |          | -1.5                  |          |
| IL13                     | -1.8                 |          | -3.9                  | p = 0.06 |
| TMD1 (ST2L)              | -1.5                 |          | 1.0                   |          |
| Cytokine Receptors       |                      |          |                       |          |
| IL4R                     | -3.1                 |          | -2.6                  |          |
| IL13RA1                  | -1.8                 |          | -1.1                  |          |
| IL13RA2                  | -1.0                 |          | -1.1                  |          |
| IL5R                     | -1.7                 |          | -3.0                  | p < 0.05 |
| SOCS/PIAS                |                      |          |                       |          |
| PIAS1                    | -1.8                 | p < 0.05 | -1.5                  | p = 0.08 |
| PIAS3                    | -1.5                 |          | -1.2                  |          |
| SOCS3                    | -1.6                 |          | -1.4                  |          |
| Surface Receptors        |                      |          |                       |          |
| OPRM4 (OR104)            | -1.0                 |          | 3.0                   | p < 0.05 |
| Transcription Factors    |                      |          |                       |          |
| GATA3                    | -1.7                 | p < 0.05 | -1.1                  |          |
| STAT6                    | -1.5                 |          | -1.6                  |          |
| Treg Associated          |                      |          |                       |          |
| CD25                     | 1.1                  |          | 1.0                   |          |
| CD29                     | 1.2                  |          | -1.0                  |          |
| IL10                     | -3.2                 | p < 0.05 | -3.0                  |          |
| TIGP1                    | -1.5                 |          | -1.0                  |          |
| TNFRSF18 (GITR)          | 1.4                  |          | -1.2                  |          |
